# Supplementary material for: Prediction model for missed abortion of patients treated with IVF-ET based on XGBoost: a retrospective study
Source: PeerJ. 2023 Jan 30;11:e14762. doi: 10.7717/peerj.14762 (PMC9893909; doi:10.7717/peerj.14762)
Supplement: Data S1 [file peerj-11-14762-s001.xlsx]

## Sheet: Sheet1
ID	Female age	Male age	Cycle type	Chromosome abnormality	BMI	Infertility type	Male sperm abnormality	Abnormal ovarian structure	Abnormal uterine structure	History of uterine cavity surgery	Years of infertility	FSH	LH	PRL	E2	T	P	AMH	D-Dimer	PT	APTT	TT	FIB	Toxoplasma gondii IgM	Cytomegalovirus IgM	Rubella virus IgM	Herpes simplex virus IgM	ABO blood group	Rh blood group	ACA	ANA	ESR	Chlamydia Infections	gonorrhea	FBG	FT3	FT4	TSH	TG_Ab	TPO_Ab	Cleaning degree of vagina	Fungal vaginosis	Trichomonal vaginosis	Left basal sinus follicle	Right basal sinus follicle	Total number of eggs obtained	Number of embryos implanted	Quality of implanted embryos	Endometrial thickness in transfer date
1	36	37	0	0	21.82	0	1	0	0	0	4	3.01	1.38	19	637.4	0.567545	1.1	1.7	0.39	10.9	24.7	17.8	2.72	0.26	0.25	0.31	1.2	0	0	0	0	6	0	0	4.52	4.78	15.36	1.96	0	1	1	0	0	5	4	11	1	0	9
2	33	35	0	1	20.85	0	1	0	0	0	5	2.76	0.63	22	530.7	0.437451	0.93	3.25	0.36	10.7	27.5	17.8	2.71	0.21	0.34	0.44	1.05	2	0	0	0	9	0	0	4.56	3.83	17.27	1.89	0	0	0	0	0	4	7	13	2	0	9
3	29	38	0	0	19.43	0	1	0	1	0	1	13.04	0.22	25	419.3	0.623149	0.45	5.84	0.15	11.5	24.6	19.7	2.08	0.22	0.18	0.47	1.95	0	0	0	0	8	0	0	4.56	5.66	21.05	4.26	0	0	1	0	0	4	8	14	1	0	9
4	28	32	0	0	21.09	1	1	0	0	0	2	5.59	5	18	169.6	0.52	0.98	8.49	0.12	10.3	25.3	19.5	1.9	0	0.06	0.33	1.26	0	0	0	0	8	0	0	5.15	3.97	15.25	1.61	0	0	1	0	0	19	17	16	1	0	12
5	35	34	0	0	23.55	0	1	0	0	1	1	3.99	1.41	17	433.4	0.461889	0.66	3.37	0.27	10.8	24.5	20.1	2.35	0.55	0.19	0.3	1.64	0	0	0	0	9	0	0	5.46	4.58	14.72	2.72	0	0	1	0	0	8	8	3	2	0	10
6	36	38	0	0	21.63	0	0	0	0	0	1	6.89	5.49	33	87.21	0.54	1.48	2.65	0.21	11	24.3	18.7	2.38	0.26	0.13	0.35	0.82	0	0	0	1	18	0	0	5.47	4.86	15.19	1.48	0	0	0	0	0	7	5	10	1	1	10
7	32	29	0	1	23.59	0	0	0	1	0	4	7.22	7.19	25	209.2	0.42	3.37	1.97	0.36	9.8	26.3	19.2	3.08	0.24	0.31	0.37	1.59	2	0	0	1	15	0	0	5.2	4.81	16.66	2.05	0	0	0	0	0	5	6	12	1	1	10
8	31	38	1	0	21.93	1	0	0	0	0	5	5.39	4.08	21	154.4	0.76	0.21	2.17	0.14	10.8	25.4	19.1	1.97	0.21	0.18	0.26	0.76	1	0	0	0	4	0	0	5.05	4.83	15.18	1.66	0	0	0	0	0	7	11	14	1	0	9
9	32	31	1	0	24.35	1	0	0	1	0	4	3.52	3.12	19	86.77	0.519125	0.12	2.61	0.31	12.5	29.9	17.9	2.94	0.22	0.19	0.33	1.42	0	0	0	0	7	0	0	5.02	4.79	14.41	2.51	0	0	2	0	0	13	7	7	2	0	10
10	27	29	1	0	23.66	1	0	0	1	0	4	1.57	0.36	43	280.7	0.38	0.32	3.11	0.39	11.2	25.9	19.1	2.3	0.25	0.16	0.24	0.37	1	0	0	0	8	0	0	5.65	5.06	16.43	3.24	0	0	1	0	0	10	8	20	1	0	9
11	34	55	1	0	20.91	0	0	0	0	0	1	13.19	3.93	25	94.8	0.939834	0.7	2.92	0.49	10.8	26.3	20	2.59	0.22	0.17	0.27	1.02	2	0	1	0	18	0	0	4.33	4.81	17.19	2.83	1	1	2	0	0	5	4	13	1	0	9
12	30	32	1	0	19.35	1	0	0	1	0	3	5.36	3.67	16	316.3	0.66	0.2	2.77	0.1	11.4	26	18.3	2.25	0.25	0.07	0.29	1.57	2	0	0	0	6	0	0	4.64	4.54	16.79	1.14	0	0	1	0	0	6	4	13	1	0	9
13	31	28	1	0	29.17	1	0	0	0	0	3	2.18	3.87	25	67.61	0.75254	0.67	2.72	0.22	9.6	20.5	17.9	3.94	0.24	0.2	0.33	1.56	2	0	0	0	7	0	0	5.99	5.26	17.16	3.37	0	0	1	0	0	6	5	7	2	0	9
14	39	42	1	0	23.2	0	0	1	0	0	3	7.74	5.35	18	105.3	0.54959	0.64	1.88	0.14	11.4	23.3	18.2	2.45	0.27	0.1	0.32	1.66	0	0	0	0	5	0	0	4.94	5.27	18.55	1.05	0	0	0	0	0	4	2	9	2	0	9
15	32	46	1	0	21.24	0	0	0	0	1	5	3.1	3.34	20	563.6	0.73	0.54	2.21	0.26	10.5	20.3	19.1	2.94	0.23	0.17	0.28	2.43	0	0	0	0	9	0	0	5.62	4.9	20.81	1.54	1	0	0	0	0	6	10	15	1	1	9
16	29	28	1	0	19.38	1	0	0	1	0	7	5.7	0.25	18	496.1	1	1.18	3.77	0.23	11.2	31.2	19.3	2.41	0.52	0.23	0.36	1.3	2	0	0	0	5	0	0	4.67	4.31	15.08	1.18	0	0	1	0	0	6	10	10	2	0	9
17	25	30	1	0	22.81	1	0	0	1	0	4	6.24	15.47	33	132.8	0.67726	0.8	4.04	0.13	11.35	25.71	18.1	3.04	0.22	0.17	0.24	1.09	0	0	1	0	8	0	0	5.09	4.27	17.65	2.14	0	0	1	0	0	9	5	10	2	1	10.32
18	34	36	1	0	24.41	1	0	0	0	0	6	5.98	4.31	20	139.7	0.53	0.42	3.84	0.26	10.6	26.2	18.1	2.65	0.2	0.16	0.22	1.46	0	0	0	0	17	0	0	5.63	4.17	14	1.15	0	0	0	0	0	14	9	14	1	0	9
19	26	31	1	0	31.4	1	0	0	0	0	4	4.92	7.64	9	174.4	1.24	0.45	3.85	0.25	11.02	25.93	18.44	3.15	0.3	0.23	0.43	1.77	1	0	0	0	13	0	0	5.9	4.86	15.78	1.13	0	1	1	0	0	8	12	9	1	0	10.42
20	33	30	1	0	22.7	1	0	1	1	0	3	6.53	9.72	20	57.54	1.94	0.49	3.66	0.26	11.5	24.5	17.9	3.31	0.25	0.21	0.35	0.94	1	0	0	0	11	0	0	4.9	4.88	16.82	1.82	0	0	0	0	0	10	10	12	1	1	10
21	30	30	1	0	20.35	1	0	1	1	0	3	7.6	19.87	16	212.9	0.633353	0.93	15.16	0.32	12.5	24.4	18.9	2.38	0.19	0.47	0.29	0.71	1	0	0	0	6	0	0	4.69	5.05	16.04	3.79	0	0	1	0	0	18	18	18	1	0	12
22	29	33	1	0	24.07	0	0	0	0	1	1	4.97	4.79	22	121	0.923384	1.48	1.01	0.13	10.9	28.2	16.3	2.74	0.21	0.17	0.35	0.8	0	0	0	0	9	0	0	4.98	5.25	14.64	3.67	0	0	1	0	0	1	7	10	1	1	10
23	26	26	1	0	19.72	1	0	1	0	0	2	6.02	18.58	21	196.7	1.8	0.38	7.15	0.05	12.4	29	17.6	2.88	0.27	0.06	0.29	0.93	0	1	1	1	13	0	0	5.1	5.04	16.07	1.87	0	0	1	0	0	21	18	20	1	0	12
24	33	38	1	0	29.45	1	0	0	0	0	11	7.24	9.83	21	138.3	0.701918	0.25	4.16	0.11	10.6	22.3	17.6	2.84	0.26	0.13	0.32	1.19	0	0	0	0	5	0	0	5.4	4.1	17.76	3.01	0	0	0	0	0	12	15	14	1	0	10
25	40	41	1	0	28.28	1	0	0	0	0	7	20.96	5.12	16	83.01	2.06	0.22	0.16	0.25	11	23.7	18.7	2.09	0.24	0.15	0.35	1.35	3	0	0	0	13	0	0	4.7	4.57	15.2	1.68	0	0	0	0	0	1	1	4	1	0	8
26	30	28	1	0	23.75	1	1	1	0	0	3	5.94	18.97	16	227.7	0.627706	0.11	18	0.07	11	25.4	18.7	2.04	0.27	0.19	0.32	1.33	1	0	0	0	15	0	0	4.45	4.78	19.59	1.72	0	0	1	0	0	15	14	7	1	0	10
27	30	30	1	0	26.92	0	0	0	1	0	7	1.87	0.16	18	125.2	0.761615	0.67	3.12	0.23	11.5	27.6	18.4	2.87	0.26	0.2	0.31	2.36	2	0	0	0	7	0	0	4.4	4.93	14.83	1.58	0	0	0	0	0	7	7	15	1	0	11
28	38	32	1	0	21.05	0	0	0	0	0	10	8.53	20.69	17	94.3	0.678154	0.45	1.37	0.07	11.1	25.9	17.3	2.88	0.26	0.13	0.46	0.55	2	0	0	0	25	0	0	5.29	4.46	17.67	2.73	0	0	1	0	0	4	4	9	1	0	9
29	32	31	1	0	24.49	1	1	1	1	0	2	3.91	0.9	28	61.39	0.45	1.62	2.96	0.42	9.4	22.7	17.3	3.08	0.23	0.38	0.32	1.24	1	0	0	0	14	0	0	5.9	4.57	14.06	1.98	0	0	1	0	0	6	4	15	1	0	10
30	28	31	1	0	26.06	1	1	1	1	0	2	8.65	3.12	10	143.2	0.21	0.78	4.19	0.24	11.4	27.2	18.8	2.31	0.22	0.22	0.35	1.5	1	0	0	0	12	0	0	5.2	4.49	15.17	0.97	1	1	1	0	0	9	8	14	1	0	12.5
31	31	32	1	0	20.22	0	0	1	1	0	1	5.55	4.83	7	155.1	0.638403	1.41	0.55	0.48	11.5	24.1	17.5	2.77	0.24	0.62	0.32	2.02	2	0	0	0	1	0	0	4.79	3.12	15.14	1.9	1	1	3	1	0	10	10	15	1	0	10
32	24	25	1	0	23.2	1	0	1	1	0	1	6.7	3.69	22	408.5	0.243069	1.04	3.39	0.27	11.8	27	20.5	1.56	0.22	0.24	0.29	2.32	1	0	0	0	5	0	0	4.65	5.58	17.64	1.86	0	0	1	0	0	10	8	10	1	0	11
33	28	31	1	0	18.44	1	0	0	1	0	1	3.05	0.85	21	200.9	0.800515	0.72	1.66	0.3	12.7	31.2	18.9	2.84	0.25	0.17	0.29	1.09	0	0	0	0	6	0	0	4.68	5.53	19.5	1.27	0	0	1	0	0	13	6	4	1	0	10
34	37	40	1	0	21.41	1	0	1	1	0	3	8.22	20.88	13	94	1.42	0.67	2.92	0.09	11.5	25.9	18.5	2.41	0.44	0.19	0.24	0.61	0	0	0	0	6	0	0	5.1	4.88	16.25	1.99	0	0	1	0	0	8	10	6	1	0	11
35	33	33	1	0	29.19	0	1	1	1	0	1	4.07	1.89	23	187.7	0.74	0.52	10.45	0.32	11	22	18.4	3.06	0.33	0.23	0.26	1.78	3	0	0	0	20	0	0	4.73	4.81	16.7	1.14	0	0	0	0	0	8	3	9	1	0	11
36	29	29	1	0	22.18	0	0	1	1	0	3	8.19	8.7	15	108	0.669381	0.76	2.88	0.25	11.3	23.6	18.9	3.11	0.23	0.16	0.43	1.74	1	0	1	0	20	0	0	4.63	4.79	15.6	3.93	0	1	0	0	0	5	5	10	1	0	9
37	34	31	1	0	24.03	0	1	0	1	0	2	9.95	3.13	23	56.8	0.23	0.99	3.94	0.48	11.2	24.9	19.9	2.52	0.24	0.33	0.35	4.45	1	0	0	0	25	0	0	5.26	5.03	17.2	1.86	1	1	0	0	0	9	5	19	1	0	8
38	33	31	1	1	18.06	1	0	0	1	0	2	12.43	2.32	15	123	0.546113	0.54	0.71	0.52	12	26.7	18.7	2.28	0.25	0.46	0.35	1.07	1	0	0	0	6	0	0	5.16	5.05	19.04	1.62	0	0	0	0	0	3	3	5	1	0	7
39	28	28	1	0	18.74	1	0	0	1	0	2	4.16	1.53	27	173.5	0.512121	0.77	4.04	0.34	10.8	26.8	19.5	2.13	0.33	0.33	0.24	1.03	0	0	0	0	8	0	0	4.95	4.97	14.43	1.73	0	0	1	0	0	3	4	11	1	0	11
40	32	33	1	0	22.73	1	0	0	0	0	4	3.16	2.76	24	125.5	0.570756	0.44	4.82	0.64	11.5	24.5	19.4	2.94	0.26	0.92	0.34	1.79	1	0	0	0	29	0	0	4.55	5.02	16.4	2.14	0	0	1	0	0	3	8	21	1	0	10
41	38	40	1	0	22.42	1	0	0	0	0	1	8.69	3.17	17	151.3	0.53	1.32	1.74	0.23	10.4	21.6	18.6	2.04	0.28	0.18	0.35	1.24	1	0	1	1	4	0	0	4.66	4.91	22.26	1.4	0	0	0	0	0	6	6	11	1	0	10
42	30	32	1	0	28.19	1	0	0	0	1	4	6.78	8.23	20	459.1	0.875015	1.12	15.64	0.18	10.9	27.6	18.9	2.59	0.25	0.22	0.34	1.16	2	0	0	0	14	0	0	5.56	4.79	16.58	2.04	0	0	1	0	0	13	12	10	2	0	11
43	31	32	1	0	21.18	1	1	1	0	0	4	5.96	16.87	22	202.7	1.18	1.19	5.36	0.37	11	22	18.4	3.54	0.23	0.3	0.28	0.79	0	0	0	0	33	0	0	4.43	4.77	17.44	1.48	0	0	1	0	0	8	10	4	2	0	11
44	30	29	1	0	30.26	1	0	1	0	0	4	5.59	7.53	11	139.4	0.613226	0.22	15.18	0.21	10.6	20.5	19	2.38	0.2	0.17	0.31	1.29	1	0	0	0	31	0	0	5.28	5.38	16.49	7.07	0	0	1	0	0	20	10	14	2	0	11
45	29	32	1	1	20.85	0	0	0	0	1	2	5.84	7.27	17	88.4	0.630202	0.41	3.41	0.21	12.3	33.6	18	2.49	0.22	0.18	0.28	1.14	2	0	1	0	10	0	0	4.62	4.7	14.48	0.86	1	0	1	0	0	10	10	13	1	0	11
46	34	34	1	0	22.25	1	0	0	0	0	6	2.95	5.23	18	707.6	1.13	0.26	2	0.25	11.3	25.1	18.1	2.74	0.27	0.11	0.35	0.91	2	0	0	0	20	0	0	4.4	4.76	17.59	2.03	0	0	0	0	0	5	2	17	2	0	14
47	35	35	1	0	22.38	0	1	1	0	1	6	7.31	3.4	22	241.7	0.37	1.51	3.44	0.28	10.3	21.4	19.1	2.18	0.25	0.08	0.34	1.72	0	0	0	0	16	0	0	4.3	4.43	14.94	2.68	0	0	1	0	0	7	8	5	1	0	12
48	27	32	1	0	25.11	0	0	0	0	0	1	6.8	4.8	20	101	1.5238	0.98	4	0.08	12.2	29.6	11.6	2.8	0.25	0.23	0.37	3.68	1	0	0	0	8	0	0	4.64	5.06	17.13	2.91	0	0	1	0	0	2	8	9	1	0	10
49	40	39	1	1	22.81	0	0	0	0	0	2	22.2	62.33	13	115.8	0.69	0.29	3.66	0.07	12.1	28.1	20.4	2	0.22	0.21	0.3	1.68	0	0	0	0	6	0	0	5.11	4.75	17.38	2.01	0	0	2	0	0	4	7	6	1	0	10
50	31	30	1	0	19.76	0	0	0	0	0	2	23.87	0.19	37	91.9	0.78	0.22	2.71	0.2	11.7	26.1	19.9	1.82	0.35	0.25	0.27	0.24	1	0	0	1	6	0	0	5.78	4.82	16.67	1.64	0	0	1	0	0	5	6	8	2	0	10
51	24	25	1	0	23.46	1	0	0	0	0	3	5.44	4.07	24	136.6	1.05	1.14	5.23	0.31	11.3	21.9	18.6	3.29	0.24	0.14	0.26	1.12	1	0	0	0	21	0	0	5.68	5.29	16.8	3.1	0	0	0	0	0	5	6	19	2	0	9
52	34	33	1	0	24.76	0	0	0	0	0	2	4.71	3.78	24	71.07	1.15574	1.98	11.37	0.14	10.6	21.4	18.8	2.53	0.52	0.19	0.32	0.25	3	0	0	0	9	0	0	5.3	5.22	16.65	1.78	0	0	1	0	0	10	11	10	2	0	9
53	23	29	1	0	25.31	1	0	0	0	1	3	7.22	7.31	21	783.8	1.41103	0.31	6.47	0.24	10.8	22.6	19.4	2	0.47	0.17	0.27	1.15	0	0	0	0	5	0	0	4.6	4.94	17.92	2.17	0	0	0	0	0	10	10	18	2	0	12
54	31	36	1	0	26.96	0	0	0	0	0	5	14.91	2.47	42	108.2	0.740509	1.17	6.25	0.64	11.2	0.96	2.6	16.8	0.23	0.14	0.26	1.49	2	0	0	0	7	0	0	5	4.44	14.16	2.27	1	1	1	0	0	6	4	13	1	0	10
55	30	29	1	0	22.7	1	1	1	0	0	5	4.09	6.42	21	161.1	0.15	2.13	5.72	0.18	11.8	24.2	18.5	2.52	0.46	0.22	0.31	1.69	1	0	0	0	9	0	0	4.95	5.19	16.14	2.11	0	0	1	0	0	9	8	10	2	0	10
56	24	26	1	0	22.19	1	0	0	1	1	2	8.39	1.08	10	126.2	0.94	0.66	4.35	0.33	11.7	26	18	3.36	0.42	0.25	0.23	1.21	2	0	0	0	8	0	0	5.09	5.16	17.74	1.84	0	0	1	0	0	10	10	13	2	0	10
57	33	38	1	0	20.85	0	0	0	1	0	7	9.42	5.96	23	182.1	0.914835	0.64	3.35	0.1	11.3	26.5	19.4	2.16	0.29	0.03	0.27	0.94	2	0	0	0	9	0	0	5.2	4.73	16.3	1.65	1	1	1	0	0	5	5	13	2	0	12
58	30	31	1	0	21.38	1	0	0	1	1	6	7.24	6.7	22	244.9	0.999417	0.88	8.5	0.27	12	29.1	18.9	2.49	0.27	0.26	0.38	1.24	2	0	1	0	7	0	0	5.1	4.97	16.53	1.89	0	1	0	0	0	10	10	9	2	0	12
59	25	26	1	0	23.78	1	0	1	1	0	1	4.9	7.37	22	553.8	0.635474	0.74	7.93	0.29	10.7	22.7	18.3	3.11	0.24	0.15	0.32	1.81	1	0	0	0	28	0	0	4.83	4.53	15.35	1.76	0	0	0	0	0	11	13	6	2	0	11
60	30	31	1	0	22.8	0	0	0	1	0	7	3.64	13.52	17	104.68	0.24	3.08	2.47	0.26	12.9	26.5	19.5	2.38	0.25	0.15	0.32	1.83	1	0	0	0	20	0	0	4.8	4.24	13.74	1.97	1	1	1	0	0	6	7	4	1	0	9
61	33	36	1	0	20.35	1	0	0	1	0	10	6.01	5.34	22	104.6	0.520152	0.82	1.4	0.19	10.6	23.2	19.4	2.44	0.2	0.32	0.37	1.53	2	0	0	0	6	0	0	5.8	5.13	18.63	0.92	0	0	1	0	0	3	1	11	2	0	12
62	26	25	1	0	24.18	1	0	0	0	0	2	5.07	5.76	23	80.89	0.99	0.12	1.25	0.37	11.7	28.4	18.7	2.84	0.25	0.34	0.35	1.78	0	0	1	0	15	0	0	4.6	5.18	15.16	1.99	0	0	1	0	0	3	3	19	2	0	10
63	26	30	1	0	28.75	1	0	0	0	0	5	8.79	10.99	12	102.6	0.725996	0.22	5.24	0.35	11.6	32.6	18.8	3.51	0.32	0.23	0.86	0.97	2	0	0	0	12	0	0	5.28	5.17	14.27	1.74	0	0	1	0	0	12	9	18	2	0	8
64	31	30	1	0	21.46	1	0	0	0	0	3	8.63	6.69	20	73.94	0.28	0.62	4.34	0.31	10.9	24.1	18.7	3.09	0.46	0.26	0.35	1.08	0	0	0	0	8	0	0	4.66	4.91	15.03	1.82	0	0	1	0	0	9	9	2	1	0	10.69
65	31	28	1	0	18.52	0	0	0	0	0	1	3.95	5.24	32	695	0.57	0.43	3.72	0.45	11.5	26.1	19.4	2.19	0.3	0.26	0.29	0.77	3	0	0	0	7	0	0	4.88	4.92	14.62	1.76	0	0	1	0	0	15	7	10	1	0	9
66	33	26	1	0	20.67	1	0	1	0	0	2	6.46	0.91	30	177.6	1.71	0.14	3.74	0.59	11.9	21	18.7	2.95	0.22	0.22	0.31	1.67	1	0	0	0	16	0	0	4.57	4.96	15.85	3.61	0	0	1	0	0	10	10	8	1	0	11
67	30	36	1	0	25.66	1	0	1	0	0	5	8.57	8.6	38	244.63	0.32	0.76	11.87	0.14	10.9	22.6	19.9	2.02	0.26	0.19	0.31	0.98	1	0	0	1	21	0	0	5.07	5.01	13.94	1.26	1	0	0	0	0	15	16	13	1	0	9
68	33	35	1	0	19.2	1	0	0	0	0	3	20.5	1.33	34	142.9	0.677198	1.42	1.91	0.24	11.1	25.6	19.4	2.86	0.22	0.16	0.28	0.78	2	0	0	0	18	0	0	4.97	5.87	13.26	2.54	1	1	0	0	0	4	4	15	1	0	12
69	29	29	1	0	22.61	1	0	0	0	0	3	5.84	4.25	24	125.8	0.504452	0.79	2.52	0.33	11.6	21.2	18.2	3.36	0.24	0.15	0.32	0.79	2	0	0	0	11	0	0	4.92	4.84	13.28	4.24	1	1	0	0	0	7	7	8	1	0	9
70	34	35	1	0	23.01	0	0	0	0	1	1	3.31	0.6	19	148.5	0.952817	1.05	3.9	0.39	12	22.9	19.8	2.49	0.24	0.33	0.3	0.57	0	0	1	0	10	0	0	4.96	4.68	16.06	1.16	0	0	0	0	0	8	6	10	1	0	10
71	30	30	1	0	21.87	1	0	0	1	0	3	3.54	38.27	18	226.82	1.3371	0.12	2.26	0.32	12.6	31.8	18.5	2.6	0.22	0.61	0.32	0.67	2	0	0	0	25	0	0	5.3	4.54	14.28	1.82	0	1	0	0	0	9	7	17	1	0	11
72	29	35	1	0	25.86	1	0	0	1	0	3	4.18	23.95	16	145.1	0.81	0.26	3.89	0.27	10.8	21	18.6	4	0.22	0.18	0.29	1.25	1	0	0	0	30	0	0	5.08	5.15	12.22	1.61	0	0	1	0	0	8	5	6	1	0	9
73	31	31	1	0	27.51	0	0	0	1	1	5	3.84	86.42	6	157.2	0.57835	1.06	2.27	0.21	12.7	26.6	20.1	3.41	0.25	0.18	0.28	1.72	2	0	0	0	16	0	0	5.21	4.56	15.11	0.52	0	0	0	0	0	8	9	7	1	0	11
74	32	34	1	0	20.7	1	0	0	0	1	9	7.1	9.06	25	203.7	0.484054	0.16	2.7	0.32	11.7	29.1	20.5	2.35	0.28	0.19	0.32	1.31	2	0	0	0	30	0	0	5.2	4.71	14.98	2.76	0	0	0	0	0	5	6	2	1	0	10
75	31	30	1	0	19.43	1	0	0	1	0	2	9.1	8.02	19	142.4	0.607621	0.25	2.63	0.2	11.7	24.7	18.3	2.94	0.27	0.17	0.3	1.84	1	0	0	0	16	0	0	4.65	4.46	14.11	2.6	1	1	0	0	0	6	7	4	1	0	9
76	30	29	1	0	24.66	1	0	0	0	0	4	9.39	7.14	21	133.4	3.13	0.92	3.56	0.11	11.6	30	16.6	3.21	0.27	0.15	0.36	1.85	0	0	0	0	8	0	0	4.48	4.78	14.55	2.16	0	0	0	0	0	8	9	12	1	0	12
77	34	35	1	0	21.24	1	0	0	1	0	7	9.92	28.04	17	173.8	0.672078	0.71	0.52	0.07	11	26.6	18.8	2.37	0.2	0.24	0.25	1.26	0	0	0	0	19	0	0	4.84	5.03	17.76	3.11	0	0	0	0	0	3	1	14	1	0	10
78	37	34	1	0	28.43	0	0	0	0	0	6	7.99	7.88	14	103.9	0.26	0.87	0.74	0.39	11.3	23.1	19	3.83	0.29	0.17	0.25	1.4	0	0	0	0	23	0	0	4.01	4.37	18.34	1.6	0	0	1	0	0	5	5	13	1	0	10
79	38	44	1	0	22.83	0	0	0	0	0	1	7.99	6	13	102.5	0.78	0.66	2.03	0.26	11.6	21.9	19	2.53	0.32	0.19	0.27	1.49	1	0	0	0	24	0	0	5.26	5.06	14.96	0.98	0	0	1	0	0	5	7	10	1	0	10
80	30	30	1	0	24.76	0	0	1	1	0	4	6.76	10.47	24	96.1	1.59	0.84	5.67	0.29	10.1	23.7	19	2.51	0.25	0.38	0.32	0.29	1	0	0	0	16	0	0	5.99	5.13	13.22	3.13	0	0	0	0	0	11	11	3	2	0	9
81	29	30	1	0	22.06	1	0	0	1	0	4	5.39	5.98	26	132.1	0.64842	0.44	4.99	0.29	12.5	25.9	18.3	2.52	0.26	0.16	0.3	1.29	0	0	0	0	7	0	0	5.25	5.15	16.4	2.18	0	0	0	0	0	12	11	17	1	0	9
82	39	39	1	0	22.73	0	0	0	1	1	9	6.85	5.45	14	222	0.946337	0.19	2.01	0.21	11.8	25.5	18	2.28	0.29	0.01	0.34	1.07	3	0	0	0	8	0	0	4.3	4.13	12.95	0.8	0	0	0	0	0	10	9	16	2	0	15
83	31	34	1	0	22.03	1	0	0	1	0	3	8.13	13.97	15	107.7	0.663872	0.86	5.07	0.11	11.3	23.3	19.7	1.77	0.55	0.19	0.32	1.05	1	0	0	0	8	0	0	5.53	4.98	15.14	0.7	0	0	1	0	0	14	10	7	2	0	11
84	32	34	1	0	20.74	1	0	0	1	0	2	5.96	6.72	22	140.4	0.53	0.16	2.19	0.33	11.2	24.5	19.1	2.38	0.22	0.17	0.27	0.6	2	0	0	0	9	0	0	4.28	5.42	16.27	0.92	0	0	1	0	0	6	2	14	2	0	13
85	35	36	1	0	25.55	1	0	1	1	0	8	3.9	3.19	16	150.1	0.886086	0.36	3.08	0.33	10.3	21.4	18.3	3.25	0.19	0.27	0.25	1.08	2	0	0	0	8	0	0	4.92	5.03	17.23	1.45	1	0	0	0	0	12	7	11	2	0	9
86	28	41	1	0	21.24	1	0	1	1	0	1	5.8	13.07	19	189.5	0.543189	0.64	4.38	0.17	10.5	21.4	19.4	3	0.24	0.22	0.27	1.85	0	0	0	0	20	0	0	4.89	4.47	15.11	3.43	1	1	0	0	0	9	11	7	2	0	8
87	33	31	1	0	22.73	1	0	0	1	0	2	5.1	2.55	23	141.4	1.1	0.21	2.5	0.54	11.8	21	19	3.83	0.24	0.46	0.28	0.25	1	0	0	0	15	0	0	4.84	5.21	15.65	1.88	0	0	0	0	0	8	8	2	2	0	11
88	33	33	1	0	21.45	1	0	0	1	0	4	11.7	9.94	21	125.3	0.500645	1.05	2.47	0.13	11.1	26.5	18.8	2.74	0.28	0.16	0.29	0.75	0	0	0	0	9	0	0	4.41	4.65	15.46	1.61	0	0	1	0	0	7	8	3	2	0	8
89	31	30	1	0	19.38	1	0	0	1	0	1	7.61	4.48	17	163.6	0.412082	0.2	0.91	0.16	13.4	28	12	2.3	0.23	0.2	0.29	1.18	0	0	0	0	12	0	0	4.92	3.82	1.56	1.79	1	0	1	0	0	4	0	6	2	0	10
90	31	33	0	0	25.91	1	0	0	1	0	3	1.07	1.69	17	106.6	1.10842	0.76	0.96	0.24	11.7	23.3	18.8	2.45	0.27	0.2	0.52	1.83	3	0	0	0	8	0	0	4.66	4.41	13.11	1.43	1	0	1	0	0	5	3	7	2	0	13
91	30	29	0	1	28.85	1	0	1	1	0	4	5.92	7.29	19	940.1	0.582057	0.66	6.65	0.16	11.4	27.2	17.4	3.44	0.23	0.18	0.3	1.61	2	0	0	0	24	0	0	4.86	6.01	13.66	2.33	0	0	1	0	0	9	8	5	2	0	10
92	28	28	0	0	23.39	1	0	0	1	0	1	6.7	5.29	22	434.6	0.59	1.29	0.89	0.27	11	22.1	19.4	3.22	0.25	0.16	0.33	1.14	2	0	0	0	12	0	0	4.68	5.28	16.7	2.72	0	0	1	0	0	2	2	9	2	0	9
93	33	36	0	0	23	1	0	0	1	0	1	10.6	8.95	24	103.3	0.42	0.25	1.95	0.27	12.6	26.3	17.8	2.53	0.25	0.14	0.29	1.77	2	0	0	0	31	0	0	4.82	4.85	16.66	0.62	0	0	1	0	0	5	4	15	2	0	9
94	39	38	0	0	22.98	0	0	0	1	0	2	7.86	5.24	30	117.2	0.88	0.34	1.19	0.25	10.6	21.5	18.8	3.09	0.24	0.17	0.86	0.66	3	0	0	0	6	0	0	5.25	4.99	14.11	2.17	0	1	1	0	0	5	7	8	2	0	7
95	32	33	1	0	22.03	1	0	0	1	0	2	6.85	2.95	13	182.73	1.28	0.26	6.11	0.26	11.3	25.7	19	2.23	0.26	0.17	0.42	1.61	2	0	0	0	7	0	0	4.8	4.82	20.52	3.13	0	0	0	0	0	13	8	7	2	0	11
96	31	30	1	0	23.59	1	0	0	1	0	7	1.75	4.06	25	208	0.57	0.99	1.12	0.41	11	23.9	18.9	3.63	0.31	0.2	0.4	0.81	3	0	0	0	20	0	0	4.9	4.53	15.5	1.5	0	0	1	0	0	8	6	6	2	0	10
97	31	31	1	0	23.01	1	0	0	1	0	3	6.77	5.29	36	109.48	0.63	0.12	2.74	0.15	10.9	24.8	18.9	2.7	0.24	0.16	0.66	2.06	2	0	0	0	20	0	0	5.04	4.85	18.68	0.99	0	0	1	0	0	3	3	14	2	0	10.53
98	35	35	1	0	20.72	0	0	0	1	0	4	5.37	1.99	10	132.5	1.32125	0.62	3.22	0.25	11.3	22.2	18.5	1.86	0.3	0.21	0.37	0.91	3	1	0	0	8	0	0	4.97	4.91	16.12	0.94	0	0	1	0	0	5	7	11	1	0	12
99	35	35	1	0	20.84	0	0	0	1	0	1	10	6.43	28	173.52	0.581555	3.02	2.27	0.33	11.4	25.2	16.9	2.81	0.25	0.33	0.3	1.74	0	0	0	0	25	0	0	4.6	4.66	14.35	1.93	0	0	1	0	0	6	6	16	2	0	12
100	34	37	1	0	28.49	1	0	0	1	0	4	3.15	35.12	12	566.7	2.2	1.04	2.67	0.1	11.2	22.5	18.1	3.36	0.45	0.15	0.45	2	2	0	0	0	20	0	0	4.76	5.93	18.59	2.54	0	0	0	0	0	8	10	8	2	0	12
101	34	30	1	0	20.93	0	0	0	1	0	3	2.76	14.63	16	178.77	1.29	0.45	5.23	0.13	12.5	26.8	18.5	2.01	0.25	0.18	0.3	0.82	1	0	0	0	5	0	0	5.33	4.12	18.2	1.47	0	0	1	0	0	9	9	8	1	0	11
102	29	29	1	0	18.52	0	0	0	0	0	1	8.23	3.46	12	118.3	0.641493	0.95	2.56	0.42	18.2	26.22	18.2	1.75	0.25	0.14	0.38	0.25	1	0	0	0	7	0	0	5.2	4.42	15.01	3.03	0	0	0	0	0	13	12	17	2	0	10
103	35	37	1	0	32.54	0	0	1	0	0	9	5.64	12.13	8	328.4	0.710823	0.57	8.21	0.41	11.2	22.9	19.9	3.74	0.25	0.34	0.29	0.4	2	0	0	0	30	0	0	5.39	4.74	17.38	0.95	0	0	1	0	0	29	28	10	2	0	12
104	33	33	1	0	17.47	0	0	1	0	0	6	5.91	13.96	7	131	0.21	0.61	10.3	0.53	11.4	30.2	0.92	3.28	0.19	0.28	0.43	2.08	1	0	0	0	10	0	0	4.81	4.57	14.86	2.26	0	0	1	0	0	9	12	7	2	0	9
105	30	33	1	0	20.47	0	0	0	0	0	3	4.79	4.67	21	125.1	0.603117	0.91	2.06	0.31	11.5	22.2	18.2	2.45	0.25	0.18	0.26	0.68	2	0	0	0	17	0	0	4.67	4.68	14.31	1.4	0	1	1	0	0	6	9	13	1	0	9
106	28	29	1	0	22.61	1	0	0	0	0	2	10.58	7.81	18	223.4	0.83	0.67	3.26	0.13	10.8	25.3	18.6	2.35	0.23	0.18	0.3	0.94	1	0	0	0	8	0	0	4.54	4.88	16.83	1.8	0	0	0	0	0	7	10	13	1	0	13
107	39	42	1	0	25.54	0	0	1	0	0	2	7.82	5.21	22	278.2	0.635739	1.14	2.55	0.56	10.7	20.9	19.7	2.9	0.24	0.76	0.41	0.54	0	0	0	0	18	0	0	4.88	5.31	14.5	2.14	1	1	0	0	0	6	6	12	2	0	13
108	30	28	1	0	24.2	1	0	1	0	0	3	7.44	8.15	22	160.4	0.563794	0.59	5.2	0.43	12.5	29.3	17.6	1.99	0.27	0.66	0.86	0.86	2	0	0	0	6	0	0	5.4	4.11	14.87	1.86	1	0	0	0	0	12	11	4	1	0	13
109	34	38	1	0	25.78	1	0	1	0	0	10	7.38	3.34	20	137.7	0.406647	1.88	10.41	0.36	9.5	20.1	17.7	4.49	0.23	0.36	0.37	1.14	0	0	0	0	22	0	0	4.97	4.97	16.94	9.1	1	0	1	0	0	10	10	8	2	0	12
110	36	34	1	0	21.45	0	0	1	0	0	1	7.99	6.37	19	98.7	0.81	2.02	4.73	0.36	11.5	23	19	2.82	0.23	0.2	0.33	2.13	1	0	0	0	26	0	0	4.35	4.4	15.23	1.11	0	0	1	0	0	5	6	11	2	0	13
111	34	37	1	0	24.84	1	0	0	0	0	5	7.59	5.98	19	195.44	0.854371	0.7	1.87	0.31	11.8	31.4	17.1	3.79	0.26	0.46	0.41	0.77	1	0	0	0	23	0	0	5.44	4.73	14.27	1.72	0	0	1	0	0	10	6	17	2	0	9
112	38	38	1	0	20.35	1	0	0	0	0	5	9.79	1.12	22	496	1.38	0.9	1.66	0.35	11.7	21.3	20.5	2.59	0.24	0.16	0.3	1.14	0	0	0	0	20	0	0	5.41	5.06	19.02	2.55	0	0	0	0	0	5	5	9	2	0	9
113	27	31	0	0	20.98	1	0	1	0	0	2	5.74	4.59	23	186.5	0.709709	0.61	4.14	0.33	12.2	25.6	18.7	2.42	0.25	0.21	0.46	1.69	1	0	0	0	6	0	0	4.72	4.63	14.91	1.97	0	0	0	0	0	8	6	4	2	0	12
114	27	32	0	1	27.45	1	0	1	0	0	5	6.64	3.72	20	59.86	1.38	1.08	2.74	0.26	10.7	21.1	19.9	2.13	0.23	0.17	0.31	2.01	1	0	0	0	7	0	0	5.25	4.74	15.46	2.62	0	0	1	0	0	12	14	13	1	0	14
115	30	30	0	0	21.23	1	0	0	0	0	2	6.64	4.83	16	105.84	0.74	1.04	1.76	0.29	10.8	22.2	19.4	2.7	0.23	0.26	0.26	1.24	1	0	1	0	13	0	0	4.77	4.95	16.53	1.72	0	0	0	0	0	5	4	25	2	1	10.23
116	34	32	0	0	24.95	0	0	1	0	0	1	6.42	7.18	16	136.1	0.737311	0.26	4.23	0.19	11.8	23.7	19.2	2.77	0.24	0.18	0.31	0.52	0	0	0	0	13	0	0	5.4	5.32	17.34	1.33	0	0	0	0	0	8	12	14	2	0	12
117	32	32	1	0	22.81	1	1	0	0	0	2	5.52	3.91	39	158.9	1.4	0.9	3.77	0.36	12.3	24.7	20.3	2.78	0.29	0.22	0.29	0.92	0	0	0	0	10	0	0	5.08	4.4	14.11	2.6	0	0	0	0	0	8	13	12	1	0	11
118	29	32	1	0	28.84	1	1	1	0	0	3	9.55	2.48	16	124.64	0.443512	0.92	4	0.39	10.6	26.2	17.7	3.74	0.2	0.15	0.25	1.3	2	0	0	0	27	0	0	4.94	4.87	17.08	1.22	0	0	0	0	0	14	13	4	1	0	9
119	26	28	1	0	23.3	0	0	0	0	0	1	6.24	6.45	21	159.2	0.97	2.09	5.96	0.26	10.5	21.5	18.9	2.78	0.28	0.18	0.3	2.28	0	0	0	0	11	0	0	4.81	5.27	13.35	3.21	0	0	0	0	0	15	12	11	1	0	11
120	26	28	1	0	20.55	1	0	0	0	0	1	5.9	7.49	19	89.3	0.14	1.04	3.82	0.29	11	24.7	19.4	2.66	0.32	0.17	0.31	1.62	2	0	0	0	5	0	0	4.1	4.64	16.09	1.73	0	0	0	0	0	11	12	10	1	0	12
121	34	35	1	0	23.18	1	0	1	0	0	1	15.83	24.05	15	530.9	0.5	2.75	0.74	0.28	11.1	24.1	18.6	2.83	0.23	0.14	0.27	0.25	2	0	0	0	6	0	0	5.16	5.27	15.37	1.27	0	0	1	0	0	2	2	10	2	0	8
122	29	32	1	0	18.53	1	0	0	0	0	4	9.22	5.02	25	175.12	0.79	1.36	1.46	0.15	11.9	28.4	18	2.22	0.21	0.18	1.21	0.96	0	0	0	0	8	0	0	4.49	5.72	17.87	2.01	0	0	1	0	0	2	6	10	2	0	12
123	31	34	1	0	22.56	1	1	0	0	0	5	2.97	1.37	50	96	0.75	0.28	1.47	0.49	0.93	12.4	0.93	15.6	0.17	0.85	0.42	0.89	1	0	0	0	7	0	0	4.21	4.32	15.3	1.37	0	0	0	0	0	4	4	9	2	0	13
124	39	37	1	0	24.24	0	0	0	0	0	4	13.53	3.9	15	130.84	0.24	1.23	1.73	0.26	10.8	26.5	17.6	2.15	0.31	0.21	0.32	1.15	0	0	0	0	5	0	0	4.17	4.24	15.72	0.83	0	0	0	0	0	8	9	17	2	0	7.5
125	39	39	0	0	23.59	0	0	0	0	0	1	6.46	4.3	17	102.4	0.19	0.61	0.56	0.32	11.1	23.6	20.8	2.05	0.24	0.16	0.35	1.35	2	0	0	0	7	0	0	5.46	4.52	13.96	1.63	0	0	0	0	0	6	5	11	1	0	9
126	30	30	1	0	28.55	0	0	0	0	0	5	8.24	5.2	13	687.6	0.603737	1.23	1.31	0.39	11.3	23.1	20.6	2.82	0.26	0.2	0.25	0.92	2	0	0	0	6	0	0	4.67	4.67	14.14	2.1	0	0	1	0	0	7	5	12	2	0	12
127	31	32	1	0	25.56	0	0	0	0	0	1	7.98	3.46	15	225.3	0.807824	0.94	2.24	0.14	11.2	33.1	16	1.9	0.31	0.18	0.41	0.49	1	0	0	0	15	0	0	4.5	4.83	16.86	1.29	1	0	1	0	0	12	18	6	1	1	14
128	30	39	1	0	22.19	0	0	0	0	0	5	7.86	5.56	15	605.2	0.412448	1.35	2.77	0.33	12.2	26.5	20.4	2.08	0.33	0.26	0.28	1.15	1	0	0	0	14	0	0	4.46	5.03	17.67	2.03	0	0	0	0	0	6	7	15	2	0	11
129	28	27	1	0	19.77	0	0	0	0	0	1	6.2	9.85	37	384.2	0.810428	1.74	2.94	0.33	11.7	23.4	18.7	2.31	0.28	0.18	0.28	1.39	0	0	0	0	7	0	0	5.02	5.07	13.41	5.87	1	1	1	0	0	12	7	20	2	0	10
130	35	39	1	1	21.14	0	0	0	0	0	3	11.34	4.76	19	65.44	0.65	0.67	1.75	0.29	12.1	24.7	18.8	2.23	0.25	0.19	0.27	0.87	3	0	0	0	10	0	0	5.25	4.57	12.94	3.71	0	0	1	0	0	11	6	17	2	0	8
131	29	30	1	0	21.45	1	0	0	0	0	2	9.12	3.25	24	374.2	0.58	1.23	4.26	0.26	10.8	25.5	16.9	2.11	0.26	0.15	0.31	0.25	2	0	0	0	25	0	0	4.99	5.08	18.46	1.38	0	0	1	0	0	8	9	5	1	0	10
132	36	31	1	0	22.04	0	0	1	0	1	4	4.21	1.36	23	181.72	0.74	0.71	4.33	0.36	11.1	22.7	19.9	2.41	0.63	0.31	0.4	2.08	2	0	0	0	8	0	0	6.75	4.46	14.22	1.48	0	0	1	0	0	15	18	14	1	0	11
133	36	32	1	0	26.32	0	0	0	1	0	1	9.14	3.28	22	167.72	0.91	0.52	2.3	0.39	11.2	28.9	15.3	2.52	0.25	0.33	0.38	1.97	0	0	0	0	9	0	0	4.4	5.25	10.14	1.17	0	0	0	0	0	3	2	4	1	0	9
134	40	39	0	0	25.3	1	0	1	0	0	1	14.72	0.05	22	199.7	0.480349	1.42	1.19	0.33	11.3	26.6	19	3.35	0.38	0.29	0.33	1.87	2	0	0	0	21	0	0	5.33	5.03	15.48	1.69	0	0	1	0	0	2	8	8	2	0	9
135	31	31	0	0	31.01	0	0	0	0	0	5	13.14	4.41	17	720.1	0.47	0.71	2.48	0.38	11.8	23.4	17.4	3.44	0.23	0.14	0.28	1.97	1	0	0	0	25	0	0	5.04	4.71	15.17	2.38	0	1	0	0	0	6	6	3	2	0	9
136	36	36	0	0	23.66	1	0	1	0	0	6	13.21	1.5	8	90.88	0.783326	1.62	0.44	0.09	10.6	30.2	16.6	2.99	0.24	0.15	0.25	3.92	2	0	0	0	6	0	0	4.92	4.71	14.46	1.32	0	0	1	0	0	2	0	20	2	0	10
137	31	32	0	0	19.48	1	0	1	1	0	6	9.53	6.15	15	421.1	0.15	0.3	3.49	0.21	11.3	26.5	17.9	2.42	0.51	0.29	0.44	0.66	2	0	0	0	6	0	0	5.41	5.88	17.13	2.35	0	0	0	0	0	7	12	7	2	0	11
138	31	28	0	0	20.1	1	0	0	0	0	4	25.27	3.76	22	68.88	0.41	0.51	0.18	0.22	12.2	25.8	19.8	2.24	0.26	0.14	0.28	1.54	2	0	0	0	8	0	0	5.16	5.12	17.56	0.66	0	0	1	0	0	3	4	13	2	0	11
139	27	29	0	0	27.7	1	0	0	0	0	4	6.07	11.02	20	214	1.19	1.24	6.25	0.24	11.3	28.4	19.6	2.9	0.26	0.2	0.28	1.53	2	0	0	0	16	0	0	5.1	4.98	16.57	3.19	0	0	0	0	0	5	6	15	1	0	11
140	39	40	0	0	23.04	1	0	0	0	0	6	18.23	3.09	19	938	1.04353	3.88	2.94	0.2	10.9	24.6	16.7	2.49	0.22	0.26	0.29	0.83	0	0	0	0	10	0	0	4.66	5.01	15.1	1.98	0	0	1	0	0	7	8	6	2	0	11
141	30	31	0	0	17.16	1	1	0	0	0	1	15.3	2.6	13	90.3	0.57241	1.11	2.94	0.25	10.9	24.5	19.9	1.89	0.24	0.15	0.29	0.8	2	0	0	0	8	0	0	5.1	5.08	15.58	3.83	0	1	1	0	0	7	6	6	1	0	12
142	27	31	0	0	20.46	0	0	0	0	0	1	9.34	2.91	16	224.6	1.86	0.85	3.26	0.41	12.3	30.2	17.2	2.39	0.27	0.21	0.25	2.22	1	0	0	0	11	0	0	3.9	4.6	12.57	1.57	0	0	1	0	0	9	6	12	1	0	9
143	37	43	0	0	22.19	1	0	0	0	0	2	8.98	4.78	17	534.1	0.65	0.34	2.94	0.39	10.9	22.5	18.7	2.35	0.29	0.53	0.37	0.87	3	0	0	0	5	1	0	4.7	4.19	17.54	0.6	0	0	1	0	0	5	6	3	2	0	10
144	31	31	0	0	26.96	1	0	0	0	0	3	15.86	4.96	21	73.12	0.76	1.08	0.87	0.43	10.6	20.1	16.9	2.65	0.25	0.22	0.26	1.68	1	0	0	0	10	0	0	4.79	5.17	17.01	1.28	0	1	0	0	0	4	3	13	1	0	10
145	33	33	0	0	20.22	1	0	0	0	0	3	9.52	5.64	24	331.7	0.659068	0.93	3.2	0.23	12.3	34.4	16.2	3.5	0.32	0.19	0.28	1.48	2	0	0	1	8	0	0	4.77	5.22	14.18	1.28	0	0	1	0	0	8	8	3	2	0	13
146	29	34	0	0	30.42	0	1	0	0	0	6	2.62	3.51	13	548.5	0.647404	0.23	2.04	0.3	11.5	22.1	19.5	2.91	0.26	0.29	0.27	1.95	0	0	0	0	24	0	0	5.42	4.58	15.84	1.2	0	0	2	0	0	2	8	10	2	0	10
147	30	30	0	0	26.57	1	0	0	1	1	3	5.86	4.81	40	113.8	0.493343	2.38	2.57	0.45	11.7	28.5	19.2	4.12	0.25	0.24	0.26	1.89	2	0	0	0	26	0	0	5.99	4.93	17.08	1.3	0	1	1	0	0	11	12	7	2	0	10.71
148	27	28	0	0	27.49	0	0	1	0	0	2	12.67	2.33	12	287.3	0.763232	0.54	0.23	0.28	11.1	21.5	18.9	2.57	0.24	0.16	0.33	1.62	3	0	0	0	13	0	0	4.7	4.17	15.11	3.2	0	0	1	0	0	2	2	8	2	0	10
149	31	31	0	0	18.22	1	1	0	0	1	3	12.65	2.91	23	639.3	1.15	0.35	2.56	0.06	11.2	30.3	15.3	2.28	0.26	0.02	0.36	1.21	0	0	0	0	2	0	0	5.49	5.19	15.53	1.93	0	0	1	0	0	8	7	10	1	0	11
150	28	32	0	0	26.72	0	0	0	0	0	3	6.12	5.69	21	129.5	1.08	0.33	2.07	0.11	11.7	35.5	17.2	2.74	0.26	0.17	0.3	2.08	0	0	0	0	8	0	0	5.48	5.1	15.97	1.72	0	1	0	0	0	7	7	6	2	0	11
151	37	38	1	0	21.37	0	0	0	0	0	3	11.48	1.16	20	291.1	1.02127	1.02	2.18	0.29	11.7	23.6	17.5	2.44	0.26	0.18	0.29	0.37	1	0	0	0	5	0	0	4.87	3.9	15.13	1.86	1	1	1	0	0	4	4	3	2	0	9.5
152	30	30	1	0	17.73	1	1	0	0	0	1	13.46	4.95	22	131.3	0.48	0.5	6	0.24	11.4	27	16.3	2.7	0.25	0.2	0.3	2.76	2	0	0	0	7	0	0	4.64	4.89	14.18	2.6	0	0	1	0	0	10	11	6	2	0	11
153	41	41	1	0	26.44	0	0	1	0	0	1	6.56	4.32	13	84.44	0.17	1.18	1.2	0.22	11	24.7	17.6	2.57	0.24	0.21	0.3	1.24	2	0	0	0	12	0	0	5.15	4.74	13.63	1.99	0	0	1	0	0	3	4	15	1	0	10
154	33	28	1	0	26.19	0	0	0	0	0	2	15.99	3.18	17	76.74	0.9	1.22	1.19	0.26	12.5	30.1	17	2.64	0.28	0.24	0.31	0.7	2	0	0	0	15	0	0	5.11	4.99	17.5	1.03	0	0	1	0	0	5	4	3	2	0	13
155	29	30	1	0	23.81	1	0	0	0	0	4	6.62	4.18	20	147.5	1.09	0.62	7.42	0.18	10.9	23.8	17.3	2.54	0.24	0.17	0.26	1.79	1	0	0	0	14	0	0	5.14	4.49	16.36	1.28	0	0	1	0	0	8	8	9	2	0	13
156	31	30	1	0	18.93	0	0	1	0	0	3	5.75	5.05	10	109.56	1.32	0.78	4.63	0.19	11.6	29.3	18.3	2.66	0.24	0.18	0.26	2.43	1	0	0	0	9	0	0	5.1	4.03	16.13	1.95	0	0	1	0	0	13	10	7	2	0	13
157	34	35	0	0	29.45	0	0	0	0	0	2	17.13	2.52	16	172.7	0.98	0.61	2.99	0.18	10.8	31.6	16.8	2.91	0.27	0.3	0.36	0.76	0	0	0	0	8	0	0	4.8	5.22	15.83	1.16	0	0	1	0	0	7	7	9	2	0	9.84
158	32	37	0	1	23.77	1	0	1	0	0	4	17.76	1.15	32	255.7	0.660141	0.93	2.26	0.29	11.9	30.4	17.2	2.65	0.26	0.32	0.27	0.47	1	0	0	0	11	0	0	5.42	4.49	15.98	1.55	0	0	1	0	0	5	5	6	2	0	10
159	33	37	0	0	19.62	0	0	0	0	0	3	6.93	5.15	14	282.9	0.576189	0.66	1.97	0.15	11.6	27.1	17	2.25	0.26	0.2	0.26	0.86	1	0	0	0	7	0	0	4.59	4.71	13.32	1.02	0	0	2	0	0	6	4	8	2	0	6
160	37	38	0	0	28.59	0	0	0	0	0	1	13.05	0.05	21	470.3	0.85181	1.21	7.8	0.43	10.3	20.1	19.8	2.49	0.25	0.24	0.27	1.51	1	0	0	0	14	0	0	4.13	5.41	14	1.09	0	0	1	0	0	5	5	8	2	0	10
161	39	41	0	0	19.68	0	0	1	0	0	2	12.45	2.93	20	250.1	1.08	1.9	0.51	0.2	10.7	27.5	17.9	2.06	0.39	0.15	0.3	0.54	2	0	0	0	4	0	0	4.73	4.77	14.6	1.53	0	0	1	0	0	2	2	12	1	0	9
162	33	33	0	0	21.38	1	0	0	1	0	8	6.18	4.87	27	90.5	0.44	0.58	2.75	0.14	11.7	25.7	19.4	1.78	0.3	0.18	0.23	0.23	2	0	1	0	4	0	0	5.35	5.22	18.48	2.4	0	0	1	0	0	5	5	16	1	0	11
163	36	36	0	0	24.32	1	0	0	0	0	6	7.59	5.85	17	87.54	0.518507	3.77	2.42	0.12	11.2	24.4	18.7	1.9	0.27	0.15	0.29	1.15	2	0	0	0	8	0	0	5.2	4.53	13.35	2.32	0	0	1	0	0	8	10	15	2	0	10
164	35	36	0	0	27.46	0	0	0	0	0	2	5.87	4.72	21	757.2	1.47	0.14	1.94	0.25	11.9	35	18	2.6	0.26	0.18	0.28	0.54	0	0	0	0	9	0	0	5	5.43	9.95	1.17	0	0	0	0	0	6	6	12	2	0	11
165	28	28	0	0	20.96	1	0	0	0	0	2	14.24	0.22	32	373.4	0.36	0.24	4.97	0.45	11.2	28.3	17.8	2.4	0.23	0.16	0.31	1.26	1	0	0	0	5	0	0	4.65	5.01	15.72	1.94	0	0	1	0	0	5	7	4	2	0	1
166	33	45	0	0	21.45	1	0	0	0	0	9	6.18	4.08	20	63.83	0.607432	0.52	1.47	0.15	10.8	24.5	16.8	2.89	0.23	0.16	0.32	2.22	1	0	0	0	7	0	0	4.86	5.49	15.77	2.3	0	0	1	0	0	5	8	5	2	0	6
167	32	29	1	0	28.07	1	0	0	0	0	3	10.63	0.46	50	135.2	0.98	0.56	2.67	0.27	10.4	25.9	18.5	2.54	0.23	0.15	0.29	1.86	2	0	0	0	5	0	0	4.26	4.94	14.44	1.83	0	0	1	0	0	5	7	2	2	0	10
168	34	37	1	1	21.16	0	0	0	0	0	2	14.74	1.23	17	162.6	1.18	0.51	1.01	0.14	11.1	31.5	16.7	2.89	0.25	0.19	0.25	1.83	1	0	0	0	22	0	0	4.4	5.68	16.85	1.26	0	0	2	0	0	7	6	11	1	1	8
169	35	37	1	0	20.35	1	0	0	0	0	8	20.5	7.05	26	184	0.707318	1.09	1.18	0.1	11.6	25.6	16.9	2.06	0.28	0.2	0.43	1.79	3	0	0	0	5	0	0	4.68	5.16	14.69	3.06	1	1	0	0	0	3	3	2	2	0	10
170	31	34	1	0	20.85	1	0	0	0	0	5	10.29	10.56	25	85.21	0.621582	0.57	1.05	0.1	10.9	30	17.2	3.09	0.31	0.16	0.28	0.89	2	0	0	0	7	0	0	4.7	4.52	17.46	2.71	0	0	0	0	0	2	3	12	2	0	10
171	27	29	1	0	21.91	1	0	0	0	0	3	8.51	4.24	21	548.9	0.85	0.75	2.74	0.25	10.8	20.6	19.9	2.49	0.26	0.17	0.31	1.48	0	0	0	0	21	0	0	5.22	4.51	14.64	2.12	1	0	0	0	0	8	11	12	2	0	11
172	32	34	1	0	31.01	1	0	1	0	0	4	11.17	8.65	17	139.7	0.59	0.76	1.89	0.11	11	25.6	16.5	3.14	0.25	0.2	0.38	2.42	2	0	0	0	10	0	0	4.75	5.54	12.68	5.76	0	0	1	0	0	10	10	15	2	0	10
173	35	36	1	0	23.88	1	0	0	0	0	2	11.63	5.44	6	99.8	0.2	1.1	3.52	0.42	11.6	30.1	16.8	2.96	0.26	0.26	0.3	0.63	1	0	0	0	6	0	0	4.48	4.75	13.93	1.79	0	0	1	0	0	8	8	4	2	0	10
174	29	31	1	0	20.66	1	0	0	0	0	4	12.2	2.14	13	121.2	0.458925	0.88	2.32	0.18	11.3	29	17.6	2.4	0.24	0.24	0.31	0.96	2	0	0	0	24	0	0	5.52	5.76	14.25	1.6	0	0	1	0	0	5	8	6	2	0	10
175	27	24	1	0	22.46	1	0	0	0	0	2	5.57	5.8	22	69.84	0.99	0.61	2.7	0.43	11.4	26.4	17	2.68	0.25	0.73	0.3	1.1	1	0	0	0	12	0	0	4.46	5.47	13.29	1.76	0	0	0	0	0	8	9	11	1	0	10
176	40	39	1	1	29.29	1	0	0	0	0	3	8.98	4.4	16	85.36	0.32	0.15	0.59	0.34	10.7	26.4	18.3	3.97	0.23	0.23	0.32	0.25	2	0	0	0	13	0	0	4.34	4.55	14.91	1.18	0	0	0	0	0	4	1	10	2	0	9
177	30	32	0	0	19.3	1	0	0	0	0	2	8.2	7.05	20	117.4	1.22	0.61	1.68	0.15	11.6	27.3	17.1	2.71	0.35	0.16	0.28	1.52	2	0	0	0	20	0	0	4.33	5.6	13.22	0.82	1	1	1	0	0	5	3	6	2	0	10
178	31	29	0	0	20.84	1	0	0	0	0	3	5.56	8.56	7	120	0.641209	0.28	1.11	0.34	11.8	25.2	17.3	3.1	0.3	0.23	0.27	1.84	2	0	0	0	6	0	0	4.7	3.11	1.45	2.35	0	0	0	0	0	3	7	6	2	0	10.31
179	30	31	0	0	21.37	1	1	0	0	0	2	5.6	4.82	23	300.5	1.41897	0.56	5.99	0.15	11.1	24.7	17.6	2.68	0.23	0.17	0.32	1.53	1	0	0	0	9	0	0	5.55	4.9	18.28	1.89	0	0	0	0	0	12	12	7	2	0	10
180	37	38	1	0	18.67	0	0	0	0	0	3.5	17.33	5.64	21	203.7	0.466172	0.22	0.69	0.18	11.1	28.4	17.5	2.21	0.26	0.19	0.26	1.11	1	0	0	0	5	0	0	5.02	4.03	14.52	2.84	0	0	0	0	0	2	2	4	1	0	10
181	30	33	1	0	21.87	1	0	0	0	0	2	6.19	4.03	30	126.1	0.629694	1.03	1.93	0.26	11.4	27	18.1	2.42	0.3	0.32	0.3	1.01	0	0	0	0	7	0	0	5.02	5.47	15.06	1.74	0	0	1	0	0	4	5	13	2	0	11
182	31	31	1	0	20.85	1	1	0	1	0	3	6.24	3.16	19	907.8	0.740801	0.54	1.96	0.36	12.2	27.1	16.6	3.2	0.39	0.42	0.27	0.25	0	0	0	0	14	0	0	4.35	4.81	14.19	2.08	0	0	1	0	0	5	5	9	2	0	11
183	32	34	1	0	29.82	1	1	0	0	0	8	6.34	5.43	11	157.1	0.45	0.45	1.75	0.11	11.8	26.8	17.9	2.68	0.24	0.14	0.29	0.84	2	0	0	0	13	0	0	4.87	5.75	16.68	2.19	1	0	1	0	0	6	5	4	2	0	15
184	36	40	1	0	24.8	0	0	0	0	0	4	3.62	0.39	26	195.48	0.59	0.31	5.53	0.12	11.5	26.6	18.2	2.46	0.23	0.21	0.26	1.7	2	0	0	0	12	0	0	5.38	5.68	13.02	7.86	0	0	0	0	0	3	8	2	2	0	11
185	27	28	1	0	21.66	1	0	0	0	1	3	11.55	4.27	31	84.82	0.847705	0.11	20	0.39	11	25.5	17.6	2.7	0.42	0.94	0.28	1.78	1	0	0	0	8	0	0	4.48	4.83	13.03	4.18	0	0	1	0	0	3	3	3	2	0	10
186	31	31	1	0	19.58	1	1	0	0	1	6	8.01	4.63	21	156.4	0.986035	0.12	0.91	0.16	12.4	30.7	17.2	2.89	0.21	0.24	0.29	0.55	2	0	0	0	7	0	0	4.8	5.2	13.55	0.63	0	0	1	0	0	2	3	15	2	0	10
187	31	31	1	1	23.59	0	0	0	0	0	1	8.06	5.36	19	195.5	0.838369	0.44	0.59	0.13	11.3	28.5	17.4	2.32	0.24	0.2	0.28	1.8	1	0	0	0	8	0	0	5.29	5.56	16.27	0.9	0	0	1	0	0	4	5	12	2	0	9
188	39	45	1	1	25.54	0	0	0	0	1	3	9.82	6.56	13	94.8	0.579345	1.13	0.68	0.24	10.9	20.2	18.9	2.31	0.24	0.24	0.28	0.25	3	0	0	0	14	0	0	4.3	4.42	14.93	2.82	0	0	0	0	0	2	2	9	1	0	9
189	30	32	1	0	19.68	0	1	0	0	0	3	5.71	4.59	17	153.1	0.967375	1.63	2.7	0.22	10.9	29.9	16.2	4.91	0.23	0.17	0.34	2.04	0	0	0	0	4	0	0	4.86	4.57	16.9	2.53	0	0	1	0	0	4	6	12	2	0	8
190	33	37	1	0	20.35	0	0	0	0	0	1	5.14	7.06	33	112.9	0.583467	0.72	5.81	0.32	10.3	23.7	17.7	2.68	0.27	0.33	0.34	0.84	2	0	0	0	15	0	0	5.31	4.7	10.42	4	0	0	0	0	0	12	12	15	2	0	11
191	32	34	1	0	19.41	1	0	0	0	0	4	11.85	7.28	19	110.9	0.76	1.32	3.45	0.34	11.5	26.8	18	2.31	0.28	0.25	0.34	0.63	2	0	0	0	7	0	0	4.29	5.11	16.66	1.47	1	1	1	0	0	8	11	9	2	0	12
192	30	45	1	0	19.98	0	0	0	0	0	4	6.24	9.48	24	195.41	0.47	0.52	4.31	0.15	10.5	23.4	16.4	3.78	0.3	0.29	0.29	1.47	0	0	0	0	9	0	0	4.96	5.47	16.57	1.55	0	1	0	0	0	6	9	12	2	0	7
193	30	32	1	0	18.52	1	0	1	0	0	6	15.59	1.77	31	195.7	0.94	0.16	3.32	0.52	12.4	30	18	2.04	0.37	0.31	0.32	0.46	0	0	0	0	7	0	0	5.37	4.91	16.19	0.98	0	1	1	0	0	8	6	12	1	0	12
194	35	34	0	0	21.98	0	0	0	0	0	2	4.45	1.36	18	97.6	0.11	0.47	4.1	0.35	10.7	23.7	16.4	3.08	0.29	0.53	0.34	0.44	2	0	0	0	28	0	0	5.35	4.76	13.53	1.99	0	0	0	0	0	12	15	3	2	0	9
195	29	29	0	0	23.39	0	0	1	0	0	2	6.55	11.87	16	128	0.670323	0.7	5.96	0.15	11.3	24.8	17.5	3.16	0.28	0.22	0.34	1.61	3	0	0	0	7	0	0	4.51	5.01	15.96	3.69	0	1	1	0	0	15	15	16	2	0	8
196	33	38	0	0	20.04	0	0	0	0	1	2	8.24	5.56	20	150.8	0.5	0.94	1.96	0.26	11	26.5	17.2	2.72	0.38	0.29	0.28	0.84	1	0	0	0	18	0	0	4.29	4.53	16.99	1.05	0	1	0	0	0	6	6	7	2	0	10
197	35	34	0	0	20.67	0	0	0	1	0	2	6.15	3.86	25	119.1	0.61	0.44	3.12	0.19	10.7	22.6	18	2.31	0.19	0.15	0.24	1.31	0	0	0	0	9	0	0	5.08	4.71	15.57	2.29	0	0	0	0	0	8	7	9	2	0	10
198	32	33	0	0	18.44	1	0	0	1	0	4	7.71	4.91	17	135.1	0.56	0.43	0.98	0.12	11.1	22.4	17.2	2.51	0.29	0.2	0.37	1.44	0	0	0	0	5	0	0	5.33	4.91	16.49	1.28	0	0	0	0	0	3	2	6	2	0	10
199	27	29	1	0	16.29	0	0	0	1	1	3	6.13	7.22	16	125	0.43	0.66	5.24	0.24	11.6	27	17	2.87	0.22	0.19	0.28	0.7	0	0	0	0	8	0	0	3.92	5.12	17.76	2.44	0	0	1	0	0	13	13	5	1	0	9
200	26	28	1	0	22.74	0	0	0	0	0	1	7.59	6.04	21	79.42	2.02	0.32	8.51	0.16	12.5	30.5	16.8	3.38	0.25	0.2	0.34	0.51	1	0	0	0	12	0	0	5.42	5.74	15.75	1.7	0	0	0	0	0	12	10	6	2	0	10
201	31	31	1	1	22.64	0	0	0	0	0	1	7.72	6.17	19	97	1.78	0.49	3.34	0.22	11.9	28.7	18	2.26	0.27	0.21	0.33	0.89	1	0	0	0	13	0	0	5.02	5.14	16.51	1.01	0	1	1	0	0	10	8	13	2	0	10.39
202	29	35	1	0	19.72	1	0	0	0	0	6	6.76	4.34	15	218.5	0.466024	0.57	1.43	0.13	12	28.8	16.3	2.46	0.24	0.18	0.45	1.73	1	0	0	0	2	0	0	3.91	4.14	13.19	2.37	0	0	1	0	0	2	4	10	2	0	8.5
203	40	42	1	0	31.36	0	0	0	1	0	8	6.38	3.6	21	129.4	0.728882	1.41	0.96	0.21	11.1	25.9	19.6	2.66	0.22	0.18	0.3	0.8	3	0	0	0	10	0	0	5.24	4.6	13.98	1.83	0	1	1	0	0	3	4	9	2	0	9
204	32	33	1	0	20.35	0	0	0	0	0	1	5.49	3.81	21	134.5	1.22	0.4	5.19	0.27	11	28.3	17	2.77	0.3	0.34	0.31	1.68	0	0	0	0	6	0	0	4.5	4.97	15.7	1.7	0	0	1	0	0	9	10	8	1	0	9
205	29	27	1	0	19.14	0	0	0	0	1	1	4.98	3.75	23	176.6	0.582919	1.02	3.85	0.17	11.8	27.6	18	1.71	0.23	0.17	0.48	0.21	3	0	0	0	3	0	0	4.97	4.89	12.81	1.5	0	0	0	0	0	9	11	4	2	0	10
206	30	33	1	0	23.38	0	0	0	0	1	8	7.14	3.84	12	172.2	0.674834	0.26	2.45	0.11	11.6	24.5	15.4	2.49	0.24	0.17	0.46	0.95	3	0	0	0	21	0	0	5.47	4.97	14.99	2.19	0	0	0	0	0	4	6	20	2	0	10
207	28	26	1	0	26.52	1	1	1	0	0	4	4.94	8.14	13	142.8	0.544684	0.99	10.12	0.21	10.6	26.1	17.9	2.32	0.23	0.57	0.34	0.89	1	0	0	0	9	0	0	5.17	5.43	16.33	1.95	0	1	2	0	0	15	15	5	2	0	10
208	28	35	1	0	22.63	1	0	0	1	1	2	6.68	3.13	47	72.68	0.874078	0.3	2.86	0.12	11.5	33.5	17.7	2.49	0.23	0.17	0.31	0.53	2	0	0	0	26	0	0	4.82	4.97	10.47	1.19	0	0	0	0	0	6	6	13	2	0	10
209	36	34	1	0	23.01	0	1	0	0	0	2	7.42	2.21	17	110.1	0.33	0.59	2.65	0.36	12.3	24.8	17.6	3.31	0.26	0.15	0.29	1.74	1	0	0	0	11	0	0	4.68	4.62	15.45	2.12	0	0	1	0	0	7	6	15	1	0	13
210	33	32	1	0	22.58	0	0	0	0	0	2	6.62	8.32	20	121.3	1.37	0.33	4.83	0.25	11.4	20.5	17.7	2.62	0.27	0.17	0.26	1.25	1	0	0	0	11	0	0	5.15	4.39	15.98	1.03	0	1	0	0	0	11	13	2	2	0	10
211	31	33	1	0	24.49	0	0	1	0	0	2	5.95	10.3	10	206	0.47	0.76	6.36	0.07	10.7	25.9	16.2	2.19	0.26	0.22	0.33	2.02	1	0	0	0	20	0	0	4.46	5.15	12.94	2.63	0	0	0	0	0	12	14	14	1	0	10
212	28	27	1	0	23.18	0	0	0	0	0	4	7.45	3.38	24	167.6	1.33	0.38	3.64	0.26	11.4	24.9	17.5	3.02	0.25	0.22	0.28	1.6	1	0	0	0	16	0	0	4.74	4.14	14.48	2.48	0	0	1	0	0	12	12	7	2	0	10
213	29	33	1	0	18.8	1	0	0	0	0	4	7.74	4.97	25	188.9	1.06	0.33	5.48	0.24	12.1	24.7	18	1.96	0.27	0.33	0.32	1.32	0	0	0	0	3	0	0	4.65	4.85	18.55	3.54	0	0	1	0	0	4	7	12	2	0	13
214	31	29	1	0	20.98	0	1	0	0	0	2	9.4	6.3	20	115.2	1.83	0.86	1.92	0.16	10.9	25.7	18.1	2.45	0.24	0.18	0.25	0.79	1	0	0	0	23	0	0	5.01	4.59	17.33	1.93	0	0	1	0	0	3	3	16	2	0	10
215	30	27	1	0	20.23	1	1	0	0	0	3	7.54	16.75	19	107	1.66	0.82	6.9	0.06	11.52	26.36	18	2.37	0.23	0.17	0.32	1.07	0	0	0	0	8	0	0	5.36	4.73	15.56	1.45	0	0	1	0	0	12	19	7	1	0	10.77
216	34	31	1	0	17.73	1	0	0	0	0	3	8.62	5.23	16	164.9	0.94	0.3	2.22	0.12	11.3	30.2	17.8	2.08	0.24	0.28	0.33	0.6	3	0	0	1	9	0	0	5.41	4.78	13.5	1.05	0	0	1	0	0	5	5	8	2	0	10
217	35	38	1	0	23.38	1	0	0	0	0	4	7.49	5.52	17	159.3	1.93	0.69	1.66	0.17	11.1	28.1	18.3	2.72	0.26	0.18	0.48	0.28	2	0	0	0	15	0	0	5.53	4.45	16.07	1.77	1	1	1	0	0	8	8	15	2	0	10.22
218	29	31	1	0	25.47	0	0	1	0	0	3	4.83	4.29	13	130.6	0.43	1.14	7.21	0.16	11.2	26.1	17.6	2.89	0.24	0.17	0.29	0.25	2	0	0	0	4	0	0	4.32	4.65	17.63	1.9	0	0	1	0	0	13	14	10	1	0	10
219	31	33	1	0	24.03	1	0	0	0	0	7	7.07	6.29	25	187.1	1.75	1.12	3.76	0.34	10.9	25.4	17.8	3.2	0.22	0.19	0.62	1.38	2	0	0	0	30	0	0	4.91	4.34	16.11	1.6	0	0	0	0	0	9	8	13	1	0	11
220	30	30	1	0	24.16	0	1	0	0	0	1	4.12	6.46	20	190.8	0.73	0.44	5.61	0.28	11.7	22.8	17.6	2.75	0.27	0.13	0.32	0.56	1	0	0	0	11	0	0	5.08	4.43	13.82	3.82	0	0	0	0	0	15	15	13	2	0	11
221	33	33	1	0	26.19	1	0	0	1	1	8	4.69	3.89	36	169.99	0.562631	0.13	8.63	0.41	10.77	21.72	17.8	3.3	0.29	0.25	0.27	0.66	0	0	1	0	17	0	0	5.18	4.45	13.52	9.39	1	1	1	0	0	14	16	5	2	1	9.93
222	31	28	1	0	24.71	0	0	0	0	1	1	7.13	3.4	12	95	0.886778	0.83	0.59	0.2	10.1	21.5	17.1	2.76	0.28	0.19	0.32	0.79	3	0	0	0	11	0	0	5.09	4.61	17.97	3.26	0	0	1	0	0	4	5	14	2	0	10
223	31	32	1	0	18.82	1	0	0	1	1	3	6.35	11.1	35	224.8	0.43	0.17	13.75	0.11	11.15	23.55	17.57	2.69	0.22	0.21	0.28	2.73	1	0	0	0	6	0	0	5.43	4.81	16.39	2.75	0	0	0	0	0	9	9	11	1	0	10.12
224	25	25	1	0	20.13	0	0	0	0	0	3	5.99	5.85	44	119.8	0.65	0.4	3.47	0.3	10.6	24.2	17.8	2.91	0.22	0.29	0.29	0.78	2	0	0	0	32	0	0	4.8	4.48	16.56	1.09	1	0	1	0	0	10	10	11	2	0	12
225	33	31	1	1	30.63	1	1	0	0	0	4	5.33	11.34	31	72.69	0.42	0.68	11.4	0.18	10.7	23.8	18.2	3.02	0.31	0.17	0.32	1.65	2	0	0	0	11	0	0	5.26	4.72	17.4	2.39	0	0	1	0	0	30	22	12	2	0	7
226	27	29	1	0	18.97	1	1	0	0	0	2	6.14	3.12	21	64.91	0.98	1.07	4.44	0.18	11.6	28.5	18.9	1.91	0.22	0.4	0.32	2	0	0	0	0	4	0	0	4.47	5.25	19.44	0.28	1	1	1	0	0	4	8	9	2	0	10
227	33	32	1	0	27.04	1	1	0	0	0	4	7.13	3.11	21	235.9	0.54	1.35	2.76	0.22	12.1	22.1	17.9	2.93	0.22	0.16	0.26	0.87	1	0	0	0	6	0	0	5.19	5.24	16.54	2.5	0	0	0	0	0	5	7	4	1	0	10
228	29	29	1	0	21.63	0	1	0	1	0	6	10.45	10.85	15	133.2	0.63294	1.63	4.13	0.07	11.1	27.5	17.5	2.34	0.23	0.19	0.31	0.49	0	0	0	0	4	0	0	4.68	4.78	14.1	1.56	0	0	0	0	0	8	8	7	2	0	10
229	26	27	1	0	19.38	1	1	1	0	0	2	7.63	6.05	22	108.4	0.54	0.18	2.26	0.21	12.4	26	18	2.68	0.25	0.23	0.27	0.58	2	0	0	0	9	0	0	4.62	5.46	17.08	2.05	0	0	0	0	0	3	10	11	2	0	12
230	30	32	1	0	20.11	1	0	0	0	0	5	7.62	7.62	23	369.4	0.7	1.12	6.37	0.25	12.3	22.5	17.6	2.84	0.28	0.17	0.32	1.32	1	0	0	0	10	0	0	5.33	4.53	17.65	1.45	0	1	1	0	0	12	10	15	1	1	1
231	31	36	1	0	26.27	0	1	0	0	0	3	6.79	4.76	19	115.7	1.16	0.63	2.48	0.22	11.1	21.8	17.9	3.02	0.25	0.19	0.27	0.8	2	0	0	0	10	1	0	6.12	4.67	15.8	1.86	0	0	0	0	0	11	14	10	1	0	10
232	30	34	1	0	21.05	1	1	0	0	0	6	9.81	6.7	35	187.4	0.75	0.87	2.19	0.17	11	22	16.5	2.22	0.24	0.27	0.27	1.15	1	0	0	0	4	0	0	4.66	4.39	13.32	2.68	0	0	1	0	0	11	6	6	2	0	9
233	34	31	1	0	25.54	0	0	0	0	0	1	5.46	2.79	18	136.8	0.55	0.38	1.81	0.23	11.5	25.3	17.5	2.45	0.21	0.18	0.35	0.25	2	0	0	0	6	0	0	4.71	4.59	19.21	2.05	0	0	1	0	0	5	4	15	2	0	7
234	33	35	1	0	24.03	1	1	0	0	0	1	5.96	3.47	11	135.3	1.58	0.4	5.82	0.23	11.16	24.53	17.68	2.78	0.25	0.19	0.27	0.82	1	0	0	0	14	0	0	4.67	4.87	11.1	4.7	1	0	1	0	0	12	12	6	2	0	9.93
235	32	29	0	0	24.76	0	0	0	0	1	2	6.32	4.31	16	161.3	0.453953	1.06	3.1	0.27	11.2	22.8	16.5	2.94	0.22	0.25	0.32	1.42	3	0	0	0	10	0	0	4.95	4.92	16.37	1.73	0	0	1	0	0	10	9	5	2	0	9
236	36	38	0	0	20.6	1	0	0	0	1	8	7.6	7.81	22	129	0.41	1.18	1.66	0.21	11.1	21.2	17.6	2.44	0.24	0.16	0.25	1	1	0	0	0	14	0	0	4.73	4.26	10.04	9.31	1	0	2	0	0	5	5	10	1	1	9.59
237	29	32	0	0	23.16	1	1	0	0	0	1	7.4	9.57	22	192	0.795965	0.16	1.11	0.25	11.4	24.2	18	2.25	0.25	0.16	0.31	0.73	2	0	0	0	8	0	0	4.34	5.51	13.6	2.05	0	0	1	0	0	7	7	14	2	0	10
238	33	33	0	0	27.33	0	0	0	0	1	3	5.36	4.65	17	168.5	1.58	0.55	4.7	0.35	10.8	27.1	16.9	2.93	0.26	0.41	0.36	1.66	3	0	0	0	18	0	0	5.25	4.79	16.22	0.94	0	0	0	0	0	13	8	9	1	0	10
239	41	46	0	1	22.73	1	1	0	0	1	6	8.57	10.76	27	131.2	0.8	0.22	2.46	0.22	11.2	26	17.6	3.1	0.61	0.23	0.28	1.66	0	0	0	0	10	0	0	5.05	5.07	18.89	1.22	0	0	2	0	0	7	6	8	2	0	10
240	30	30	0	0	22.61	0	0	0	1	0	2	5.4	2.83	30	140.9	0.28	0.2	1.05	0.17	10.9	23.9	17.7	2.91	0.27	0.16	0.31	1.22	0	0	0	0	13	0	0	5.4	4.28	15.04	2.08	0	0	0	0	0	6	6	13	2	0	12
241	31	34	1	0	22.19	1	0	0	1	0	6	7.45	4.84	12	327.5	0.18	0.97	0.91	0.26	10.9	21.9	17.2	2.76	0.21	0.17	0.39	0.75	0	0	0	0	26	0	0	5.53	4.56	14.6	1.44	0	1	0	0	0	8	8	6	2	0	11
242	27	32	1	0	24.61	1	0	0	0	0	3	5.95	5.96	32	148.6	0.7	1.27	1.74	0.1	11.2	27.9	16.7	2.96	0.23	0.17	0.34	1.84	1	0	0	0	13	0	0	5.03	4.93	17.65	1.62	0	0	1	0	0	6	6	8	2	0	11
243	39	33	1	0	21.24	0	1	1	0	1	2	11.03	4.72	12	104.6	0.48	1.33	0.81	0.21	11.7	28.1	17.6	2.76	0.23	0.19	0.26	1.36	1	0	0	0	11	0	0	5.58	4.69	15.04	3.26	1	1	1	0	0	5	4	14	2	0	10
244	31	32	1	0	19.64	1	1	0	0	0	3	7.52	7.22	17	173	0.67	0.99	1.95	0.21	11.7	27.7	19.2	2.13	0.26	0.18	0.27	1.55	0	0	0	0	17	0	0	4.39	4.26	15.5	1.21	0	0	1	0	0	7	7	8	2	0	11
245	31	30	1	1	21.63	0	1	1	0	1	3	6.18	4.58	26	144.5	0.388713	1.25	2.47	0.23	12	27.8	17.2	2.68	0.21	0.17	0.26	0.9	1	0	0	0	13	0	0	4.6	4.74	15.64	1.39	0	0	1	0	0	5	4	15	2	0	12
246	28	32	1	0	28.19	1	0	0	1	0	3	7.67	3.02	17	112.2	0.91	0.38	2.42	0.36	11.1	26.4	16.7	3.52	0.22	0.15	0.24	0.81	1	0	0	0	30	0	0	4.36	4.41	16.43	1.8	0	0	0	0	0	9	6	8	1	0	10
247	39	30	1	0	18.65	0	0	0	0	1	1	11.04	5.58	16	333.9	0.37	0.15	1.56	0.14	10.6	22.4	18.8	1.87	0.46	0.26	0.34	0.61	0	0	0	0	7	0	0	5.57	5.66	16.09	3.8	0	1	1	0	0	4	4	13	2	0	11
248	29	28	1	0	22.19	1	1	1	0	0	3	6.56	10.38	15	107.2	0.2	2.56	9.06	0.14	11.1	27	18.2	2.62	0.28	0.33	0.29	0.89	1	0	0	0	5	0	0	4.79	4.02	12.74	1.85	0	0	2	0	0	13	13	12	2	0	12
249	32	31	1	0	20.6	0	1	1	0	0	1	7.84	2.8	15	138.5	0.773819	0.44	2.04	0.2	11.3	25.4	18	2.37	0.27	0.14	0.29	0.52	2	0	0	0	5	0	0	4.92	4.51	18.3	0.93	1	1	1	0	0	7	4	10	2	0	11
250	29	25	1	0	18.06	0	1	0	1	1	1	6.72	5.64	62	196.9	0.48	4.25	1.21	0.18	11.4	33.8	17.5	1.95	0.28	0.26	0.34	1.1	2	0	0	0	18	0	0	5.23	4.71	15.09	2.82	0	0	1	0	0	5	5	4	2	0	10
251	37	37	0	0	26.19	0	0	0	0	0	9	2.72	2.46	9	160.9	0.565562	0.88	1.81	0.21	10.5	22.7	18.8	2.32	0.21	0.16	0.36	0.75	1	0	0	0	8	0	0	4.89	4.78	14.95	1.24	0	0	0	0	0	2	4	12	1	1	12
252	35	37	0	0	18.44	1	0	0	0	0	3	6.61	5.69	29	93.1	0.69	1.09	3.24	0.27	11.6	24	17.4	2.62	0.39	0.18	0.27	2.71	0	0	0	0	30	0	0	4.22	4.93	15.68	2.8	0	0	0	0	0	6	5	8	2	0	11
253	29	28	0	0	24.59	1	0	0	0	0	3	6.2	6.37	26	878.5	0.85	0.12	1.79	0.33	11.9	34.9	19.3	3.03	0.25	0.18	0.47	0.7	1	0	0	0	20	0	0	4.36	4.83	14.6	1.88	0	0	0	0	0	5	4	4	2	0	11
254	34	38	0	0	22.09	0	1	0	0	0	1	5.88	2.27	9	161.4	0.71	0.7	1.59	0.3	11.2	21.9	18	2.5	0.2	0.13	0.35	1.15	0	0	0	0	9	0	0	4.73	4.62	15.15	0.8	0	0	1	0	0	8	8	12	1	0	6.5
255	38	39	0	1	16.33	0	0	0	1	0	1	12.41	8.48	19	113.3	0.86	0.73	1.43	0.35	10.9	28.5	17.8	2.03	0.28	0.81	0.61	0.93	2	0	0	0	9	0	0	4.59	4.71	14.11	1.38	0	0	1	0	0	3	2	6	2	0	11
256	31	31	0	0	29.32	1	0	0	0	0	4	6.13	5.05	13	210.01	0.785469	0.25	3.5	0.21	11	27.6	18.4	2.45	0.2	0.14	0.31	1.53	2	0	0	0	6	0	0	4.27	5.77	11.89	1.2	0	0	1	0	0	18	18	5	2	0	13
257	36	39	0	0	24.8	0	0	0	0	0	9	7.41	6.15	18	128.12	0.334652	0.45	2.75	0.22	11.4	23.6	16.6	3.28	0.21	0.17	0.27	1.95	3	0	0	0	9	0	0	4.74	4.49	13.19	4.14	0	0	0	0	0	5	8	9	2	0	9
258	28	29	0	0	22.81	1	1	1	0	0	1	7.61	1.99	17	98.4	0.27	0.66	0.75	0.32	14.3	36.9	21	2.62	0.29	0.26	0.32	1.61	0	0	0	0	9	0	0	4.76	4.51	16.54	1.3	1	1	1	0	0	4	2	16	2	0	9
259	33	39	1	0	19.48	1	1	0	0	1	2	5.81	4.22	19	100.3	0.87	0.7	6.3	0.21	11.43	25.42	18.12	2.64	0.26	0.2	0.29	1.12	0	0	0	0	24	0	0	5.09	5.34	16.74	1.42	0	0	3	0	0	14	14	8	1	0	10.37
260	32	33	1	0	19.68	1	0	0	1	0	5	9.62	9.31	16	156.9	0.743611	0.13	1.56	0.17	11.2	22.1	17	2.44	0.25	0.22	0.32	0.88	0	0	0	0	7	0	0	4.52	5.18	16.29	1.19	0	0	1	0	0	7	7	2	2	0	10
261	31	30	1	0	23.43	1	0	1	0	0	4	6.59	2.41	20	278.9	0.17	0.36	0.92	0.3	11.2	27.1	16.9	3.56	0.21	0.16	0.25	0.79	1	0	1	0	20	0	0	4.3	4.1	13.27	1.82	0	0	1	0	0	3	3	4	2	0	11
262	37	38	1	0	17.17	0	0	0	0	0	5	23.11	6.76	26	167.5	1.72	0.34	0.94	0.18	11	25.2	17	2.76	0.23	0.27	0.75	0.86	1	0	0	0	6	0	0	5	4.69	15.38	0.71	0	0	0	0	0	4	3	8	2	0	10
263	35	32	1	0	27.7	0	0	0	0	1	2	8.26	5.71	10	203	0.920901	0.81	2.74	0.38	11.5	28.7	18.3	2.16	0.22	0.16	0.28	1.37	2	0	0	0	9	0	0	4.33	4.37	15.08	2.01	0	0	1	0	0	9	11	4	2	0	10
264	24	29	1	0	21.45	1	0	1	0	0	3	5.02	8.93	21	121.1	0.18	1.39	4.79	0.08	11.2	29.1	18	2.12	0.23	0.2	0.28	0.58	2	0	0	0	10	0	0	4.55	5.13	18.14	1.95	0	0	2	0	0	17	20	7	2	0	9
265	40	31	1	0	21.82	0	0	0	1	0	2	6.8	3.62	20	149.4	1.74	0.77	1.27	0.19	10	21.1	17.9	2.11	0.24	0.18	0.28	1.07	1	0	0	0	14	0	0	5.57	4.46	13.02	2.43	0	0	0	0	0	2	6	7	2	0	10
266	36	39	1	0	25.54	0	0	0	0	0	2	9.22	4.5	15	122.3	1.59	2.21	0.69	0.25	12	23.2	17.3	3.04	0.24	0.19	0.26	0.51	1	0	0	0	9	0	0	4.06	5.58	15.57	0.8	0	0	1	0	0	3	4	3	2	0	10
267	40	37	1	0	23.27	0	1	0	0	0	2	13.09	4.91	25	104.5	0.77	0.98	3.79	0.06	10.7	32	17.4	2.28	0.21	0.16	1.65	0.45	3	0	0	0	11	0	0	5.51	4.29	17.97	4.1	0	0	0	0	0	6	5	10	2	0	10
268	37	35	1	0	20.98	1	1	0	0	0	1	8.4	5.9	33	129	1.24	0.23	1.25	0.12	10.3	21.2	17.5	2.22	0.25	0.21	0.3	1.06	3	0	0	0	9	0	0	5.51	4.9	15.02	5.78	0	1	1	0	0	2	1	12	2	0	1
269	33	32	1	1	24.17	0	0	0	1	1	2	8.67	4.44	10	139.6	1.05	0.73	1.92	0.16	11.1	21.8	17.9	2.58	0.27	0.17	0.28	0.74	3	0	0	0	7	0	0	5.5	4.86	15.39	1.61	0	0	1	0	0	5	5	15	2	0	10
270	36	37	1	0	23.29	1	0	0	1	0	3	6.61	5	18	64.58	0.605373	0.69	2.27	0.25	11	23.2	18	2.36	0.22	0.17	0.26	0.25	1	0	0	0	7	0	0	4.69	4.61	15.39	2.69	0	0	0	0	0	6	4	11	1	0	10
271	39	43	0	0	19.51	0	0	1	0	0	3	9.08	6.23	14	743.3	0.73	0.63	0.3	0.18	12.3	29.9	18.1	1.97	0.23	0.16	0.28	1	0	0	0	0	6	0	0	4.71	4.18	13.68	2.8	0	0	1	0	0	1	3	3	2	0	8
272	32	32	0	0	23.74	0	1	1	1	0	2	6.52	8.42	60	196.7	0.86	1.65	8.99	0.1	10.9	22.5	17.2	3.31	0.23	0.2	0.41	0.68	3	0	0	0	8	0	0	5.65	4.34	17.14	1.57	0	0	1	0	0	12	12	12	1	0	13
273	31	29	0	0	23.46	1	1	0	1	0	5	8.81	10.67	22	69.05	1	0.56	2.4	0.14	11.1	27.7	17.6	2.13	0.23	0.22	0.3	0.74	0	0	0	0	5	0	0	4.6	5.44	15.26	1.69	0	0	1	0	0	6	4	8	1	0	12
274	30	31	0	0	29.54	1	0	1	0	0	3	3.67	3.21	10	123.6	0.582578	0.9	3.94	0.35	11.6	31.8	18.9	3.47	0.24	0.22	0.34	1.69	2	0	0	0	18	0	0	4.51	4.51	13.9	2.72	0	0	0	0	0	14	16	11	2	0	13
275	30	30	0	0	21.91	1	0	1	0	0	2	6.09	14.33	29	161.8	1.03231	0.33	9.84	0.07	11.6	28.1	18.3	1.93	0.23	0.27	0.29	1.86	2	0	0	0	5	0	0	4.87	5.21	15.34	1.34	0	0	1	0	0	14	10	13	1	0	11
276	27	28	0	0	23.58	1	0	0	0	1	5	5.47	5.2	16	467.1	1.04648	0.46	6.1	0.34	11.6	24.2	17.7	2.72	0.25	0.2	0.3	1.22	1	0	0	0	10	0	0	4.43	4.89	9.22	7.41	1	1	0	0	0	14	15	8	1	0	10
277	33	31	0	0	19.35	0	1	0	0	0	2	5.49	6.39	22	86.29	0.4	0.54	3.14	0.24	12	26.5	15.6	2.62	0.23	0.15	0.27	1.12	1	0	0	0	11	0	0	4.47	4.52	13.92	1.54	0	0	1	0	0	12	10	2	1	0	10.5
278	34	33	0	0	25.23	1	0	1	0	0	10	6.74	14.49	7	141.1	0.82	1.22	5.02	0.21	10.9	26.1	17.9	2.94	0.23	0.19	0.51	0.55	1	0	0	0	20	0	0	5.67	4.8	17.8	0.95	1	1	1	0	0	17	15	3	2	0	13
279	35	36	0	0	23.59	1	1	0	0	0	4	7.43	4.63	14	239.4	0.77	1.67	4.22	0.32	11.1	25.9	19.1	2.37	0.43	0.26	0.34	1.33	2	0	0	0	25	0	0	5.04	5.48	13.12	1.89	0	0	1	0	0	7	4	12	2	0	11
280	32	33	0	0	18.44	1	0	0	1	0	7	3.88	1.94	31	689.8	0.24	0.31	2.74	0.3	11.5	24.4	18.4	2.19	0.25	0.21	0.25	1.39	2	0	0	0	20	0	0	4.96	4.58	15.91	1.1	0	0	0	0	0	6	8	10	1	0	13
281	27	30	1	0	32.38	0	0	0	0	0	2	6.8	2.09	7	102.6	1.02	0.13	5.49	0.29	11.6	26	18	2.6	0.23	0.15	0.28	0.91	1	0	0	0	25	0	0	4.92	5.33	14.53	0.74	1	1	0	0	0	12	10	5	2	0	7.5
282	24	26	1	0	32.96	1	0	0	0	0	3	5.52	11.43	13	139.4	0.67	1.04	3.71	0.18	11	24.6	19.5	2.83	0.27	0.16	0.27	0.7	3	1	0	0	8	0	0	4.88	5.43	17.31	1.4	0	0	0	0	0	12	13	5	2	0	8
283	30	29	1	0	30.63	1	0	0	0	0	4	8.04	5.58	8	116.3	1.02	0.4	6.61	0.1	10.9	25.7	18	2.57	0.24	0.31	0.31	0.84	0	0	0	0	6	0	0	5.81	4.78	16.15	2.3	0	1	1	0	0	6	6	12	2	0	10.5
284	33	31	1	0	20.7	1	0	0	1	0	3	6.77	4.85	23	150.6	0.41	0.35	3.36	0.33	12.3	30.6	18.8	1.78	0.22	0.14	0.57	1.32	0	0	0	0	3	0	0	4.89	4.57	16.39	2.63	0	1	1	0	0	7	7	11	1	1	14
285	32	37	1	0	29.45	1	0	0	0	0	1	5.34	6.29	15	121.8	1.11	0.99	6.35	0.21	10.8	25.5	17.1	3.16	0.22	0.17	0.27	0.72	1	0	0	0	18	0	0	4.75	4.35	18.93	1.48	0	0	1	0	0	14	14	14	1	1	10.29
286	37	32	1	0	28.91	1	1	0	0	1	3	10.27	6.84	22	128.5	0.25	0.24	0.8	0.55	10.6	23.6	16.9	3.43	0.23	0.14	0.27	0.28	0	0	0	0	20	0	0	5.35	4.6	17.29	1.48	0	0	1	0	0	4	5	5	2	0	10
287	29	33	1	0	26.86	0	0	0	0	0	2	10.52	3.53	17	93.8	0.18	1.05	3.84	0.18	11.3	27	17.8	2.45	0.23	0.22	0.26	1.07	0	0	0	0	3	0	0	5.1	4.49	15.76	2.32	0	0	1	0	0	7	7	11	2	0	13.5
288	38	41	1	0	21.78	1	0	0	1	0	2	6.11	2.16	7	114	0.47	0.47	1.99	0.2	10	23.5	17.9	2.62	0.22	0.16	0.25	0.94	1	0	0	0	8	0	0	4.09	5.01	21.19	0.32	0	0	1	0	0	1	8	11	2	0	9.5
289	31	33	1	0	22.47	1	0	0	0	0	2	6.18	10.95	28	192.1	1.06	0.14	5.68	0.14	11.31	25.31	18.01	2.76	0.24	0.15	0.27	0.25	0	0	0	0	15	0	0	4.94	4.99	14.82	3.44	0	0	1	0	0	12	12	3	2	0	10.36
290	31	36	0	1	27.76	0	0	1	1	1	3	5.95	2.01	26	123.5	1.19636	1.08	2.07	0.33	10.9	26.1	17.8	2.54	0.23	0.28	0.29	1.14	0	0	0	0	11	0	0	5.14	4.59	17.19	1.64	0	0	0	0	0	7	8	10	1	0	9
291	31	34	0	0	23.74	1	0	0	0	0	7	7.22	6.32	47	163.2	0.521982	0.65	7.3	0.16	11.1	20.9	17.1	3.41	0.22	0.23	0.26	0.37	1	0	0	0	16	0	0	5.17	4.36	19.46	2.21	0	0	1	0	0	8	13	6	2	0	9.5
292	31	31	0	1	21.37	0	0	1	0	1	1	4.91	4.95	25	197.5	0.63	0.96	4.72	0.19	11.2	26.9	17.3	2.6	0.24	0.24	0.29	0.65	1	0	0	0	11	0	0	5.22	3.5	15.39	2.17	1	1	1	0	0	6	6	7	1	0	10
293	33	44	0	0	24.94	1	0	0	0	0	1.5	8.45	5.69	28	728.8	0.768548	0.26	1.84	0.11	11.3	28.4	18.2	2.38	0.23	0.16	0.28	0.51	1	0	0	0	8	0	0	5.46	5.01	12.69	0.96	0	0	1	0	0	6	7	5	2	0	10
294	28	33	0	0	30.23	0	0	0	0	0	1	8.23	3.51	10	118.8	1.35	1.16	0.64	0.22	10.8	21.9	17.5	2.38	0.23	0.24	0.28	1.26	3	0	0	0	10	0	0	5.1	4.74	15.44	0.99	0	0	0	0	0	7	6	9	2	0	12
295	31	40	0	0	24.49	1	0	0	0	1	4	6.99	4.22	19	146.2	0.83	1.03	3.22	0.21	10.7	30.2	18.5	2.59	0.24	0.36	0.28	1.99	1	0	0	0	8	0	0	5.53	5.05	17.72	2.63	1	0	0	0	0	7	8	10	1	0	14
296	26	26	0	0	29.89	1	0	1	0	0	2	4.62	15.37	10	131.3	0.26	0.47	10.74	0.22	10.4	21.8	17.3	3.71	0.22	0.13	0.3	0.57	1	0	0	0	27	0	0	5.02	5.39	12.65	2.62	0	0	1	0	0	16	15	10	1	0	8.5
297	30	30	1	0	25.15	1	0	0	0	0	6	5.67	4.13	6	713.8	0.74	0.17	3.2	0.15	10.7	28.3	17.5	3.13	0.22	0.15	0.3	1.41	3	0	0	0	31	0	0	5.5	4.71	14.95	1.33	0	0	1	0	0	13	13	11	1	0	11
298	33	32	1	0	22.19	1	0	0	0	0	2	5.76	2.7	4	106.3	0.779219	0.81	2.15	0.31	11.1	25.7	18.4	2.76	0.27	0.21	0.3	1.06	1	0	0	0	19	0	0	4.9	2.61	6.3	8.59	1	1	0	0	0	5	4	5	2	0	11
299	34	32	1	0	26.96	1	0	0	0	0	7	7.2	12.88	36	98.11	1.09	0.92	8.04	0.27	11.1	26.3	18.5	2.73	0.23	0.16	0.26	2.62	0	0	0	0	8	0	0	5.9	5.1	16.54	1.82	0	0	1	0	0	30	25	6	1	0	10
300	31	29	1	0	27.04	0	0	0	0	0	1	7.62	4.73	45	514.9	0.43	0.8	3.9	0.33	11.4	24.8	18.5	2.85	0.22	0.19	0.26	0.77	3	0	0	0	16	0	0	5.18	4.49	14.24	1.19	0	0	1	0	0	13	9	7	1	0	10
301	32	32	1	0	24.24	1	0	0	0	0	6	7.83	19.53	22	266.7	0.45	0.44	3.98	0.16	10.7	20.2	16.3	3.63	0.24	0.15	0.26	1.25	1	0	0	0	8	0	0	5.66	4.47	14.24	2.1	0	0	1	0	0	7	8	6	2	0	10.14
302	35	35	1	0	22.22	0	0	0	1	0	3	6.32	5.1	21	90.3	0.38	0.51	2.56	0.14	11.5	28.7	17.6	2.43	0.22	0.15	0.28	1.73	2	0	0	0	5	0	0	5.25	4.68	18.89	1.71	0	0	1	0	0	6	6	4	2	0	8.5
303	36	33	1	0	27.04	1	0	0	0	1	7	11.57	5.73	12	88.7	0.25	1.17	2.92	0.49	11.4	34.8	17.9	3.14	0.24	0.48	0.24	1.5	0	0	0	0	13	0	0	5.07	5.63	18.77	1.04	0	0	1	0	0	7	7	16	1	0	10.5
304	30	33	1	0	25.54	1	0	0	0	0	5	4.36	2.91	23	195.9	0.88	1.61	1.73	0.32	10.3	21.5	18.3	2.94	0.24	0.3	0.53	0.95	1	0	0	0	21	0	1	5.55	4.33	16.67	1.92	0	0	0	0	0	4	3	12	2	0	9.5
305	40	37	1	0	27.7	0	0	0	0	0	5	5.87	4.58	16	145.9	1	1.12	2	0.17	11	27.9	20.2	2.5	0.22	0.15	0.28	0.81	1	0	0	0	7	0	0	5.21	4.56	16.69	0.88	0	0	2	0	0	3	3	5	2	0	8.5
306	31	31	1	0	24.18	0	0	0	0	0	2	5.4	2.63	32	102.8	0.508138	0.79	2.31	0.2	10.8	29.4	17.9	2.97	0.23	0.2	0.52	1.01	1	0	0	0	14	0	0	5.38	4.99	14.65	1.87	0	0	0	0	0	7	7	3	1	0	10
307	39	29	1	0	20.07	0	0	0	1	1	4	18.35	2.75	16	158.4	1.35	0.67	1.71	0.28	10.7	20.6	18.2	3.05	0.22	0.18	0.39	0.96	1	0	0	0	9	0	0	5.87	4.91	14.32	1.41	0	0	1	0	0	6	5	7	1	0	11
308	32	47	1	0	21.63	1	0	0	0	0	3	7.67	4.77	14	208.1	0.68	1.33	6.11	0.17	11.4	30.8	19.6	3.02	0.24	0.19	0.27	0.5	2	0	0	0	14	0	0	4.82	4.45	16.48	0.74	0	0	0	0	0	9	7	12	2	0	10
309	28	26	0	0	21.46	0	0	0	0	1	3	11.88	5.41	26	140.8	0.7	0.43	4.26	0.29	11.2	24.9	17.8	2.68	0.34	0.17	0.32	1.86	0	0	0	0	10	0	0	5.22	4.5	18	1.66	0	0	0	0	0	12	13	15	2	0	13.5
310	26	24	1	0	26.32	0	0	0	0	0	1	7.03	2.63	18	242.5	0.65	1.5	2.84	0.25	10.9	27.1	17.1	3.08	0.23	0.2	0.28	0.82	2	0	0	0	11	0	0	4.42	4.92	14.86	1.48	0	0	0	0	0	6	8	4	1	0	9.5
311	37	41	1	0	20.35	1	0	0	0	0	8	17.96	1.03	21	155.4	0.83	3.3	0.97	0.14	12.2	22.5	17.7	2.34	0.29	0.16	0.27	2.24	1	0	0	0	17	0	0	5.18	5.68	15.92	0.94	0	0	1	0	0	4	3	13	2	0	8.5
312	39	38	1	0	24.5	0	0	0	0	0	1	6.59	2.77	15	118.4	0.840048	1.11	3.19	0.19	10.7	29.3	18.1	2.99	0.24	0.25	0.51	0.7	1	0	0	0	21	0	0	5.28	4.51	17.14	1.36	0	0	1	0	0	3	2	16	2	0	14
313	27	30	1	0	21.62	1	0	0	1	1	2	3.44	2.07	30	218.8	0.2	0.46	1.23	0.12	10.4	26.9	17.6	2.28	0.28	0.15	0.31	1.02	1	0	0	0	6	0	0	4.65	4.84	16.91	1.81	0	1	0	0	0	7	7	11	2	0	11
314	32	37	1	0	24.37	0	0	0	1	1	5	5.85	2.69	12	112	0.52529	0.43	5.48	0.28	12.6	28.3	18.2	2.58	0.29	0.14	0.34	0.77	1	0	0	0	26	0	0	4.2	4.81	18.88	1.88	0	0	1	0	0	13	12	9	2	0	11
315	28	31	1	0	21.82	1	0	0	1	1	3	6.04	3.89	16	152	0.803667	0.35	2.1	0.32	10.9	25	19.2	1.8	0.23	0.28	0.25	1.34	0	0	0	0	5	0	0	4.68	4.31	15.46	1.4	0	0	1	0	0	7	8	7	1	0	11
316	33	30	1	0	22.73	1	0	0	0	0	2	6.09	4.48	11	126.5	0.41	0.45	4.32	0.38	10.7	24.4	16.9	3.2	0.24	0.27	0.39	1.15	0	0	0	0	30	0	0	4.86	4.11	11.69	1.57	0	0	1	0	0	10	11	3	1	0	12
317	39	24	1	0	24.95	0	0	0	0	0	1	6.51	5.83	19	97.9	1.07	0.63	2.28	0.26	10.6	24.9	18.1	3.64	0.26	0.15	0.29	1.06	2	0	0	0	24	0	0	5.53	4.9	16.71	1.33	0	0	0	0	0	8	5	12	2	0	9
318	28	29	1	0	19.41	1	0	0	0	0	5	4.75	18.57	27	199.9	1.41	0.37	6.92	0.07	11.9	30	18.7	2.13	0.25	0.16	0.3	0.81	3	0	0	0	7	0	0	4.87	5.03	13.14	2.91	0	0	0	0	0	14	15	6	2	0	11.01
319	26	26	1	0	19.72	0	0	0	1	0	4	7.36	6.26	36	131.2	0.61	0.83	3.58	0.13	13.8	37.3	18.6	1.9	0.23	0.15	0.27	0.94	0	0	0	0	5	0	0	5	5.23	15.96	2.24	0	0	1	0	0	4	5	13	1	1	10
320	34	29	1	0	22.18	0	0	0	0	0	4	6.65	10.8	20	150.1	0.37	0.78	2.81	0.1	10.5	24.9	17.4	2.54	0.35	0.17	0.27	0.23	1	0	0	0	8	0	0	5.26	5.31	15.38	3.29	1	0	1	0	0	4	7	15	1	0	10
321	26	27	1	0	26.16	1	0	0	0	0	2	6.13	5.16	16	183.4	0.716761	1.39	3.85	0.26	10.6	22.6	19.3	2.97	0.23	0.14	0.29	0.94	2	0	0	0	6	0	0	4.5	5.09	15.47	1.58	0	0	1	0	0	9	7	7	1	1	14
322	26	26	1	0	22.73	1	0	0	0	0	2	4.37	5	22	136.8	0.73	0.32	3.05	0.2	11.4	23.7	17	3.31	0.22	0.16	1.13	1.27	3	0	1	0	22	0	0	4.9	4.49	15.49	1.99	0	0	1	0	0	11	11	9	2	0	11
323	34	35	1	0	29.56	1	0	0	0	0	4	8.55	4.5	19	162.4	0.670716	0.6	2	0.19	11.2	24.1	17.1	4.11	0.22	0.16	0.25	1.19	3	0	0	0	21	0	0	5.64	5.17	14.69	1.56	1	1	1	0	0	4	6	10	2	0	11
324	30	32	1	0	18.98	1	0	0	0	0	2	10.1	11.11	25	147	0.37	0.22	2.83	0.19	12.3	31.9	17.9	2.14	0.26	0.23	0.26	1.51	1	1	0	0	18	0	0	4.29	4.55	18.36	1.02	1	0	0	0	0	3	4	11	2	0	8
325	36	36	1	0	22.19	0	0	0	0	0	3	6.76	8.69	17	626.6	0.35	1.11	1.72	0.16	11.8	26.1	18.5	2.13	0.24	0.21	0.32	1.43	0	0	0	0	5	0	0	5.08	4.49	13.02	3.14	0	0	0	0	0	5	7	7	2	0	8
326	33	34	1	0	34.33	1	0	1	0	1	3	8.93	5.3	16	115.7	0.39	0.45	0.7	0.31	11.2	28.8	18.6	2.84	0.24	0.29	0.32	1.15	1	0	0	0	25	0	0	5.31	5.17	15.97	2.86	0	0	1	0	0	5	6	7	1	0	10
327	34	34	1	0	20.6	1	0	0	1	1	2	4.85	2.69	15	795.6	0.27	0.9	2.68	0.15	10.8	24.7	17.7	2.6	0.22	0.21	0.3	0.83	1	0	0	0	8	0	0	5.58	4.4	14.68	1.3	0	0	0	0	0	5	5	9	1	1	8
328	34	35	0	0	21.98	1	0	0	0	0	6	5.06	2.92	29	145.6	0.45	0.9	1.6	0.23	11	24.2	17.7	3.07	0.24	0.14	0.32	1.46	2	0	0	0	15	0	0	5.01	4.1	13	2.39	0	1	1	0	0	2	3	6	1	0	10
329	25	25	0	1	29.73	0	0	0	0	1	3	6.62	7.05	1	144.3	0.560409	1.12	5.51	0.27	11.1	25.8	17.6	3.13	0.22	0.15	0.26	2.46	0	0	0	0	11	0	0	4.6	4.68	17.97	1.25	1	0	1	0	0	13	13	12	2	0	12
330	30	31	0	0	20.91	1	0	0	0	0	2	5.1	5.77	20	82.29	1.3	1.73	7.94	0.22	11.6	25.8	17.1	3.3	0.26	0.33	0.28	0.86	0	0	0	0	4	0	0	4.94	4.82	20.2	2.58	0	0	0	0	0	12	12	11	2	0	13
331	36	37	0	0	20.43	0	0	0	0	0	10	8.74	4.37	13	73.5	0.9	0.32	2.09	0.12	11.4	27.6	18.2	2.25	0.2	0.21	2.61	0.26	1	0	0	0	9	0	0	5.13	5.09	17.95	1.6	0	1	1	0	0	5	8	11	1	0	10
332	24	22	0	0	20.98	0	0	0	0	0	1	6.43	5.51	20	226.1	1.79	0.65	4.54	0.17	12.5	30.9	18.3	2.09	0.3	0.24	0.26	0.26	1	0	0	0	5	0	0	5.45	5.43	15.65	0.98	1	0	1	0	0	17	16	10	1	0	9
333	26	29	0	0	22.03	1	0	0	0	0	3	8.12	4.79	29	168.4	0.58	0.33	2.46	0.24	11.6	25.4	17.8	2.33	0.23	0.27	0.4	1.37	2	0	0	0	8	0	0	5.3	5.04	17.56	1.13	0	0	1	0	0	6	7	9	1	0	10.5
334	32	34	0	0	20.29	1	0	0	1	1	3	8.63	9.08	18	392	1.29124	1.03	1.14	0.17	10.9	25.1	18	2.32	0.22	0.14	0.34	0.84	0	0	0	0	18	0	0	4.22	4.66	17.66	0.77	0	0	0	0	0	3	4	16	2	0	10
335	37	34	0	0	28.14	0	0	0	1	0	5	7.75	20.77	16	217.3	0.32	0.26	1.29	0.23	11.2	29.1	17.9	3.18	0.26	0.19	0.26	0.84	0	0	0	0	27	0	0	4.89	4.58	16.96	2.99	0	0	1	0	0	7	6	13	1	0	11
336	30	30	0	0	18.74	1	0	1	1	1	2	6.45	4.32	24	119	0.644207	2.09	3.38	0.18	12	27.9	18.3	2.17	0.23	0.14	0.28	0.47	0	0	0	0	5	0	0	4.4	5.1	18.44	1.59	0	0	0	0	0	6	7	12	2	0	10
337	24	24	0	0	20.6	1	0	0	0	0	3	11.89	21.51	15	191.6	1.21	0.11	3.06	0.07	11.1	30.1	18.1	1.84	0.43	0.21	0.3	0.35	3	0	0	0	7	0	0	5.29	5.12	14.49	3.28	0	0	1	0	0	5	8	5	2	0	10.5
338	36	36	0	0	20.96	1	0	0	0	0	2	7.53	6.15	19	184	0.585251	0.46	3.74	0.44	11.6	29.9	18.5	2.82	0.26	0.63	0.26	1.79	2	0	0	0	17	0	0	5.33	4.01	12.17	3.59	0	0	1	0	0	4	7	14	2	0	12.5
339	30	32	0	0	22.63	0	0	0	0	0	1	5.47	4.7	10	158.8	0.63	0.66	3.35	0.36	11.6	23.7	19	2.12	0.23	0.18	0.29	0.52	1	0	0	0	38	0	0	4.05	4.89	14.63	1.9	0	0	2	0	0	8	8	17	2	0	9
340	37	37	0	0	20.7	0	0	0	0	0	2	7.05	4.65	20	187.96	0.7	0.93	5.77	0.25	10.8	24.1	18.5	2.43	0.27	0.19	0.34	1.06	1	0	0	0	20	0	0	4.41	4.29	17.66	1.86	0	0	1	0	0	4	5	3	1	0	10
341	31	30	0	0	21.63	1	0	0	0	0	3	10.35	5.41	28	168.9	1.22	0.51	3.57	0.17	11.5	27.7	16.9	3.22	0.27	0.21	0.38	1.51	1	0	1	0	20	0	0	5.22	4.75	17.43	1.38	0	1	0	0	0	10	10	11	2	0	10.71
342	34	33	0	0	25.93	1	0	0	0	0	3.5	9.22	12.44	20	104	1.29	0.71	2.77	0.14	10.2	26.9	18	3.11	0.23	0.22	0.26	0.97	2	0	0	0	18	0	0	5.39	4.92	15.64	2.13	0	0	0	0	0	5	5	2	2	0	13
343	29	27	0	1	23.38	0	0	1	0	0	1	5.92	9.06	18	214.3	1.17342	0.41	6.42	0.15	11	28.8	17.8	2.46	0.23	0.17	0.28	1.18	1	0	0	0	22	0	0	4.93	4.3	17.12	1.69	0	0	1	0	0	15	13	14	1	0	11
344	30	30	0	0	25.19	1	0	0	0	0	5	7.07	15.9	61	861.9	0.48	0.67	9.11	0.11	10.1	22.4	18.5	2.39	0.22	0.21	0.29	0.34	0	0	0	0	4	0	0	5.02	5.18	17.23	1.52	0	0	2	0	0	16	15	10	1	0	11
345	31	32	0	0	17.63	1	0	0	0	1	7	8.88	3.81	12	962.1	0.41	0.23	3.3	0.14	11.1	23.2	18.5	1.96	0.21	0.46	0.25	0.42	1	0	0	0	4	0	0	4.32	4.32	13.82	2.04	0	1	1	0	0	8	5	17	2	0	9.5
346	38	39	0	0	31.37	0	0	0	0	0	4	6.44	2.58	24	163.7	0.38	0.56	1.6	0.23	10.3	22.2	19.6	3.07	0.23	0.17	0.27	2.12	1	0	0	0	10	0	0	5.95	9.59	20.94	1.36	0	0	0	0	0	5	6	12	1	0	8
347	34	32	0	0	19.67	1	0	0	0	0	5	6.1	8.89	10	116.4	0.3	1.87	1.73	0.11	11.2	27.3	18.4	1.9	0.21	0.14	0.28	1.29	0	0	0	0	3	0	0	4.18	4.12	12.57	0.97	0	0	1	0	0	5	6	3	2	0	12.5
348	35	37	0	0	20.85	1	0	0	1	0	6	10.03	6.81	25	134.3	0.75	1.46	2.81	0.17	10.3	24.2	17.7	2.35	0.23	0.18	0.38	1.99	0	0	0	0	8	0	0	4.64	4.67	17.6	4.59	1	1	0	0	0	5	6	8	2	0	12
349	33	34	0	0	19.5	0	0	0	0	0	1	5.27	6.86	19	107.5	1.11	0.26	5.03	0.15	11.9	25.6	18.2	2.1	0.25	0.25	0.3	0.25	0	0	0	0	6	0	0	5.06	5.3	17.77	1.28	0	0	1	0	0	11	12	8	2	0	12.5
350	35	32	0	0	22.37	1	0	0	0	0	2	6.81	6.78	15	147.1	0.499164	0.79	3.35	0.21	11.5	27.5	18.3	1.88	0.22	0.18	0.26	1.4	2	0	0	0	4	0	0	4.21	4.11	15.79	1.56	0	0	2	0	0	10	12	10	2	0	10.38
351	31	30	0	0	26.1	0	0	0	0	0	4	5.34	2.66	8	116.8	1.52	0.76	2.38	0.33	10.5	24.8	18.4	2.54	0.25	0.3	0.33	1.29	2	0	0	0	13	0	0	5.2	5.41	18.11	0.68	0	0	0	0	0	8	8	10	1	0	9.5
352	32	35	0	0	25.93	0	0	0	1	0	1	5.46	8.63	7	134.9	0.53	0.66	4.8	0.41	11.1	29.5	18	2.92	0.26	0.48	0.4	1.24	0	0	0	0	16	0	0	4.94	4.86	14.88	0.93	0	1	1	0	0	10	12	5	1	0	10
353	32	32	0	0	19.87	1	0	0	0	0	7	5.59	15.27	13	181.8	0.41	0.22	4.88	0.14	11.6	29.4	17.4	2.78	0.99	0.19	0.32	0.74	1	0	0	0	8	0	0	4.53	4.43	15.59	1.76	0	0	1	0	0	10	10	5	1	0	11
354	29	29	0	0	22.19	1	0	0	0	1	3	5.52	4.33	41	125.3	0.55	0.85	13.57	0.18	11.1	22.9	16.9	3.87	0.23	0.18	0.3	0.57	1	0	0	0	8	0	0	5.41	6.46	21.77	0.32	1	1	1	1	0	12	12	17	2	0	11
355	36	38	0	0	26.79	1	0	0	0	0	3	10.29	4.87	18	188.9	0.48	1.16	4.75	0.61	10.5	20.6	19.2	2.77	0.4	0.18	0.37	0.25	1	0	0	0	20	0	0	4.81	4.28	16.45	0.98	0	1	0	0	0	8	7	9	1	1	12
356	39	38	0	0	19.29	0	0	0	0	0	1	22.62	1.48	34	152.6	0.846348	0.33	0.41	0.19	11.8	26.3	17.2	2.58	0.28	0.21	0.41	0.75	0	0	0	0	23	0	0	5.5	4.38	15.53	1.35	0	0	1	0	0	4	3	16	2	0	9
357	31	32	0	0	21.7	0	0	0	0	0	2	6.04	31.52	31	130.6	1.74	1.34	7.22	0.07	11.8	25.1	18	2.57	0.23	0.17	0.26	1.54	2	0	0	0	6	0	0	4.75	3.1	11.12	1.61	0	1	1	0	0	13	15	7	2	0	8
358	23	25	0	0	18.14	0	0	0	0	0	1	5.99	4.64	15	133.5	0.641609	0.48	2.03	0.26	11.7	29.9	18.2	2.46	0.22	0.15	0.27	0.48	2	1	0	0	18	0	0	4.63	4.11	16.35	0.72	0	0	1	0	0	6	7	8	1	0	10
359	30	30	0	0	24.39	1	0	0	0	0	1	5.83	4.57	18	114.4	1.04431	0.7	1.41	0.29	11.6	27.5	18.2	3.05	0.23	0.18	0.54	1.45	1	0	0	0	9	0	0	5.51	4.59	16.92	3.09	0	0	1	0	0	4	7	3	2	0	9.5
360	32	33	0	0	23.11	0	0	1	0	1	1	8.56	4.58	23	192.5	0.26	0.79	2.73	0.14	10.9	27.5	17.9	2.39	0.25	0.18	0.3	0.85	0	0	0	0	6	0	0	4.82	5.77	16.28	0.89	0	1	1	0	0	9	11	9	1	0	10
361	30	28	0	0	23.18	1	0	0	0	0	3	6.73	7.82	33	200.1	0.569768	0.23	4.08	0.28	10.4	20.9	18.3	2.97	0.23	0.16	0.41	1.08	1	0	0	0	14	0	0	5.48	4.29	15.73	1.94	0	1	0	0	0	8	8	14	1	0	10
362	39	40	0	0	21.03	1	0	1	1	0	5	6.82	5.3	16	231.2	0.58567	0.23	0.53	0.23	10.9	21.1	18.5	2.7	0.28	0.17	0.33	1.09	0	0	0	0	18	0	0	4.3	4.02	15.61	1.36	0	1	1	0	0	2	4	10	2	0	9
363	32	31	0	1	24.15	0	0	1	0	0	1	5.82	13.25	10	107.2	0.98	0.32	10.32	0.07	10.3	22.9	18.2	2.54	0.3	0.17	0.31	0.57	1	0	0	0	5	0	0	5.12	4.65	16.39	3.81	0	0	2	0	0	16	18	19	1	0	10
364	24	25	0	0	23.59	0	0	0	0	0	3	3.16	3.72	15	135.1	0.45	0.21	8.23	0.2	11.6	11.2	15.1	2.62	0.24	0.15	0.3	1.91	2	0	0	0	10	0	0	4.57	4.94	18.48	1.74	0	0	1	0	0	10	12	2	2	0	9.5
365	32	34	0	0	19.29	1	0	0	1	0	5	6.04	6.09	7	184.8	0.78	0.22	9.12	0.14	11.3	23.6	18.3	2.47	0.22	0.23	0.31	1.43	0	0	0	0	4	0	0	4.47	5.33	20.48	1.54	0	0	1	0	0	15	25	12	2	0	11
366	33	33	0	0	17.73	1	0	0	1	1	1	8.6	11.11	24	210.3	0.9	0.16	1.91	0.24	11.1	24.1	18.2	2.42	0.22	0.14	2.27	2.13	0	0	0	0	6	0	0	4.76	4.86	14.07	2.5	0	0	0	0	0	4	7	13	1	0	10
367	38	38	0	1	24.37	1	0	0	0	0	3	6.27	3.14	23	163.2	0.71	0.44	1.77	0.18	11.1	38.5	17.5	2.76	0.21	0.38	0.32	0.91	2	0	0	0	16	0	0	4.95	5.56	15.97	2.47	0	0	1	0	0	6	8	10	2	0	9.5
368	27	31	0	0	22.47	1	0	0	0	0	2	5.16	4.66	19	131.5	0.866	0.58	5.32	0.14	10.7	25.2	18	2.32	0.22	0.22	0.24	1.35	0	0	0	0	5	0	0	4.63	4.41	14.29	4.45	0	0	0	0	0	10	10	12	2	0	10
369	27	27	0	1	27.79	1	0	0	0	0	5	6.07	8.44	13	166.8	0.811667	0.24	5.23	0.25	10.8	24.4	17.8	3.13	0.25	0.25	0.3	0.49	2	0	0	0	17	0	0	6.19	5.63	14.43	1.2	0	0	1	0	0	11	10	11	2	0	10
370	34	34	0	0	26.2	0	0	1	0	1	2	8.12	4.23	20	142.6	0.88	0.34	0.14	0.34	11.3	20.3	18.4	2.92	0.26	0.22	0.28	0.54	1	0	0	0	30	0	0	6.36	3.94	15.18	2	0	0	1	0	0	3	2	12	2	0	10
371	30	32	0	0	21.38	1	0	1	0	0	4	4.83	6.11	24	266.1	0.42	0.59	17.9	0.07	12.8	33.9	17	2.52	0.23	0.16	0.3	1.49	2	0	0	0	5	0	0	6.6	3.64	14.61	1.88	1	1	1	0	0	18	22	13	2	0	10
372	32	33	0	0	21.11	1	1	0	0	0	6	6.93	6.39	23	82.48	0.54	0.36	7.74	0.07	11	24	18	2.15	0.22	0.16	0.29	0.5	1	0	0	0	6	0	0	5.34	6.63	22.84	0.02	1	0	1	0	0	10	12	6	2	0	9.5
373	31	30	0	0	20.35	0	1	0	0	0	1	6.16	5.98	22	123.8	1.08	0.25	3.6	0.29	11.3	22.8	17.8	3.08	0.24	0.14	0.4	0.25	0	0	0	0	7	0	0	4.77	4.59	19.19	1.24	0	0	0	0	0	8	11	17	1	0	9.5
374	27	30	0	1	16.84	1	0	1	0	0	2	24.78	11.58	23	182.8	0.16	1.66	0.11	0.08	10.1	25.2	17.3	2.5	0.24	0.14	0.31	1.34	3	0	0	0	6	0	0	5.17	4.89	17.31	2.2	0	1	1	0	0	3	0	8	1	0	8
375	36	33	0	0	26.18	0	1	1	0	0	2	11.64	3.51	22	102.2	0.565579	0.76	0.85	0.34	12	23.9	17.5	3.35	0.21	0.16	0.32	1.35	3	0	0	0	5	0	0	5.35	4.42	12.42	2.68	1	0	0	0	0	6	4	9	2	0	10
376	31	29	0	0	16.8	1	1	0	0	0	4	9.82	4.99	34	135.4	0.13	0.96	2.2	0.14	11.1	23.6	19.5	1.7	0.4	0.26	0.27	0.92	1	0	0	0	4	0	0	5.48	4.5	18.27	1.82	0	0	0	0	0	5	2	21	2	0	9
377	35	31	0	0	22.58	0	0	0	0	0	3	5.29	6.67	15	180.8	0.84	0.28	4.87	0.14	12	26.8	17.8	2.02	0.22	0.16	0.25	0.25	2	0	0	0	24	0	0	4.09	4.54	16.25	2.02	0	0	1	0	0	8	9	10	1	0	10
378	27	36	0	0	21.78	1	1	0	0	0	1	4.79	4.65	10	111.1	0.42	1.05	7.36	0.15	11	24.8	17.9	3.32	0.22	0.18	0.32	0.56	0	0	0	0	7	0	0	5.11	5.06	16.32	1.92	1	1	0	0	0	14	13	3	1	0	11
379	33	31	0	0	19.96	0	1	0	0	0	1	5.59	6.66	10	138.1	0.11	0.57	2.85	0.16	11.3	23.6	17.7	2.36	0.26	0.15	0.26	0.88	1	0	0	0	7	0	0	4.6	4.41	20.24	2.65	0	0	0	0	0	4	6	17	1	1	12
380	35	36	0	1	21.25	1	0	0	0	0	9	8.64	6.05	85	219.3	0.57	0.14	1.62	0.16	11.1	27.4	18.7	2.82	0.25	0.15	0.29	1.37	2	0	0	0	20	0	0	4.92	4.24	13.83	2.25	0	0	1	0	0	5	4	3	2	0	14
381	30	37	0	1	21.65	1	1	0	1	1	3	5.38	3.14	9	369.4	0.879613	0.79	4.32	0.16	10.8	25.5	17.3	2.82	0.24	0.28	0.26	0.76	1	0	0	0	8	0	0	5.07	4.81	13.37	2.02	0	0	0	0	0	5	5	21	1	1	9
382	25	25	0	1	22.92	1	1	0	0	0	1	7.08	2.94	20	86.92	0.67	1.01	4.54	0.13	12.1	25.5	18	2.29	0.28	0.2	0.52	0.65	3	0	0	0	3	0	0	4.82	5.4	15.88	1.76	0	0	0	0	0	11	10	7	1	1	10
383	29	30	0	0	21.45	1	0	0	0	0	3	5.79	7.12	19	269.5	0.4	1.08	6.08	0.17	10.3	22.6	19.8	1.79	0.26	0.16	0.24	0.63	3	0	0	0	3	0	0	4.77	4.49	18.79	1.45	0	0	1	0	0	17	15	10	2	0	11.5
384	29	29	0	0	22.81	1	1	0	0	0	2	4.89	5.88	22	123	0.41	0.26	6.3	0.2	11.1	24.1	17.6	2.92	0.23	0.15	0.3	0.25	1	0	0	0	9	0	0	4.84	4.9	17.6	1.75	0	0	0	0	0	6	7	12	2	0	9
385	32	35	0	0	28.49	0	1	0	0	0	5	3.91	3.03	27	169.25	0.36	0.48	6.69	0.12	10.6	24.9	18.4	2.58	0.23	0.14	0.28	0.44	0	0	0	0	7	0	0	5.44	5.09	13.35	2.43	1	0	2	0	0	11	11	12	2	0	10
386	33	35	0	1	19.44	1	1	0	0	0	7	7.14	6.77	30	109.8	0.55	0.6	2.93	0.13	11.2	24.9	17.1	2.58	0.27	0.14	0.22	1.14	0	0	0	0	12	0	0	5.24	5.04	15.21	2.28	0	0	0	0	0	9	10	11	2	0	10
387	31	30	0	0	25.19	1	1	0	0	0	3	5.35	4.65	15	294.9	0.6	0.52	5.32	0.2	11.1	24.4	17.6	3.1	0.22	0.19	0.26	0.51	2	0	0	0	4	0	0	5.27	5.1	13.56	1.54	0	1	1	0	0	8	6	8	2	0	10
388	32	36	0	0	21.11	1	1	0	0	0	1.5	7.55	2.94	15	319.6	0.39	0.87	1.87	0.18	11.5	23.8	18.1	2.11	0.22	0.17	0.24	0.4	1	0	0	0	5	0	0	4.43	4.82	18.57	1.89	0	0	1	0	0	4	4	11	2	0	8
389	33	35	0	0	21.41	1	0	0	1	0	4	7.41	5.94	24	135.2	0.7	0.21	3.3	0.21	11.3	30.2	18.2	2.77	0.22	0.28	0.23	1.69	0	0	0	0	11	0	0	5	4.48	18.67	1.87	1	1	2	0	0	10	7	9	2	0	13
390	32	32	0	0	22.46	1	0	0	0	0	5	7.71	4.64	20	84	0.667432	0.58	2.53	0.34	10.5	22.6	17.8	2.66	0.22	0.29	0.52	1.01	2	0	0	0	12	0	0	5.3	4.84	16.78	0.98	0	0	2	0	0	7	6	12	1	0	14
391	37	34	0	1	22.56	0	1	0	0	0	1	4.38	12.98	11	101.8	0.58	0.38	1.84	0.27	10.4	22	18.6	2.7	0.23	0.16	0.32	1.76	3	0	0	0	21	0	0	4.91	4.19	16.21	1.79	0	1	1	0	0	8	10	10	1	1	9.5
392	38	41	0	0	24.32	0	1	0	0	0	2	5.26	5.26	33	93.8	0.637346	0.77	3.39	0.18	11.2	25.4	18.6	1.95	0.39	0.16	0.3	0.68	1	0	0	0	9	0	0	4.67	4.37	12.79	2.54	0	0	2	0	0	5	5	18	2	0	11
393	38	35	0	0	24.56	0	0	0	0	0	2	3.58	2.62	19	83.38	0.31	0.18	1.97	0.27	10.9	26.5	17.9	3	0.24	0.19	0.3	0.87	3	0	0	0	25	0	0	5.5	5.05	12.66	2.03	0	0	1	0	0	7	7	4	1	0	12
394	36	39	0	0	21.93	0	0	0	0	0	1	7.75	6.37	13	127.3	0.487023	0.3	4.77	0.32	11.1	23.2	17.3	3.28	0.24	0.14	0.24	0.8	1	0	0	0	30	0	0	4.52	5.19	15.51	1.49	1	1	2	0	0	11	10	7	1	1	10
395	31	34	0	0	24.07	1	1	0	0	0	5	5.64	7.28	21	86.44	0.78	1.27	5.9	0.2	11.1	24.28	18.35	2.69	0.25	0.27	0.22	2.07	1	0	0	0	5	0	0	5.27	4.39	20.8	2.14	0	0	1	0	0	11	13	2	1	0	10.39
396	33	36	0	0	24.29	0	1	0	0	1	3	5.92	4.99	20	124.7	0.757716	0.88	3.64	0.31	11.3	28.3	17.9	2.35	0.52	0.21	0.43	1.46	2	0	0	0	5	0	0	4.75	4.75	13.44	1.19	0	0	0	0	0	10	8	2	2	0	8
397	32	33	0	0	18.96	1	0	0	0	0	5	1.57	0.82	29	196.8	0.67	0.22	2.24	0.36	11.5	23.7	18.5	2.58	0.22	0.16	0.21	0.72	0	0	0	0	12	0	0	4.28	4.42	15.6	2.83	0	0	1	0	0	5	5	14	2	0	8
398	33	31	0	0	18.44	1	1	0	0	0	4	5.49	9.3	20	318.4	1.12	0.36	2.08	0.22	11.7	24.4	17.5	2.89	0.24	0.16	0.32	0.52	1	0	0	0	11	0	0	4.35	4.37	17.57	6.54	1	1	0	0	0	7	3	7	2	0	11
399	41	40	0	0	20.85	1	1	0	0	0	14	6.53	6.2	13	258.4	0.81	0.68	1.87	0.25	11.4	23.7	18.7	2.62	0.47	0.16	0.25	1.06	0	0	0	0	19	0	0	4.88	4.66	15.13	1.86	0	0	1	0	0	4	5	7	2	0	10
400	26	26	0	0	22.75	1	1	0	1	1	2	6.87	6.82	14	159.62	1.35	0.84	3.64	0.15	12	30.4	17.4	3.55	0.28	0.2	0.38	1.47	2	0	0	0	15	0	0	5.66	5.02	16.6	1.99	0	0	0	0	0	15	15	6	2	0	10
401	27	29	0	1	24.92	0	0	0	0	0	2	5.03	5.29	14	576.3	0.874616	0.74	3.53	0.19	11.2	24.6	17.6	2.69	0.22	0.13	0.32	1.25	0	0	0	0	15	0	0	4.81	4.54	16.52	3.54	0	1	1	0	0	9	9	7	2	0	11
402	33	32	0	0	27.1	1	1	0	0	0	4	4.08	5.31	33	88.8	0.623502	0.55	3.71	0.28	10.8	24.9	18.4	3.18	0.22	0.16	0.29	0.55	0	0	0	0	17	0	0	4.9	4.62	13.73	2.79	1	0	2	0	0	9	10	9	1	0	10
403	35	29	0	0	23.59	1	1	0	0	0	1	13.84	4.79	5	163.7	0.24	1.21	1.95	0.18	11.2	27	18.8	2.22	0.22	0.16	0.27	2.11	2	0	0	0	4	0	0	4.65	4.45	14.69	1.64	0	0	1	0	0	3	3	6	2	0	12
404	38	38	0	0	22.47	0	0	0	1	0	2	5.46	3.91	18	125.1	0.75	0.59	4.28	0.25	10.5	23.1	18.7	2.5	0.27	0.14	0.27	1.21	0	0	0	0	13	0	0	4.74	4.14	16.85	2.09	0	0	2	0	0	7	8	12	2	0	10
405	30	29	0	0	25.86	1	1	0	0	0	7	6.81	2.37	23	109.8	0.17	0.63	2.55	0.16	11.5	25	17.7	2.58	0.25	0.16	0.29	1	1	0	0	0	8	0	0	4.67	4.27	13.99	2.52	0	0	0	0	0	7	6	9	2	0	12
406	42	42	0	1	26.93	0	0	0	1	0	4	9.95	2.28	14	173	0.67	0.69	0.24	0.17	10.4	22.5	18.3	2.39	0.25	0.19	0.28	0.66	2	0	0	0	18	0	0	4.56	4.88	16.63	1.56	0	0	1	0	0	3	3	10	2	0	9
407	38	36	0	0	22.81	0	0	0	1	1	2	5.92	5.46	22	144.9	0.19	0.67	6.63	0.15	10.8	27.7	19.1	2.33	0.24	0.16	0.27	1.29	0	0	0	0	16	0	0	5.04	4.97	18.48	2.49	0	0	0	0	0	4	6	6	1	0	9
408	28	28	0	0	21.92	1	1	0	0	0	2	2.94	5.47	20	144.1	0.54	0.68	1.71	0.18	11.6	30.2	18.5	2.43	0.24	0.19	0.28	1.12	2	0	0	0	17	0	0	5.3	4.91	18.71	1.2	0	0	1	0	0	7	6	13	2	0	10
409	27	30	0	0	23.61	1	1	0	0	0	2	7.82	3.42	19	199	0.52	0.44	0.55	0.18	11	24.9	17.5	2.51	0.3	0.2	0.28	1.72	1	0	0	0	5	0	0	4.4	6	16.18	1.46	0	0	0	0	0	4	2	9	2	0	11
410	36	37	0	0	19.98	0	0	0	0	0	2	8.74	5.5	18	106.6	1.23	0.12	6.36	0.23	11	23.6	18.5	2.12	0.21	0.14	0.51	0.42	2	0	0	0	11	0	0	4.58	5	17.57	1.35	0	0	2	0	0	8	10	12	1	0	9
411	38	41	0	0	28.65	1	0	0	0	1	8	3.25	16.82	24	123.8	0.61	0.48	0.8	0.19	12.5	33	19.4	2.99	0.22	0.21	0.3	0.81	2	0	0	0	18	0	0	4.63	4.68	15	1.69	0	0	1	0	0	7	7	13	2	0	12
412	36	34	0	0	24.92	1	1	0	0	0	4	6.81	8.87	14	149.2	0.819853	0.54	2.31	0.3	11	23.5	16.9	3.41	0.24	0.16	0.3	0.58	1	0	0	0	15	0	0	4.42	5.11	15.56	2.49	0	0	1	0	0	4	4	10	2	0	11
413	37	37	0	0	20.35	1	1	0	1	0	3	6.24	7.41	17	63.64	0.52	0.2	9.48	0.06	14.1	30.7	17.9	3.18	0.32	0.02	0.4	0.8	1	0	0	0	7	0	0	5.05	5.01	22.4	3.04	0	0	0	0	0	11	11	5	1	1	11
414	27	29	0	0	27.16	1	0	0	0	0	2	3.63	32.26	11	152.5	1.06433	0.59	5.63	0.05	10.5	25	19.7	2.61	0.25	0.19	0.24	1.02	0	0	0	0	9	0	0	4.93	4.62	15.56	4.12	0	0	0	0	0	13	13	5	2	0	12
415	40	40	0	0	32.13	1	1	0	0	0	9	4.77	3.4	13	91	0.802805	0.61	3.04	0.22	10.7	28.3	17.7	3.79	0.28	0.23	0.24	1.22	2	0	0	0	14	0	0	5.06	4.22	13.43	2.14	0	0	0	0	0	20	20	11	2	0	11
416	30	32	0	0	18.9	1	0	0	0	0	3	5.87	7.65	19	238.3	0.92	0.85	3.32	0.15	11.62	26.81	17.58	2.51	0.23	0.18	0.34	0.5	0	0	0	0	13	0	0	4.76	4.42	12.55	1.4	0	0	0	0	0	9	8	10	2	1	10.68
417	31	33	0	1	17.9	1	1	0	0	0	3	11.06	3.89	14	152.9	0.63	0.95	0.85	0.29	14	27.7	17.9	2.54	0.22	0.13	0.34	0.48	0	0	1	0	7	0	0	4.42	4.44	18.84	0.71	0	0	1	0	0	2	2	8	2	0	10
418	25	32	0	0	21.24	1	0	0	0	0	1	4.6	3.79	17	160.2	0.62	1.18	5.04	0.25	12.2	27.8	18.1	2.96	0.29	0.15	0.23	1.22	1	0	0	0	16	0	0	4.63	4.71	16.28	1.65	1	0	2	0	0	10	8	2	2	0	11
419	37	38	0	0	19.98	0	0	0	0	0	1	5.28	5.11	19	188.3	0.28	0.7	0.89	0.18	11.46	27.58	16.96	2.37	0.23	0.16	0.29	0.83	2	0	0	0	7	0	0	4.7	3.78	1.29	2.12	0	0	0	0	0	6	7	6	2	0	9.99
420	31	32	0	0	18.93	0	0	0	0	0	2	4.14	4.06	27	166.07	0.61	0.43	5.63	0.1	11.7	26.5	17.6	2.53	0.25	0.16	0.29	0.41	2	0	0	0	11	0	0	4.63	5.56	17.74	1.38	0	0	1	0	0	8	12	9	2	0	10
421	32	33	0	1	23.46	1	1	0	0	0	6	6.62	5.64	19	87.02	0.508753	0.59	4.24	0.23	11.5	23.5	17.7	2.58	0.24	0.22	0.32	0.93	0	0	0	0	10	0	0	4.54	4.93	15.3	1.64	1	0	1	0	0	8	9	11	2	0	10
422	38	39	0	0	26.86	0	0	0	0	0	1	6.33	6.51	15	127.4	0.88	0.5	4.26	0.17	10.8	24.7	18.1	2.82	0.24	0.21	0.29	0.71	1	0	0	0	10	0	0	5.11	6.32	20.93	0.35	1	1	1	0	0	12	13	11	1	1	9
423	31	29	0	1	20.98	0	0	0	0	1	1	13.2	4.29	20	124.3	1.3	1.36	1.63	0.19	10.9	23.1	18	2.8	0.24	0.18	0.23	1.02	0	0	0	0	17	0	0	4.85	5.42	15.98	7.53	0	0	1	0	0	4	3	19	1	0	9
424	29	28	0	1	24.37	1	0	0	0	0	3	7.87	6.67	21	164.4	0.86	0.35	2.36	0.31	10.9	22.1	18	3.49	0.24	0.18	0.33	1.15	1	0	0	0	16	0	0	4.67	5.79	20.31	3.29	0	0	1	0	0	6	5	10	2	0	10
425	32	34	0	0	20.7	1	0	0	0	1	6	6	8.73	21	147.4	0.92	0.14	3.01	0.2	10.9	23.1	16.9	3.26	0.24	0.16	0.28	0.26	1	0	0	0	20	0	0	5	4.69	13.95	1.77	0	0	1	0	0	4	8	13	2	0	10.51
426	34	36	0	0	21.78	1	1	0	1	1	5	4.65	4.74	13	119.5	1.4	0.34	2.61	0.17	11	25.9	18.4	2.53	0.23	0.19	0.38	1.71	0	0	0	0	24	0	0	5.55	5.1	15.49	1.47	0	0	1	0	0	7	7	13	1	1	10
427	33	32	0	0	22.42	1	1	0	0	0	1	8.39	8.76	19	90.7	1.36	1.13	2.79	0.13	11	22.2	17.8	2.29	0.29	0.34	0.34	0.78	3	0	0	0	6	0	0	4.63	4.45	17.7	2.45	0	0	0	0	0	6	6	10	1	0	11
428	34	34	0	0	21.78	0	0	1	0	0	2	8.01	5.03	15	131.9	0.49	1.39	2.05	0.58	11.4	23	18.9	2.22	0.26	1.02	0.46	0.3	0	0	0	0	6	0	0	4.66	4.48	12.82	2.66	0	0	2	0	0	4	5	5	2	0	11.5
429	38	36	0	0	21.41	1	1	0	1	0	1	7.5	3.93	19	120.3	0.11	0.69	2.21	0.22	12.1	29.8	18.1	2.51	0.22	0.16	0.25	1.77	0	0	0	0	4	0	0	4.51	4.17	17.2	2.44	0	0	1	0	0	5	5	10	2	0	9.5
430	26	27	1	1	28.47	1	1	1	0	0	2	5.69	6.01	20	195	0.622723	0.29	4.08	0.25	11.25	25.63	18.46	2.87	0.32	0.19	0.51	0.53	0	0	0	0	13	0	0	5.02	6.17	19.1	1.67	0	0	1	0	0	14	10	3	2	0	10.9
431	31	31	0	0	27.49	1	1	0	0	0	3	6.74	3.72	21	135.8	0.756255	0.37	3.83	0.14	11.1	28.1	18.7	2.46	0.24	0.16	0.38	1.13	2	0	0	0	10	0	0	4.77	5.14	17.53	2.34	0	0	0	0	0	9	9	18	2	0	11
432	32	29	1	0	28.49	0	1	0	0	0	1	6.87	4.31	15	236.8	1.05	0.32	6.17	0.32	11.13	24.94	17.93	2.99	0.23	0.17	0.29	1.28	3	0	0	0	18	0	0	5.07	4.11	14.03	1.9	0	0	2	0	0	16	15	14	1	0	10.65
433	33	35	0	0	17	0	1	0	0	0	1	6.64	3.98	39	159.1	0.88	0.67	4.04	0.05	12.2	25.9	19.6	2.25	0.28	0.16	0.32	1.85	3	0	0	0	6	0	0	4.77	4.82	21.23	3.5	0	0	1	0	0	9	8	24	1	0	9.5
434	32	30	0	0	19.08	0	0	0	0	1	4	7.87	3.53	24	74.88	0.73	0.75	1.17	0.32	11.3	23.2	20.4	1.85	0.23	0.2	0.28	0.26	1	0	0	0	8	0	0	4.83	4.44	15	1.53	1	1	1	0	0	3	2	9	1	0	10
435	32	31	0	0	22.56	1	0	0	0	0	4	4.97	4.78	16	212.1	0.568331	0.73	1.85	0.2	10.9	28.6	17.8	2.87	0.23	0.17	0.28	1.02	3	0	0	0	9	0	0	5.01	4.69	16.11	0.97	0	0	0	0	0	8	3	11	1	0	9
436	31	32	0	0	36.92	0	0	0	0	0	7	3.69	1.73	22	122.6	0.661832	0.78	7.79	0.13	11.9	29.6	18.6	3.1	0.3	0.15	0.3	1.33	2	0	0	0	14	1	0	5.56	4.78	18.48	3.64	0	0	2	0	0	14	14	21	2	0	9
437	32	32	1	0	19.87	1	0	0	0	0	2	4.68	3.72	8	180	0.24	0.75	4.27	0.3	11.65	25.31	18.54	2.23	0.75	0.3	0.33	0.67	0	0	0	0	11	0	0	4.44	4.57	16.97	3.32	0	0	2	0	0	8	8	6	2	0	10.75
438	36	39	0	1	25.3	0	0	0	1	0	1	7.63	3.81	39	157.5	0.35	0.2	0.82	0.23	10.7	21	17.6	2.91	0.41	0.26	0.34	2.03	1	0	0	0	19	0	0	8.3	5.3	19.53	0.44	0	0	0	0	0	8	7	7	1	0	13
439	29	27	0	1	22.73	0	1	0	0	0	1	6.25	6.01	11	77.64	0.25	0.56	1.95	0.19	10.6	28.3	18.7	2.14	0.25	0.2	0.28	0.96	0	0	0	0	14	0	0	4.69	5.03	15.84	2.99	0	0	1	0	0	7	7	21	1	0	11
440	34	34	0	0	23.18	0	1	0	0	0	7	6.74	5.09	59	118.1	0.5	0.65	0.17	0.31	11.7	28.8	17.9	3.71	0.3	0.16	0.56	0.71	2	0	0	0	28	0	0	4.47	4.6	14.17	3.08	0	0	1	0	0	2	3	7	1	0	9.5
441	35	33	0	0	20.78	1	0	0	0	1	9	4.25	5	17	104.2	0.7	0.55	3.45	0.15	10.3	23.4	18.6	2.7	0.24	0.25	0.27	0.35	2	0	0	0	14	0	0	5.23	4.84	16.13	2.33	1	0	0	0	0	11	10	10	2	0	10
442	24	25	0	0	22.46	1	1	0	0	0	1	13.63	1.91	24	164.18	0.43	1.32	3.78	0.19	11.5	24.4	18.5	2.57	0.25	0.15	0.29	0.39	0	0	0	0	24	0	0	4.64	5.18	16.98	0.85	0	0	1	0	0	9	7	17	1	1	12
443	27	30	0	0	24.49	0	0	1	1	1	1	6.35	4.41	20	102.1	0.69	1.19	3.06	0.3	11.5	23.9	17.9	2.8	0.24	0.19	0.26	0.66	3	0	0	0	17	0	0	5.13	4.69	15.53	2.92	1	1	2	0	0	10	10	6	1	1	10
444	35	38	0	0	25.56	1	1	0	0	0	3	6.25	4.05	21	151.8	1.32	0.15	1.46	0.24	11.2	23.1	17.1	3.63	0.26	0.14	0.28	1.35	2	0	0	0	18	0	0	4.75	4.33	15.45	1.63	0	0	0	0	0	6	2	7	2	0	8.5
445	32	32	0	0	18.88	0	0	0	0	1	7	5.93	2.72	11	132.9	0.989876	0.57	5.51	0.1	11.8	33.6	19.4	1.61	0.22	0.2	0.26	1.32	2	0	0	0	4	0	0	4.61	5.33	17.92	1.86	0	1	0	0	0	10	8	6	2	0	9.5
446	35	32	0	0	20.47	0	0	0	0	0	3	5.36	6.86	19	128.2	0.900113	0.11	2.87	0.14	11.2	27	18.6	1.73	0.23	0.2	0.26	0.98	1	0	0	0	3	0	0	4.43	4.7	14.92	0.95	0	0	1	0	0	10	12	6	1	1	9.5
447	32	30	0	0	19.38	1	1	0	1	1	8	6.83	3.76	23	110.1	0.7	0.74	3.39	0.25	11.4	22.9	18.4	2.57	0.3	0.23	0.29	0.87	1	0	0	0	21	0	0	4.85	5.26	17.4	0.69	0	1	1	0	0	4	6	14	2	0	9.5
448	33	31	0	0	24.61	1	0	0	1	1	5	5.98	3.4	7	92.5	1.49	0.44	3.27	0.27	11.4	21.6	18.5	2.69	0.29	0.19	0.34	0.86	1	0	0	0	7	0	0	4.82	4.53	16.27	1.8	1	1	1	0	0	11	14	14	2	0	9
449	32	30	0	1	18.52	1	0	0	1	1	3	2.42	1.3	19	72.27	1.5	0.73	5.43	0.2	12.7	28.8	19.1	1.71	0.31	0.25	0.34	1.47	0	0	0	0	7	0	0	5.17	5.05	16.46	2.16	0	0	0	0	0	8	9	14	2	0	11
450	30	31	0	0	26.77	1	0	0	0	0	4	5.13	7.46	19	189.6	0.877104	0.51	6.27	0.24	11.6	26.1	17.8	3.22	0.23	0.14	0.41	1.02	2	0	0	0	13	0	0	4.1	4.66	15.35	1.95	0	1	0	0	0	16	16	10	2	0	13
451	33	31	0	0	20.85	1	1	0	0	0	6	7.75	8.92	14	80.86	0.7	0.44	1.69	0.7	11.4	20.2	17.4	3.41	0.25	1.19	0.31	0.81	1	0	0	0	11	0	0	5.21	5.27	16.92	1.99	0	0	2	0	0	5	7	4	2	0	11
452	29	34	0	0	20.66	0	0	0	0	0	1	6.25	4.45	24	106.5	0.499794	1.15	1.98	0.25	12	27.7	17.6	2.7	0.24	0.14	0.27	1.89	2	0	0	0	8	0	0	4.28	4.32	15.87	4.54	0	0	0	0	0	7	5	12	1	0	10
453	31	32	0	1	21.23	1	1	0	1	1	4	7.87	6.9	21	195	0.792758	0.87	2.63	0.32	11.1	24	18.6	2.32	0.25	0.16	0.26	0.32	0	0	0	0	22	0	0	4.47	5.4	19.18	3.55	0	0	1	0	0	3	6	8	2	0	10
454	31	32	0	1	22.83	0	0	0	0	1	2	5.57	4.59	14	136.8	1.04219	0.73	3.19	0.26	11.1	24.7	17.7	2.94	0.3	0.23	0.29	1.27	2	0	0	0	15	0	0	4.83	3.9	13.5	0.41	0	0	1	0	0	7	8	5	2	0	9.5
455	35	33	0	0	24.03	1	0	0	0	0	4	7.28	2.68	29	173.5	0.900762	1.29	0.96	0.16	11.1	31	18.9	2.77	0.25	0.22	0.26	1.19	2	0	0	0	12	0	0	5.1	5.11	23.73	0.46	1	1	1	0	0	4	5	5	2	0	9
456	34	36	0	0	20.1	0	0	0	0	1	1	6.18	3.02	17	151.1	1.38	0.45	2.83	0.21	11.8	23	19.3	2	1.43	0.14	0.23	1.47	1	0	0	0	7	0	0	5.12	4.61	18.76	0.76	0	0	0	0	0	7	7	22	2	0	8.5
457	32	35	0	0	20.11	1	0	0	0	0	2	6.52	3.51	31	237.3	0.854459	1.58	3.71	0.13	11.2	25.7	18.5	1.93	0.34	0.16	0.34	0.59	1	0	0	0	10	0	0	4.4	5.04	16.46	1.7	0	0	1	0	0	8	5	4	2	0	12
458	35	33	0	0	26.01	1	1	0	0	1	2	4.79	5.25	11	172.78	2.04	0.84	2.2	0.2	10.6	21.1	17.7	2.94	0.23	0.16	0.3	0.74	1	0	0	0	9	0	0	4.82	5.59	15.6	2.17	0	0	1	0	0	8	6	9	2	0	9.5
459	30	37	0	0	23.59	1	1	0	0	1	2	5.77	2.88	15	187	0.686526	0.2	3.31	0.15	10.5	20.8	18.2	2.43	0.24	0.21	0.36	0.66	0	0	0	0	9	0	0	4.8	4.66	16.57	4.26	0	0	1	0	0	5	5	16	2	0	12
460	30	30	0	0	32.04	0	0	0	0	0	4	5.72	7.85	15	84.76	0.21	1.28	6.22	0.52	10.6	21.1	18.6	2.61	0.56	0.33	0.27	0.21	3	0	0	0	20	0	0	4.75	5.06	17.65	3.04	0	0	3	1	0	17	16	4	1	0	11
461	33	40	0	0	30.27	0	1	0	1	0	3	4.94	2.38	5	214.3	1.11	0.92	3.04	0.18	10.8	23.9	18.2	2.78	0.26	0.21	0.38	1.08	2	0	0	0	15	0	0	5.73	4.66	16.94	1.98	0	0	1	0	0	16	10	20	2	0	7.5
462	37	39	0	1	28.67	0	0	0	0	0	1	5.58	4.98	14	180.5	1.55	0.67	4.85	0.16	10.6	22.5	18.1	2.69	0.84	0.2	0.28	0.69	2	0	0	0	5	0	0	4.4	4.69	16.5	2.59	0	0	2	0	0	13	12	9	1	0	9.5
463	36	34	0	0	28.38	1	0	0	1	1	4	5.55	3.27	19	112.3	1.01154	1.31	5.38	0.22	11.2	20.8	18.8	3.16	0.24	0.22	0.29	0.84	1	0	0	0	30	0	0	4.94	4.76	20.64	2.09	0	0	1	0	0	7	6	10	2	0	9
464	29	31	0	0	17.73	1	0	0	0	1	4	6.02	5.42	15	121.6	0.425325	0.36	1.52	0.14	11.2	27.4	19.4	2.04	0.23	0.18	0.3	0.78	0	0	0	0	4	0	0	4.71	4.75	16.05	3.28	0	0	1	0	0	8	4	6	2	0	10
465	32	37	0	0	24.56	1	0	0	0	0	1	9.59	8.98	23	173.04	0.709951	0.93	3.36	0.22	12.7	30.4	17.6	2.51	0.34	0.58	0.79	0.23	0	0	0	0	5	0	0	4.78	5.18	17.14	2.68	1	0	1	0	0	3	5	12	2	0	12
466	35	32	0	0	23.95	1	0	0	0	0	10	5.49	3.98	21	128.2	0.559584	1.01	1.83	0.12	11.5	24.8	17.7	2.5	0.25	0.16	0.31	1.38	1	0	0	0	10	0	0	3.96	5.56	17.51	2.33	0	0	1	0	0	6	8	10	1	0	10
467	37	39	0	0	20.35	1	0	0	0	0	6	5.92	6.19	14	101.7	0.46215	0.91	1.32	0.15	11.6	25.7	17	2.62	0.22	0.24	0.33	1.68	2	0	0	0	5	0	0	5.11	5.06	18.13	1.84	0	0	0	0	0	3	3	2	2	0	10.5
468	32	34	1	0	25.54	1	0	0	0	0	3	6.92	5.71	22	135	0.87	0.83	4.39	0.15	10.99	23.93	18.2	2.77	0.24	0.14	0.42	0.62	2	0	0	0	11	0	0	5.26	5.38	17.78	3.68	0	0	1	0	0	7	9	5	1	0	10.13
469	28	27	0	0	21.24	0	0	0	0	0	1	6.79	3.93	20	239.5	1.69	0.55	2.73	0.18	13.9	28.1	17.1	1.81	0.25	0.19	0.3	0.69	0	0	0	0	6	0	0	4.85	4.77	18.7	1.96	0	1	1	0	0	4	5	4	1	1	9
470	30	30	0	1	21.63	0	0	0	0	0	2	7.7	3.22	8	126.1	0.24	0.32	0.87	0.26	11	26.6	18	2.99	0.26	0.14	0.31	0.73	2	0	0	0	15	0	0	4.21	4.78	14.43	5.54	0	0	1	0	0	6	5	5	2	0	9
471	32	29	0	0	23.59	0	0	0	0	0	2	4.38	5.01	25	186.7	0.64	0.37	3.27	0.36	10.5	20.3	17.3	2.99	0.25	0.17	0.31	1.28	1	0	0	0	10	0	0	5.4	4.64	18.57	1.87	0	0	1	0	0	9	10	13	1	0	11
472	29	32	0	0	25.55	1	0	0	0	0	1	7.06	6.9	18	113.1	0.56	0.6	2.55	0.13	10.9	25.5	18.3	2.75	0.59	0.16	0.3	1.55	3	0	0	0	11	0	0	5.19	5.23	11.58	0.19	0	0	0	0	0	15	13	21	2	0	12
473	36	38	0	0	25.54	0	0	0	0	0	1	4.69	2.57	47	165.34	0.635947	1.21	4.59	0.15	10.1	20.1	18.2	2.85	0.28	0.18	0.34	0.71	0	0	0	0	14	0	0	5.39	4.91	12.84	7.39	1	0	0	0	0	9	11	25	2	0	10
474	32	32	0	0	24.24	0	0	0	0	0	2	6.26	5.72	76	140.8	0.19	0.64	2.06	0.29	11.4	22.9	19.2	1.88	0.28	0.16	0.33	1.31	3	0	0	0	5	0	0	4.77	5.62	19.36	3.62	0	0	1	0	0	4	5	12	2	0	11
475	25	26	0	0	24.24	0	0	0	0	1	4	4.56	6.84	20	331.6	0.67	2.52	4.63	0.14	11.4	26.7	18.6	2.28	0.23	0.13	0.24	0.9	1	0	0	0	6	0	0	4.73	5.14	18.83	1.82	0	0	1	0	0	12	12	18	2	0	11
476	31	40	0	0	22.81	0	1	0	0	0	1	6.67	15.04	13	62.81	0.66	0.75	10.55	0.15	11.3	23.8	17.7	3.63	0.27	0.32	0.27	0.41	0	0	0	0	24	0	0	4.85	4.71	16.22	4.61	0	0	2	0	0	9	8	7	1	0	9.5
477	36	38	0	0	21.6	0	1	0	0	0	10	7.1	3.89	20	157.14	0.725397	0.69	1.32	0.35	12	25.9	17.2	4	0.29	0.23	0.28	0.96	0	0	0	0	22	0	0	4.63	4.21	13.21	1.52	0	0	0	0	0	5	5	10	2	0	8.5
478	31	31	0	0	26.38	0	0	0	1	0	2	7.56	6.79	24	184.9	0.53	0.88	2.39	0.28	11.3	27	17.3	2.76	0.32	0.16	0.28	1.36	1	0	0	0	20	0	0	4.73	4.52	16.86	2.14	0	0	1	0	0	5	7	11	2	0	11
479	34	35	0	0	21.65	0	1	0	0	0	7	7.33	3.94	17	170.5	0.67	0.95	1.37	0.13	11.6	27.9	19	2.28	0.27	0.16	0.31	0.61	1	0	0	0	10	0	0	4.91	5.26	13.73	0.87	1	1	1	0	0	6	4	9	1	1	13
480	29	29	0	1	22.46	1	0	0	0	0	1	4.85	5.88	21	266.8	0.43	0.47	5.89	0.62	11	24.2	16.9	3.71	0.44	0.24	0.46	0.84	0	0	0	0	10	0	0	4.38	5.03	17.76	2.13	0	0	1	0	0	11	13	18	2	0	13.5
481	31	31	0	0	21.23	0	0	1	0	0	3	5.16	3.09	31	128.1	0.871096	0.36	1.59	0.15	11.4	27.6	18.8	2.08	0.23	0.19	0.26	1	2	0	0	0	6	0	0	4.61	5.09	16.43	1.12	0	0	1	0	0	3	3	5	1	0	10
482	33	37	0	0	25.56	0	1	0	0	0	1	4.62	3.91	22	58.78	1.37	0.43	4.47	0.19	10.5	22.2	19.4	2.33	0.25	0.15	0.33	0.93	1	0	0	0	22	0	0	5.19	4.28	17.9	1.32	0	0	0	0	0	13	12	4	1	1	10
483	30	29	0	0	24.92	1	0	0	0	0	3	3.64	6.67	23	264	0.51	0.56	7.32	0.13	10.6	24.7	17.9	2.32	0.28	0.18	0.33	0.74	0	0	0	0	8	0	0	4.55	4.96	16.21	2.99	0	0	0	0	0	13	14	5	1	0	13
484	36	37	0	0	22.24	1	1	0	0	0	6	5.36	3.15	19	135.2	1.43	0.27	1.32	0.51	11	30.2	17.5	2.5	0.5	0.24	0.24	1.04	0	0	0	0	10	0	0	4.85	4.61	15.31	2.09	0	0	0	0	0	5	7	3	1	0	10
485	38	37	0	0	23.38	0	1	0	0	0	7	5.79	5.13	14	90.4	0.49	0.38	1.4	0.2	11.7	21.5	17.9	2.08	0.26	0.16	0.28	0.44	0	0	0	0	5	0	0	4.83	4.25	16.08	3.03	0	0	2	0	0	5	4	14	1	0	11
486	29	26	0	0	18.52	1	0	0	0	0	2	4.7	2.55	24	112.9	1.73	1.1	2.71	0.15	11.3	22.7	18.1	2.58	0.22	0.18	0.28	0.31	1	0	0	0	9	0	0	4.12	4.73	18.29	3.58	0	0	0	0	0	11	7	16	2	0	9
487	34	33	0	0	22.46	0	0	0	0	0	1	7.99	4.13	20	134.9	0.693727	0.7	1.48	0.13	10.9	22.4	18.3	2.03	0.31	0.17	0.3	0.62	3	0	0	0	6	0	0	5.32	4.5	14.7	2.55	0	0	0	0	0	4	4	8	2	0	8.5
488	32	33	1	0	17.93	1	0	0	1	0	2	6.34	6.04	22	200.5	0.615659	0.59	2.11	0.14	11.7	26.9	18.1	2.12	0.3	0.18	0.34	0.89	1	0	0	0	12	0	0	5.54	4.28	13.25	2.02	1	1	1	0	0	5	5	14	2	1	10.32
489	30	30	0	0	21.45	1	1	0	0	0	5	6.33	4.56	14	88.6	0.672134	1.72	7.39	0.2	10.8	22.8	17.9	2.66	0.28	0.27	0.31	1.09	1	0	0	0	11	0	0	4.51	5.56	13.07	2.32	1	1	1	0	0	12	11	10	2	0	10
490	29	33	0	0	25.39	1	0	0	0	0	2	6.86	18.84	15	229	0.5	1.87	3.98	0.15	10	20.2	17.6	2.66	0.22	0.87	0.3	0.88	0	0	0	0	7	0	0	5.13	5.22	15.7	1.91	0	0	1	0	0	10	10	8	1	0	11
491	28	28	0	0	20.35	0	1	0	0	0	1	5.16	6.31	26	112	0.54	2.82	4.34	0.23	11.4	26.6	21	1.72	0.26	0.16	0.3	1.15	2	0	0	0	18	0	0	4.83	4.68	18.3	1.37	0	0	1	0	0	5	5	13	1	0	10
492	42	42	0	0	24.8	1	0	1	0	0	14	7.79	4.42	9	172.56	0.957012	3.04	0.18	0.15	10.9	21.2	17.7	3.69	0.26	0.18	0.29	0.53	0	0	0	0	17	0	0	4.95	4.62	14.97	2.06	0	0	0	0	0	3	0	16	2	0	9
493	34	31	0	0	25.97	0	0	1	0	0	4	5.79	2.5	14	204.2	1.1	0.9	0.78	0.2	11.1	23.9	19.2	2	0.25	0.23	0.33	1.01	2	0	0	0	5	0	0	5.32	5.4	14.59	1.44	0	1	1	0	0	1	3	12	2	0	9
494	38	41	0	0	24.37	0	0	0	0	0	4	6.46	3	19	220.9	0.81	1.16	1.33	0.16	11.6	26.1	17.8	2.72	0.26	0.22	0.39	0.91	1	0	0	0	11	0	0	4.96	4.62	15.04	1.76	1	1	1	0	0	4	0	9	1	0	9.5
495	27	28	0	0	25.93	1	0	0	0	0	3	5.04	5.09	18	218.1	0.75	0.48	2.63	1.28	12.1	26.3	17.9	3.11	0.23	0.18	0.28	1	2	0	0	0	25	0	0	4.51	3.7	15.65	1.57	0	1	0	0	0	8	10	10	1	0	9.5
496	31	35	0	0	20.66	1	0	0	0	0	5	8.41	5.3	42	94.1	1.14442	2.06	4.55	0.24	11.3	21.7	18.4	2.46	0.26	0.15	1.42	0.81	2	0	0	0	13	0	0	5.9	5.09	17.2	1.1	0	0	1	0	0	7	7	10	1	0	10
497	31	32	0	0	23.89	1	0	0	0	0	2	6.05	7.59	15	171.4	1.18	0.3	5.21	0.41	10.8	22.6	18.7	2.78	0.29	0.17	0.3	0.71	1	0	0	0	16	0	0	4.92	4.88	15.96	1.35	0	0	1	0	0	10	10	10	1	1	14
498	32	33	0	1	25.68	0	0	0	0	0	2	2.37	6.48	19	301.2	0.68	1.32	1.42	0.29	10.6	23.6	17.6	2.8	0.23	0.21	0.49	0.51	1	0	0	0	11	0	0	5.25	4.86	17.65	1.45	0	0	1	0	0	6	3	16	1	1	10
499	34	32	0	0	26.1	0	0	0	0	0	2	7.17	6.09	7	138.9	0.53	0.52	2.22	0.81	10.1	23.2	18.8	3.11	0.4	0.2	0.25	1.16	1	0	0	0	15	0	0	5.06	4.26	14.29	2.21	0	0	1	0	0	11	12	12	1	1	13
500	34	33	0	0	21.63	0	0	0	0	1	4	6.41	4.84	27	158.8	0.64	0.53	2.47	0.16	11	24	19	1.82	0.26	0.15	0.33	1.21	1	0	0	0	6	0	0	4.89	4.35	15.64	7.55	1	1	1	0	0	5	4	2	1	0	6
501	33	33	0	0	21.66	0	0	0	0	0	1	5.27	3.25	10	205.9	0.44	0.74	4.22	0.13	11.5	23.4	18	2.89	0.25	0.16	0.7	0.58	2	0	0	0	10	0	0	4.81	5.04	16.57	1.27	0	0	0	0	0	7	10	4	1	0	10
502	26	25	1	0	20.85	1	0	0	0	0	3	5.92	6.72	23	158.1	0.59276	0.28	6.11	0.14	11.57	26	18.05	2.4	0.25	0.15	0.52	0.77	0	0	0	0	10	0	0	4.42	5.82	20.78	2.14	0	0	1	0	0	10	13	21	1	0	11.07
503	35	37	0	0	24.95	1	0	1	1	0	7	10.03	7.22	19	127.2	0.94	0.49	6.64	1.23	10.5	23.5	18.2	3.19	0.25	0.2	0.26	1.03	2	0	0	0	8	0	0	5.54	4.8	17.16	1.04	0	0	1	0	0	8	9	3	1	0	9
504	32	30	0	0	20.6	1	0	0	0	1	4	5.34	5.01	16	125.1	0.530579	0.7	3.19	0.21	10.9	23.9	19.3	2.08	0.24	0.17	0.28	1.66	3	0	0	0	6	0	0	5.39	4.55	20.78	1.65	0	1	1	0	0	7	6	6	1	0	10
505	32	32	0	0	25.13	0	0	0	0	0	1	5.17	5.06	33	217.2	0.57	0.84	6.21	0.1	10.8	23.4	16.9	2.87	0.21	0.13	0.27	0.81	2	0	0	0	11	0	0	5.2	4.96	15.85	2.43	0	0	1	0	0	13	13	5	1	0	10
506	30	34	0	0	23.59	1	0	0	0	1	5	6.71	2.66	17	169.5	0.991051	0.36	2.78	0.28	12	28.77	17.55	2.91	0.26	0.38	0.32	0.87	2	0	0	0	10	0	0	4.4	4.74	17.14	1.67	0	1	1	0	0	6	8	14	1	1	11
507	31	32	0	0	22.53	1	0	0	0	0	3	4.89	13.17	13	225.6	0.59	0.59	20	0.05	10.9	21.8	17.9	2.61	0.25	0.14	0.28	1.31	2	0	0	0	10	0	0	3.6	5.72	19.1	2	0	0	1	0	0	10	15	15	1	0	9.5
508	39	34	0	0	22.75	1	0	0	0	1	4	8.43	6	24	155.9	0.37	0.44	2.69	0.18	10.5	23	17.3	3.73	0.25	0.15	0.3	0.97	0	0	0	0	17	0	0	5.38	5.49	13.32	4.36	1	1	1	0	0	4	5	11	1	0	11.5
509	33	33	0	0	20.47	0	0	0	0	1	2	7.84	4.21	20	178.9	0.9	0.8	3.61	0.18	11.1	24.9	18.2	2.17	0.24	0.14	0.32	0.22	0	0	0	0	4	0	0	4.77	5.34	18.06	1.2	1	1	1	0	0	5	15	9	1	0	8
510	35	34	0	0	21.49	1	0	0	0	0	3	6.68	4.16	22	177.2	0.56	0.54	3.12	0.29	11.1	25.2	18.8	1.93	0.26	0.15	0.34	0.68	0	0	0	0	18	0	0	5.15	4.83	17.07	1.33	0	0	1	0	0	4	7	15	1	0	10
511	44	47	0	0	20.46	0	0	1	0	0	3	8.92	5.48	10	104.6	0.656014	2.07	1.43	0.13	10.9	23.8	17.8	2.53	0.24	0.35	0.3	0.63	3	0	0	0	17	0	0	5.19	5.78	18.08	1.19	0	0	2	0	0	2	1	10	1	0	9
512	32	32	0	0	30.19	1	0	0	0	0	2	6.66	2.32	14	91	0.18	0.71	1.75	0.13	11	23.5	19.7	2.66	0.29	0.22	0.38	0.44	2	0	0	0	20	0	0	4.97	4.24	15.82	2.02	0	0	1	0	0	4	6	12	1	0	10
513	34	31	0	0	29.29	1	0	0	0	0	2	5.48	4.63	20	124.1	0.63	0.36	6.59	0.21	11	28.1	17.1	3.28	0.22	0.16	0.39	0.41	1	0	0	0	21	0	0	4.52	4.86	17.32	1.43	0	0	1	0	0	12	13	8	1	0	10
514	40	41	0	1	19.22	0	0	0	0	0	3	8.77	6.6	11	147.2	0.45	0.69	1.5	0.15	12	23.1	17.3	2.71	0.26	0.15	0.38	0.59	1	0	0	0	9	0	0	5.32	4.33	17.71	1.1	0	0	1	0	0	7	7	6	1	0	10
515	33	35	0	0	20.85	0	0	0	1	1	2	5.73	5.38	9	92.7	1.41	0.68	3.14	0.25	11.5	29	18.4	3.03	0.32	0.16	0.3	1.99	2	0	0	0	16	0	0	5.51	4.89	13.53	1.77	0	0	1	0	0	4	4	10	1	0	10
516	34	34	0	0	25.86	1	0	0	0	0	3	6.06	3.93	18	169.71	0.45	0.97	1	0.35	12.4	26.7	16.9	4.11	0.26	0.22	0.29	1.22	1	0	0	0	80	0	0	5.69	4.61	16.7	1.67	0	0	1	0	0	4	4	14	1	0	10
517	32	33	1	0	22.18	0	0	0	0	0	1	5.76	15.94	17	94.3	0.53456	0.77	7.78	0.2	11.41	25.68	18.08	2.26	0.23	0.25	0.27	0.87	2	0	0	0	2	0	0	4.65	4.94	16	2.48	0	0	1	0	0	15	18	13	1	0	10.41
518	32	30	0	0	28.14	1	0	1	0	0	2	5.88	13.51	9	152.87	0.717934	0.4	5.84	0.2	11.1	25.6	18.2	3.61	0.26	0.28	0.28	0.33	0	0	0	0	24	0	0	4.89	4.64	16.37	1.45	0	0	1	0	0	15	16	14	1	0	11
519	36	32	0	0	22.46	1	0	0	1	0	5	7.53	6.1	17	143.4	0.41	0.29	2.63	0.19	11.6	22.1	17.1	2.99	0.43	0.2	0.29	0.81	0	0	0	0	8	0	0	4.86	4.95	15.84	4.62	0	0	1	0	0	6	6	6	2	0	10.5
520	38	38	0	0	20.35	1	0	0	1	1	3	7.57	4.95	12	248.6	0.961638	1.24	1.71	0.14	11.1	21.9	17.9	2.4	0.22	0.17	0.29	0.28	1	0	0	0	5	0	0	5.57	4.96	16.38	2.02	0	0	0	0	0	6	4	11	2	0	12.5
521	30	30	0	0	27.88	1	0	0	0	0	3	4.88	4.09	30	151.8	0.99	0.9	3.66	0.15	10.5	22.8	17.2	3.28	0.24	0.35	0.31	0.66	0	0	0	0	26	0	0	5.26	4.54	17.33	2.81	0	0	1	0	0	5	8	15	2	0	11
522	36	38	0	0	25.12	0	0	1	0	1	3	7.12	4.08	16	160.1	1.74	0.57	3.32	0.23	11.2	23	18.3	2.72	0.38	0.18	0.36	0.46	1	0	0	0	12	0	0	3.94	4.7	16.19	3.74	0	0	0	0	0	4	7	8	1	0	10
523	40	32	0	0	28.47	1	0	0	0	0	5	6.73	4.68	37	143.4	0.81	0.19	2.36	0.37	10.7	21.1	18.4	4.18	0.23	0.14	0.71	0.82	3	0	0	0	28	0	0	6.09	5.21	19.11	2.53	1	0	1	0	0	14	10	12	2	0	8.5
524	30	30	0	0	21.66	1	0	0	1	1	4	6.02	2.06	17	146.71	1.2	0.62	1.9	0.07	14.87	28.44	12.15	2.66	0.27	0.07	0.37	1.08	1	0	0	0	8	0	0	4.42	5.11	19.82	2.4	1	0	0	0	0	8	5	17	2	0	13.5
525	31	33	0	0	18.74	1	0	0	0	1	2	5.86	3.73	25	154.9	0.98	0.54	4.75	0.16	11.4	25.8	19.7	2.43	0.26	0.26	0.32	0.25	0	0	0	0	6	0	0	4.75	4.61	15.66	3.12	0	1	1	0	0	7	0	19	2	0	9.5
526	28	29	1	0	17.84	1	1	0	0	0	3	7.24	4.6	22	134	0.557912	0.64	2.04	0.18	11.69	26.93	17.63	2.21	0.26	0.2	0.29	1.11	1	0	0	0	0	0	0	4.25	4.39	15.87	1.51	0	0	1	0	0	4	4	3	2	0	10.53
527	25	30	0	0	23.98	1	1	0	0	0	4	5.67	3.54	16	261.9	0.33	0.6	4.43	0.26	11.7	29.5	16.7	3.22	0.99	0.61	0.39	1.19	1	0	0	0	20	0	0	5.07	4.51	16.23	2.17	0	0	0	0	0	4	9	6	2	0	11
528	30	28	1	0	23.89	1	1	1	0	0	3	4.95	8.82	20	223.1	0.87	0.83	7.67	0.16	11.32	24.92	18.29	2.66	0.29	0.15	0.3	0.86	0	0	0	0	20	0	0	5.77	5.04	17.45	1.46	0	0	1	0	0	16	19	11	1	0	11.11
529	29	30	0	0	19.15	1	1	0	0	1	2	8.51	6.29	20	97.9	0.838658	1	5.29	0.14	11.9	25.7	17.7	2.53	0.25	0.16	0.45	1.19	3	0	0	0	14	0	0	4.91	5.24	16.17	2.33	0	0	1	0	0	6	6	4	1	0	10
530	32	32	0	0	26.6	0	0	0	0	0	1	2.11	3.02	14	224.9	1.42	0.64	0.94	0.22	10.7	23.6	17.8	2.54	0.29	0.15	0.31	0.33	0	0	0	0	13	0	0	5.11	5.12	16.21	2.03	0	0	0	0	0	3	4	5	2	0	10
531	34	38	0	0	28.66	0	0	1	0	0	1	6.16	9.52	20	107.6	0.22	0.14	7.19	0.21	10.4	21.6	18.7	2.85	0.3	0.15	0.41	0.37	1	0	0	0	32	0	0	4.9	4.91	18.63	0.65	0	0	1	0	0	7	13	5	1	1	10
532	31	29	0	0	21.63	1	1	0	0	0	4	6.5	6.65	24	107.9	0.81185	0.49	2.63	0.28	11.6	28.7	17.3	3.11	0.28	0.23	0.34	1.87	2	0	0	0	12	0	0	5.29	5.57	16.33	2.73	0	0	1	0	0	6	7	5	1	0	9.5
533	32	32	0	1	20.95	1	1	0	0	0	4	8.65	4.63	17	95.7	1.31	0.72	1.42	0.4	10.9	25.1	17.2	3.05	0.29	0.22	0.29	0.88	1	0	0	0	8	0	0	4.21	4.7	15.39	2.74	0	0	0	0	0	3	4	15	2	0	10
534	24	27	0	1	20.43	0	0	0	0	0	6	4.9	6.25	23	67.43	0.521827	0.66	1.64	0.27	11.5	27.8	18.3	2.16	0.28	0.23	0.31	0.61	1	0	0	0	4	0	0	4.62	4.13	15.08	3	0	0	1	0	0	12	9	19	2	0	12
535	29	30	0	0	21.49	1	1	0	0	0	2	6.45	6.19	19	158.2	0.694489	0.3	3.48	0.14	11.5	27.9	17.4	2.62	0.28	0.34	0.79	1.09	1	0	0	0	8	0	0	4.82	3.84	16.23	2.3	1	1	0	0	0	8	10	11	1	0	10
536	36	34	0	0	24.76	0	1	0	1	0	3	6.28	6.09	25	86.88	1.36	0.51	2.73	0.28	10.4	21.1	19.9	2.1	0.23	0.31	0.26	1.43	1	0	0	0	5	0	0	5.18	5.3	12.99	0.78	0	0	1	0	0	6	9	11	1	0	10.5
537	33	34	0	1	18.67	1	1	1	0	0	5	4.19	7.26	11	187	0.35	1.49	1.52	0.15	12.1	25	18.7	2.3	0.26	0.32	0.32	0.62	0	0	0	0	25	0	0	4.91	4.51	18.37	1.73	1	0	1	0	0	2	3	13	2	0	11
538	28	30	0	0	25.19	0	0	0	0	1	3	6.44	9.12	9	190.5	0.76	0.28	6.01	0.23	10.6	20.6	20.1	3.24	0.26	0.21	0.42	0.22	3	0	0	0	8	0	0	7.4	4.87	15.07	1.65	0	0	1	0	0	10	12	10	1	0	10
539	28	27	0	0	23.09	0	1	0	0	0	2	9.73	4.43	30	399.4	0.991298	0.44	2.97	0.15	11.5	23.9	16.7	3.05	0.25	0.22	0.32	0.42	3	0	0	0	8	0	0	5.52	4.6	13.87	3.99	0	0	1	0	0	7	1	4	2	0	10
540	32	31	0	0	22.12	1	1	0	0	0	2	7.55	4.63	23	91	0.869759	0.32	0.92	0.15	10.8	25.9	18.3	2.03	0.27	0.31	0.24	0.53	3	0	0	0	4	0	0	5.33	4.91	17.64	4.16	0	1	1	0	0	3	2	10	1	0	8.5
541	29	29	0	1	21.24	0	1	0	0	0	2	7.29	3.51	22	310.5	0.52	3.24	2.24	0.15	10.4	22.6	18.5	2.4	0.27	0.16	0.26	1.18	2	0	0	0	5	0	0	4.74	5.52	16.74	2.02	1	1	1	0	0	3	5	12	2	0	11
542	35	37	0	0	19.58	1	0	0	0	0	9	6.42	3.66	14	128.3	0.29	0.25	1.32	0.14	11.5	25.1	18.8	2.1	0.23	0.2	0.28	0.72	1	0	0	0	9	0	0	4.86	3.73	16.06	1.63	0	0	1	0	0	2	4	2	2	0	10
543	36	39	0	0	30.42	1	1	0	0	0	13	7.63	4.35	20	89	0.67	0.53	0.98	0.17	11.1	21.5	17.6	3.28	0.31	0.22	0.36	0.28	0	0	0	0	10	0	0	4.94	4.33	17.63	1.81	1	1	0	0	0	2	1	19	1	0	11
544	31	31	0	0	21.24	1	0	0	0	0	3	6.93	6.52	9	115.7	2.15	2.12	6.92	0.2	11	26	18.3	2.54	0.48	0.21	0.3	0.21	2	0	0	0	5	0	0	4.41	5.35	17.12	3.61	0	0	1	0	0	8	7	14	1	0	13
545	33	34	0	0	25.5	1	1	0	0	0	10	6.36	14.01	23	132	0.710692	0.76	3.52	0.25	10.8	21.6	18.3	2.84	0.23	0.23	0.23	0.59	0	0	0	0	20	0	0	5.58	5.08	17.86	1.81	0	0	0	0	0	6	7	4	1	0	13
546	36	31	0	1	27.88	1	0	0	0	0	3	8.54	4.89	27	72.48	1.07	0.26	12.11	0.13	10.9	23.1	18.9	2.75	0.29	1.17	0.32	1.07	2	0	0	0	18	0	0	6.85	5.22	16.64	3.84	0	0	1	0	0	5	12	11	1	0	10
547	29	33	1	0	25.39	1	0	0	0	0	5	5.43	8.49	16	171	1	0.27	7.79	0.27	11.33	24.21	18.09	3.38	0.25	0.21	0.32	1.52	2	0	0	0	45	0	0	4.61	5.44	18.93	2.93	0	0	1	0	0	18	15	10	1	0	11.32
548	33	32	0	0	23.68	0	0	0	0	1	5	5.96	4.9	25	155.8	0.70848	0.19	3.02	0.18	13.1	26.5	18.1	2.87	0.32	0.24	0.24	1.57	1	0	0	0	10	0	0	4.83	4.86	11.75	1.7	0	0	1	0	0	8	3	10	2	0	10
549	34	28	0	0	24.24	1	0	0	0	1	3	6.08	3.43	19	226.7	0.484166	0.38	1.34	0.28	11.1	20.6	17.2	2.62	0.27	0.16	0.32	1.05	0	0	0	0	17	1	0	4.82	4.06	13.91	3.33	0	0	1	0	0	3	6	10	2	0	11
550	33	33	0	0	25.54	1	1	0	0	1	3	20.43	8.4	21	225.9	0.44	0.38	0.4	0.26	11.3	26.6	17.6	3.14	0.37	0.26	0.34	0.75	1	0	0	0	9	0	0	5.14	4.66	16.47	1.73	0	0	2	0	0	0	2	11	2	0	10
551	34	33	0	0	20.73	1	0	0	1	0	7	8.31	5.03	33	113	0.54	0.42	0.84	0.15	11.7	24.7	18	2.58	0.37	0.25	0.28	0.32	1	0	0	0	3	0	0	4.53	4.69	17.22	3.81	0	0	1	0	0	2	2	2	2	0	11.5
552	28	28	0	0	24.37	1	0	0	0	0	3	7.3	7.72	22	161.09	0.65	0.81	4.14	0.15	11	28.2	17.9	2.36	0.24	0.16	0.31	0.49	0	0	0	0	6	0	0	4.74	3.75	17.07	1.85	0	0	0	0	0	7	8	9	2	0	11
553	26	26	0	0	22.19	0	0	0	0	0	1	8.17	3.38	25	97.5	0.65	0.56	4.57	0.37	11.3	32.4	15.1	2.27	0.25	0.6	0.3	1.17	1	0	0	0	12	0	0	4.9	4.62	1.24	1.33	0	0	0	0	0	10	8	9	2	0	11
554	35	38	0	1	21.13	1	0	0	1	0	8	4.8	3.04	11	110.6	0.43	0.68	1.79	0.25	11.1	28.1	18.8	1.98	0.26	0.25	0.31	0.97	2	0	0	0	20	0	0	5.25	5.03	16.16	1.5	0	0	1	0	0	4	3	11	1	0	13
555	33	35	0	0	19.02	1	0	0	0	0	2	4.13	2.97	27	137.1	0.97	1.21	3.6	0.2	10.7	23.7	19.5	2	0.26	0.17	0.4	1.23	1	0	0	0	6	0	0	4.68	5.12	15.75	3.03	0	0	2	0	0	7	8	9	1	0	8
556	38	39	0	1	24.59	1	1	0	1	1	13	7.29	8.48	17	242.6	1	0.29	3.52	0.16	10.2	22.4	18.6	2.46	0.39	0.23	0.36	0.76	0	0	0	0	16	0	0	5.22	4.4	12.6	0.13	0	1	1	0	0	5	6	12	1	0	11
557	30	32	0	0	19.68	0	1	0	0	0	1	4.93	6.07	18	78.72	0.9	0.45	1.72	0.34	12	32	17.4	2	0.28	0.62	0.32	0.53	0	0	0	0	3	0	0	4.27	4.46	13.67	2.57	0	0	1	0	0	5	5	9	1	0	9
558	33	34	1	0	21.82	1	1	0	0	0	4	7.11	5.71	19	168.77	0.421559	0.93	4.79	0.21	11.28	25.01	17.62	2.57	0.29	0.25	0.33	0.34	2	0	0	0	7	0	0	4.57	3.85	14.34	3.5	0	1	1	0	0	9	12	2	1	1	10.41
559	30	29	0	1	22.98	1	0	0	0	0	4	9.75	8.38	25	212	0.73	1.56	4.53	0.18	10.4	21.9	18	2.91	0.27	0.15	0.61	0.81	0	0	0	0	19	0	0	5.29	4.57	14.42	3.87	1	1	1	0	0	5	9	8	1	0	12.5
560	29	33	0	0	22.73	0	1	0	0	1	6	6.27	3.64	13	127	0.75141	0.76	2.78	0.18	11.6	28.1	18.9	2.17	0.23	0.17	0.25	0.72	1	0	0	0	6	0	0	4.04	5.11	17.48	1.33	0	0	1	0	0	7	7	13	1	0	13
561	25	29	0	0	25.54	1	0	0	0	0	3	6.57	5.02	110	166.74	0.85	0.12	2.94	0.3	10.9	23.5	15.8	3.05	0.33	0.17	0.35	0.53	3	0	0	0	9	0	0	4.79	5.39	16.84	3.2	0	0	1	0	0	7	6	7	1	0	12
562	32	33	1	1	26.71	1	0	0	0	1	4	5.1	7.31	15	637.8	1.0004	1.31	5.44	0.23	11.18	25.39	17.52	2.82	0.29	0.21	0.32	1.23	1	0	0	0	9	0	0	4.15	4.31	12.37	2.68	1	0	1	0	0	12	14	8	1	0	10.71
563	34	38	0	1	24.9	1	0	0	0	0	7	10.93	5.37	18	187.4	0.828189	0.43	0.63	0.16	10.6	22.9	18.3	2.62	0.26	0.25	0.3	1.3	1	0	0	0	32	0	0	4.64	5.14	16.17	1.02	1	1	1	0	0	2	3	13	1	0	10
564	31	32	0	0	22.56	0	0	0	0	1	2	4.9	3.78	8	141.1	0.65	0.63	2.52	0.24	10	23.9	18.5	3.16	0.23	0.23	0.24	0.41	2	0	0	0	12	0	0	6.76	4.28	13.66	2.05	1	1	1	0	0	3	6	20	1	0	12
565	37	37	0	0	22.91	0	1	0	0	1	2	5.65	5.17	9	147.9	0.69	0.32	3.79	0.18	10	22.8	18.4	2.3	0.26	0.15	0.22	0.78	0	0	0	0	16	0	0	5.07	3.77	16.99	3.47	0	0	1	0	0	7	9	7	1	0	8
566	37	37	0	0	19.72	0	0	0	0	0	2	6.44	5.91	20	83.25	0.755855	1.57	2.04	0.17	11.3	23.8	18.8	1.87	0.27	0.17	0.25	1.95	1	1	0	0	5	0	0	4.88	4.56	16.48	2.5	0	0	1	0	0	8	7	14	1	0	8.5
567	33	31	0	0	25.13	1	0	1	0	0	2	6.01	22.85	12	137.6	2.02	0.12	4.36	0.24	10.3	22.4	18.1	3.38	0.26	0.98	0.25	0.82	2	0	0	0	22	0	0	5.23	4.97	16.08	1.58	0	0	1	0	0	10	16	6	1	0	10
568	32	32	0	0	23.2	1	0	0	0	0	5	6.39	6.28	20	321.6	0.558138	0.31	2.79	0.16	11.8	24.6	18.2	2.66	0.26	0.18	0.26	0.91	0	0	0	0	8	0	0	4.8	4.61	13.17	1.72	1	0	1	0	0	5	7	18	1	0	10
569	33	34	0	1	26.18	1	1	0	1	0	1	8.19	5.87	21	174.5	0.834605	0.45	1.74	0.32	11	24.8	17.9	2.73	0.32	0.31	0.25	0.42	2	0	0	0	20	0	0	5.71	4.34	14.4	1.62	1	0	0	0	0	3	6	7	1	0	9
570	27	29	0	0	25.54	0	1	0	0	0	3	6.57	5.47	21	124.5	0.44	0.15	2.27	0.19	10.4	20.9	18.1	2.94	0.27	0.17	0.27	0.87	1	0	0	0	34	0	0	4.85	4.93	17.27	2.13	0	0	1	0	0	7	4	6	1	0	11
571	37	43	1	0	23.66	1	1	0	0	0	3	7.69	5.09	17	331.9	0.34	0.89	2.29	0.12	11.6	24.5	17.9	2.82	0.25	0.16	0.32	1.13	1	0	0	0	11	0	0	5	4.51	17.28	0.95	0	0	1	0	0	5	6	7	1	0	9.94
572	28	25	0	0	18.57	1	1	0	0	0	1	1.91	2.1	19	160.76	0.615816	0.88	2.13	0.15	12.1	27.4	18.1	2.46	0.26	0.22	0.36	0.44	1	0	0	0	9	0	0	4.44	5.84	14.08	1.19	0	0	1	0	0	6	9	9	1	0	12.5
573	36	36	0	0	19.77	1	0	0	1	0	2	7.82	4.2	11	265.9	0.69	1.56	2.21	0.25	11.4	23.1	17.7	2.37	0.24	0.23	0.26	0.52	2	0	0	0	23	0	0	4.72	3.79	13.89	1.26	0	0	1	0	0	6	8	18	2	0	14
574	32	32	0	0	22.64	0	0	0	0	0	2	5.97	5.05	9	158.4	0.631606	0.51	3.12	0.15	11.2	24.5	18.2	1.98	0.3	0.16	0.25	1.03	3	0	0	0	7	0	0	5.28	5.05	14.3	2.15	0	0	1	0	0	14	8	17	2	0	9
575	27	29	0	0	24.56	1	1	0	0	0	4	4.82	5.19	28	218.5	0.821716	0.13	7.5	0.17	11.6	29.6	17.8	3	0.43	0.16	0.33	0.21	1	0	0	0	15	0	0	5.15	4.73	17.06	3.8	1	1	1	0	0	10	15	7	2	0	16
576	31	28	0	1	21.02	0	0	0	0	0	3	4.63	6.25	22	112.8	0.45	0.51	4.79	0.16	11.4	22.9	18.4	2.89	0.22	0.23	0.32	0.34	0	0	0	0	12	0	0	4.86	5.43	16.76	1.21	1	1	1	0	0	10	13	8	1	1	13
577	36	31	0	0	22.81	0	1	0	0	0	3	6.34	3.92	22	206.6	0.844394	0.12	1.82	0.14	11.4	26.5	18.1	2.65	0.24	0.28	0.23	1.59	1	0	0	0	8	0	0	4.86	4.58	18.39	2.15	1	1	1	0	0	5	6	11	1	0	14
578	32	33	0	1	20.96	0	0	0	0	0	8	5.3	3.6	58	176.2	0.49	0.49	6.4	0.23	10.6	22.1	17.7	2.71	0.26	0.17	0.23	0.49	1	0	0	0	8	0	0	5.45	4.37	13.68	1.96	0	0	1	0	0	6	8	10	1	0	9
579	36	49	0	0	23	0	1	0	0	0	1	6.94	3.41	10	168.2	0.71	0.36	2.47	0.15	10.8	25.5	19.5	2.17	0.27	0.18	0.26	0.76	0	0	0	0	10	0	0	5.02	5.07	14.7	4.46	0	0	1	0	0	4	2	9	1	0	8
580	34	36	0	0	23.18	1	1	0	0	0	3	5.51	7.22	15	155.85	0.71143	0.54	3.79	0.16	11	22.9	18.2	2.94	0.26	0.18	0.26	0.27	1	0	0	0	28	0	0	4.98	4.29	15.99	3.95	0	0	1	0	0	5	8	10	1	0	10
581	27	31	0	0	24.8	1	0	1	1	0	2	7.62	2.43	13	114.5	1.21	0.54	1.5	0.15	11.6	25.9	18.5	2.29	0.31	0.16	0.24	1.29	2	0	0	0	9	0	0	5.33	4.8	11.96	1.22	0	0	1	0	0	11	1	12	1	0	9.5
582	37	38	0	0	21.41	0	0	0	0	0	2	8.89	3.05	21	144.73	0.885939	0.77	1.27	0.55	10.9	25.4	18.5	2.77	0.27	0.17	0.32	1.16	2	0	0	0	13	0	0	5.1	4.42	17.1	2.7	0	0	1	0	0	3	6	13	1	0	11
583	31	30	0	0	22.83	1	0	0	0	0	3	6.09	5.11	18	85.96	0.659593	1.77	0.53	0.19	11.2	34.4	18.9	1.95	0.26	0.16	0.25	0.65	1	0	0	0	7	0	0	4.33	4.52	14.46	1.25	0	0	2	1	0	4	5	6	2	0	10
584	29	27	0	0	23.81	1	0	0	1	0	4	7.87	4.67	22	161.7	2.61	0.18	1.67	0.17	11.6	26.2	17	2.5	0.24	0.16	0.23	1.25	0	0	0	0	1	0	0	4.68	5.74	17.06	1	0	0	1	0	0	3	5	2	1	0	11
585	35	36	0	0	23.88	0	1	0	1	0	3	7.75	3.48	15	111.2	0.55	0.66	4.77	0.67	11.3	20.1	18.7	2.49	0.25	0.16	0.23	0.42	0	0	0	0	49	0	0	5.08	5.22	14.7	3.18	0	0	1	0	0	7	7	5	1	0	9
586	38	37	0	0	25.74	0	0	0	1	1	10	7.72	5.22	24	182.7	1.53	0.17	2.82	0.22	10	20.6	17.5	2.87	0.23	0.18	0.28	0.37	0	0	0	0	22	0	0	5.18	5.6	16.13	2.76	0	1	1	0	0	6	4	12	1	0	12
587	35	35	1	0	26.59	0	1	0	0	0	10	7.77	3.46	20	291.8	1.12	0.5	1.78	0.24	11.8	25.2	18.1	2.75	0.27	0.16	0.32	1.06	0	0	0	0	10	0	0	4.68	5.22	14.28	2.34	0	1	1	0	0	3	4	3	2	0	9
588	28	27	1	0	21.45	1	1	0	0	0	2	7.3	5.47	12	132.7	1.32243	0.61	2.19	0.22	11.9	23.2	18.4	1.67	0.25	0.16	0.42	1.01	3	0	0	0	3	0	0	4.76	5.12	15.84	1.05	0	0	1	0	0	6	8	6	1	0	10
589	29	29	1	0	22.53	0	1	0	1	0	2	4.83	7.7	8	162.05	1.48	0.66	1.14	0.15	11.9	31.4	19	2.25	0.28	0.16	0.33	0.34	1	0	0	0	5	0	0	4.81	4.55	16.52	1.94	0	0	1	0	0	4	6	4	1	0	9.5
590	29	34	1	0	24.03	1	1	0	0	0	7	6.08	6.16	24	96	0.565066	0.68	3.6	0.09	11.01	23.87	18.46	2.82	0.27	0.19	0.29	0.77	0	0	0	0	15	0	0	6.43	4.36	22.2	0.72	1	0	1	0	0	3	11	11	1	0	10.65
591	32	29	1	0	24.29	0	0	0	0	0	1	7.61	2.51	13	100.1	2.1	0.68	1.39	0.16	11.2	28	18.6	2.43	0.29	0.22	0.24	0.78	2	0	0	0	7	0	0	4.78	5.26	18	1.56	0	0	1	0	0	4	3	9	1	0	12.5
592	32	31	1	0	22.18	1	0	0	0	0	4	6.4	5.92	21	177.1	0.779606	0.78	1.78	0.21	11.33	24.87	18.15	2.57	0.27	0.15	0.42	0.78	0	0	0	0	9	0	0	5.01	4.01	17.68	3.22	0	1	1	0	0	9	8	4	2	0	10.54
593	37	40	1	1	24.93	0	0	0	0	1	4	7.64	5.29	22	132.3	0.37	0.58	3.73	0.32	10.9	22.8	17.5	3.45	0.28	0.24	0.28	0.45	1	0	0	0	7	0	0	4.98	4.3	11.53	3.32	0	0	0	0	0	4	4	12	1	0	8.5
594	36	34	1	0	21.64	1	1	0	0	0	1	7.19	3.83	37	95.2	0.891515	0.61	1.55	0.16	10.8	21	17.3	3.22	0.24	0.15	0.32	2.53	1	0	0	0	5	0	0	5.06	5.32	16.17	5.18	0	0	1	0	0	4	2	3	2	0	8
595	32	32	1	0	21.95	1	1	1	1	0	4	9.08	5.66	23	166.5	1.47	0.56	0.84	0.36	10.2	20.3	17.5	4.12	0.26	0.22	0.32	0.96	3	0	0	0	23	0	0	5.57	4.39	17.76	5.15	0	0	1	0	0	0	2	2	1	0	11
596	42	49	1	0	23.52	0	1	0	0	1	5	6.63	3.26	14	134.8	0.80392	2.53	0.98	0.2	11.6	24	17.7	2.71	0.26	0.14	0.35	0.2	2	0	0	0	7	0	0	4.5	5.01	13.77	2.47	0	0	1	0	0	1	5	9	2	0	10
597	31	39	1	0	19.64	0	0	1	0	0	1	11.04	3.76	19	148.5	0.530605	0.27	0.81	0.16	11.7	28.4	18.6	1.89	0.27	0.17	0.26	0.43	3	0	0	0	9	0	0	5.07	4.43	12.68	2.42	1	1	1	0	0	2	3	17	1	0	10
598	32	33	1	0	17.78	1	1	0	0	0	6	10.27	7.24	24	293.7	1	0.81	0.79	0.15	10.9	24.1	17.8	2.05	0.27	0.42	0.3	0.32	1	0	0	0	4	0	0	4.81	5.3	16.97	3.65	0	1	0	0	0	3	3	16	2	0	9
599	33	33	1	0	22.73	1	0	0	0	0	6	5.46	6.21	20	200.9	0.16	0.4	4.31	0.4	11.6	20.4	17.8	3.16	0.25	0.15	0.23	1.51	1	0	0	0	5	0	0	4.9	4.51	18.23	2.12	0	0	1	0	0	11	9	10	2	0	12
600	35	36	1	1	22.22	0	0	0	0	0	1	4.85	4.18	11	105.7	0.81	4.68	1.66	0.25	10.9	21.6	17.6	2.46	0.31	0.17	0.32	1.92	2	0	0	0	10	0	0	5.08	4.63	17.29	0.98	1	1	1	0	0	7	10	8	1	0	11
601	32	41	1	0	24.56	1	0	0	0	0	4	4.95	3.74	21	123.9	0.635606	0.94	1.67	0.09	10.9	22.1	17.1	2.72	0.28	0.18	0.27	0.26	1	0	0	0	8	0	0	5.75	4.97	17.22	1	0	1	0	0	0	4	2	6	1	0	9.88
602	32	32	0	0	22.18	1	1	0	0	0	2	7.05	8.33	19	606.4	1.61	0.71	1.24	0.15	12.1	26.3	18.9	1.84	0.28	0.27	0.39	0.76	0	0	0	0	5	0	0	4.22	5.97	16.25	1.71	1	0	1	0	0	3	3	9	2	0	11
603	37	32	0	0	24.89	1	1	0	1	0	4	5.92	4.35	24	83.31	1.58	1.69	5.49	0.45	11.5	21.4	18	2.62	0.28	0.15	0.34	0.31	1	0	0	0	11	0	0	4.78	4.91	15.36	2.38	0	0	0	0	0	10	7	4	1	0	12
604	32	35	0	0	19.96	0	0	0	0	0	1	6.21	3.91	23	75.53	0.87	0.48	3.37	0.16	11	20.5	17.4	2.94	0.25	0.85	0.3	0.96	2	0	0	0	11	0	0	5.53	4.75	18.58	0.55	0	0	1	0	0	3	6	7	1	0	11
605	28	32	0	0	32.92	0	1	1	1	1	2	8.23	3.44	7	169.3	0.72	0.19	0.34	0.16	10.2	23.7	17.3	3.63	0.35	0.27	0.35	0.31	0	0	0	0	25	0	0	4.52	4.39	15.81	2.16	0	1	1	0	0	2	6	7	1	0	7
606	32	35	0	0	22.99	1	1	1	0	0	3	5.63	4.95	20	162.7	0.4	0.64	6.03	0.15	11.2	23.7	17.5	3.41	0.92	0.28	0.41	0.73	2	0	0	0	22	0	0	4.69	5.41	17.31	2.54	0	1	1	0	0	12	11	15	2	0	14
607	34	36	0	0	25.15	0	0	0	0	1	1	9.1	6.83	20	171.4	1.23366	0.52	1.17	0.26	11.5	23.4	18.1	2.94	0.35	0.19	0.36	0.36	0	0	0	0	17	0	0	5.59	4.7	17.34	0.87	0	0	1	0	0	3	3	12	1	0	13
608	26	28	0	0	21.45	1	0	1	0	0	3	7.18	10.94	23	207.4	0.904982	3.44	16.65	0.15	11.4	21.6	16.8	4.16	0.27	0.17	0.3	0.54	0	0	0	0	13	0	0	4.5	4.88	16.31	2.94	1	1	1	0	0	19	19	9	1	0	10
609	37	36	0	0	22.74	0	0	0	0	0	3	10.93	2.41	28	177.9	1.29	0.45	3.32	0.16	11.3	24.7	17	3.05	0.27	0.15	0.33	0.3	0	0	0	0	17	0	0	4.47	4.59	15.28	3.32	0	0	0	0	0	5	8	13	2	0	8.5
610	33	31	0	0	23.39	1	1	0	0	0	2	4.53	4.5	17	152.2	0.57	0.73	2.41	0.15	11	22.5	17.6	3.35	0.25	0.16	0.39	0.3	1	0	0	0	24	0	0	4.59	4.7	13.36	1.92	0	0	1	0	0	5	6	10	1	0	11
611	29	30	0	1	21.63	1	1	0	0	0	5	6.28	3.36	64	128.67	1.04	2.32	3.13	0.45	12	25.9	17.3	2.71	0.27	0.17	0.27	0.3	3	0	0	0	6	0	0	4.84	5.11	14.29	2.19	0	1	1	0	0	4	3	8	1	0	10
612	35	33	1	0	17.09	1	1	0	0	0	10	5.13	48.29	14	341	1.08	0.96	2.07	0.07	11.84	26.85	18.61	2.11	0.35	0.26	0.33	1.01	2	0	0	0	7	0	0	4.89	5.08	16.2	2.09	0	0	1	0	0	8	8	13	2	0	11.27
613	33	37	0	0	26.5	1	0	0	0	0	2	7.43	7.83	18	100.1	0.82	0.46	1.18	0.14	11.5	22.3	17.8	2.36	0.31	0.17	0.31	0.31	0	0	0	0	12	0	0	5.51	5.2	15.98	3.75	0	0	0	0	0	7	7	9	1	0	10
614	27	29	0	0	21.11	1	1	0	0	0	2	4.17	1.72	25	148.4	1.44	0.47	1.88	0.16	11.4	25.2	20	1.49	0.25	0.16	0.3	0.3	0	0	0	0	10	0	0	5.25	5.08	16.2	2.35	0	0	2	0	0	7	4	2	1	0	13
615	30	39	1	1	28.16	0	0	1	0	1	2	4.85	4.75	8	102.8	0.97	0.39	6.81	0.2	11.8	29.4	17.4	3.3	0.24	0.16	0.3	0.92	0	0	0	0	24	0	0	5.63	4.7	18.2	2.21	0	0	0	0	0	10	15	7	1	0	10.61
616	40	39	0	0	26.52	0	0	0	1	1	4	6.89	4.6	19	193.9	1.13	0.58	1.65	0.25	9.5	20.1	20.3	2.13	0.28	0.14	0.35	0.35	0	0	0	0	5	0	0	5.02	5.27	19.49	1.07	0	0	1	0	0	5	4	13	1	0	10
617	32	31	0	1	23.78	0	1	0	0	0	1	5.05	11.02	6	168.6	0.791559	0.58	7.81	0.24	11.3	25.3	18.7	2.95	0.28	0.26	0.32	0.73	1	0	0	0	8	0	0	5.82	4.21	16.19	3.95	0	0	1	0	0	20	17	6	1	1	9
618	35	37	0	0	25.86	0	0	0	0	1	2	8.47	6.94	13	131.7	0.707885	0.62	2.66	0.4	11.3	20.9	18.9	2.94	0.53	0.21	0.33	1.43	3	0	0	0	14	0	0	4.42	4.75	16.68	1.61	0	0	1	0	0	4	4	3	1	0	10
619	32	32	0	1	22.81	0	0	0	0	0	3	5.59	3.18	17	216.7	0.51	1.01	5.3	0.23	10.8	21.2	19.5	2.02	0.29	0.16	0.38	1.5	1	0	0	0	4	0	0	4.38	4.35	17.48	1.47	1	1	1	0	0	8	9	11	2	0	10
620	29	28	1	0	20.35	0	1	0	0	0	5	3.09	7.27	21	101.8	0.37	0.76	4.47	0.22	11.58	26.32	17.75	2.46	0.29	0.26	0.32	0.61	3	0	0	0	11	0	0	4.72	4.89	14.48	1.52	1	1	1	0	0	11	10	8	2	0	11.17
621	33	34	1	0	20.85	0	1	0	0	0	1	7.2	5.02	24	111	1.01	0.88	3.36	0.2	11.2	24.05	18.34	2.49	0.29	0.24	0.37	0.98	3	0	0	0	12	0	0	6.09	4	17.4	3.17	1	1	1	0	0	6	7	11	1	0	10.07
622	24	26	0	0	21.11	1	1	0	1	1	5	6.44	4.67	19	148.67	0.23	1.41	1.78	0.15	11.9	25.5	18.4	2.29	0.3	0.19	0.32	2.15	1	0	0	0	5	0	0	4.79	4.99	17.99	2.53	1	1	1	0	0	7	7	5	2	0	10
623	35	28	0	0	19.86	0	1	0	0	0	1	10.49	4.37	46	173.3	0.988717	0.49	1.78	0.11	11.7	27.5	18.5	1.97	0.29	0.15	0.23	1.02	1	0	0	0	12	0	0	5.04	4.86	15.69	3.04	0	1	1	0	0	2	3	4	2	0	10
624	33	34	0	0	22.73	0	0	0	0	0	8	6.97	9.7	13	100.3	1.31	0.65	1.72	0.18	10.6	22.2	18	2.77	0.25	0.28	0.52	1.11	2	0	0	0	4	0	0	5.41	5.5	14.78	1.1	1	1	0	0	0	4	6	13	1	0	10
625	31	33	0	0	21.38	0	0	0	0	1	2	7.01	4.74	26	129.8	1.2	1.13	2.93	0.25	13	23.2	18.3	2.95	0.27	0.21	0.42	0.3	0	0	0	0	16	0	0	5	5.23	16.95	2.36	0	0	1	0	0	3	6	2	1	0	11
626	29	27	1	0	25.86	1	0	1	0	0	3	6.44	9.26	15	136.7	0.381439	0.21	7.12	0.2	11.31	24.71	17.79	3.04	0.24	0.16	0.4	0.62	0	0	0	0	24	0	0	4.7	4.98	15.84	2.43	0	0	1	0	0	19	12	7	1	0	11.29
627	32	33	0	0	23.53	0	0	0	1	0	7	5.37	5.31	15	98.8	1.66578	1.76	2.26	0.15	13.1	30.6	17.1	3.1	0.29	0.18	0.32	0.35	1	0	0	0	27	0	0	5.13	5.2	17.35	1.39	0	0	1	0	0	20	20	13	1	0	10
628	25	28	0	0	22.18	1	0	0	0	0	4	4.45	2.84	25	122.6	0.24	0.96	4.86	0.16	11.2	22.3	18.5	2.09	0.28	0.16	0.35	1.07	0	0	0	0	6	0	0	4.47	6.03	17.62	1.44	0	1	1	0	0	12	11	10	1	0	10
629	32	33	0	0	18.32	0	0	0	0	0	2	6.8	4.59	49	207.4	1.19961	0.32	1.81	0.15	11.2	29	18.2	2.49	0.27	0.21	0.4	0.3	2	0	0	0	9	0	0	4.54	4.35	15.15	1.33	0	0	1	0	0	3	7	8	1	0	10
630	32	33	0	0	22.98	0	0	0	0	0	1	12.57	1.94	23	130.4	0.83	1.51	1.26	0.24	11.7	24.3	18.2	3	0.29	0.26	0.44	1.33	0	0	0	0	28	0	0	5.16	4.96	17.02	1.45	0	0	2	0	0	0	5	7	1	0	16
631	34	38	0	0	30.27	1	0	0	0	0	9	6.64	4.51	15	100.4	0.655062	0.63	4.57	0.34	11.1	27.2	17.8	2.75	0.34	0.22	0.34	0.64	0	0	0	0	25	0	0	5.26	5.9	21.98	0.01	1	0	1	0	0	15	10	9	1	0	14
632	30	31	1	0	25.13	1	0	0	0	0	3	5.31	6.35	20	128.1	0.93123	0.83	3.32	0.3	11.1	23.7	18.1	2.69	0.24	0.2	0.3	0.72	2	0	0	0	6	0	0	5.76	5.14	14.02	2.01	0	0	1	0	0	14	15	6	1	0	10.57
633	33	31	0	0	30.4	1	0	0	1	0	3	6.86	14.97	25	265.5	0.65	0.15	4.63	0.21	11.7	25.7	17.7	4.49	0.27	0.72	0.43	0.3	0	0	0	0	24	0	0	4.5	4.58	13.95	3.2	0	0	1	0	0	9	13	12	1	0	11
634	32	31	0	0	20.85	1	0	0	0	0	1	4.3	4.51	21	221.4	0.22	0.52	5.44	0.19	11.6	23.4	17.7	2.94	0.27	0.14	0.34	0.31	0	0	0	0	12	0	0	4.48	5.31	14.86	1.96	1	1	1	0	0	10	8	6	1	0	13
635	29	29	0	0	21.78	1	0	0	0	0	2	6.38	8.22	11	144.4	1.14501	0.2	9.88	0.13	12.2	27.8	17.5	2.71	0.26	0.21	0.36	1.23	3	0	0	0	15	0	0	4.15	5.37	18.8	1.93	0	0	1	0	0	10	15	2	1	0	10
636	32	35	0	0	32.11	1	0	1	0	0	3	7.21	4.15	11	205	0.61	0.15	1.2	0.2	11.1	21.9	17.3	3.34	0.22	1.8	0.28	0.31	0	0	0	0	13	0	0	4.39	4.24	13.36	2.17	1	1	1	0	0	5	5	16	2	0	8
637	38	36	0	0	20.6	1	0	0	1	1	3	15.05	6.23	17	127.75	0.92	1.77	1.9	0.3	11.3	27.4	18	2.32	0.25	0.38	0.3	0.41	1	0	0	0	20	0	0	4.45	3.86	13.1	1.81	0	0	1	0	0	3	4	9	1	0	8
638	31	31	0	0	22.83	0	0	0	0	0	1	6.13	10.46	19	178.6	0.85	0.32	8.45	0.15	11.4	26.3	17.7	2.62	0.26	0.16	0.31	0.54	2	0	0	0	6	0	0	5.07	5.64	17.55	3.29	0	0	1	0	0	12	11	3	1	1	10
639	30	28	0	0	22.3	1	0	0	0	0	4	7.72	11.7	12	93.7	0.85	0.51	5.88	0.15	11.2	20.5	18.1	2.32	0.25	0.39	0.5	1.79	0	0	0	0	18	0	0	5.1	5.38	18.69	2.09	0	0	1	0	0	12	18	14	2	0	10
640	30	31	0	0	22.42	1	0	0	0	1	3	6.47	15.7	7	129	1.14	0.29	3.65	0.15	10.6	26.4	17.1	2.71	0.26	0.16	0.33	0.69	2	0	0	0	3	0	0	4.43	5.03	15.84	1.21	0	0	1	0	0	10	1	10	2	0	13
641	38	35	0	0	29.06	0	0	0	1	0	9	6.02	3.67	21	93.4	0.94	0.65	3.28	0.17	11.4	22.9	17.9	3.05	0.25	0.14	0.36	0.31	0	0	0	0	30	0	0	4.89	3.93	17.45	3.41	0	0	0	0	0	5	5	9	2	0	12
642	32	37	0	0	23.95	0	1	0	0	0	5	7.37	7.64	18	229.26	0.94	0.35	3.7	0.27	11	29.8	17.5	2.43	0.29	0.15	0.31	0.96	1	0	0	0	20	0	0	4.86	4.32	16.8	2.99	1	1	1	0	0	6	10	11	1	0	11
643	39	42	0	1	24.24	0	0	0	0	0	3	5.75	5.07	22	123	0.689273	0.15	1.53	0.18	12.7	25.9	17.9	2.61	0.28	0.18	0.24	0.47	1	0	0	0	15	0	0	4.77	4.73	14.45	1.67	1	0	1	1	0	5	6	21	2	0	10
644	32	35	0	0	18.06	0	0	0	0	1	1	7.64	5.01	24	82.75	0.37	1.09	4.57	0.19	12.4	31.3	17.5	1.91	0.3	0.42	0.36	1.49	2	0	0	0	6.73	0	0	4.9	3.7	15.62	2.13	0	0	1	0	0	4	6	6	2	0	12
645	34	42	1	0	22.75	0	0	0	1	0	3	7.57	7.3	40	147.82	0.967539	1.08	2.5	0.19	11	23.5	19.5	2.91	0.44	0.28	0.3	0.36	2	0	0	0	8	0	0	4.85	4.3	13.74	2.9	1	0	1	0	0	4	4	14	1	0	9.98
646	34	37	0	0	18.88	1	0	0	1	0	4	12.39	3.63	12	182	1.23	1.76	3.39	0.15	12.1	25	18.3	2.99	0.26	0.15	0.44	0.3	0	0	0	0	20	0	0	4.78	4.68	15.18	1.93	0	0	1	0	0	6	3	10	1	0	13
647	25	33	1	0	22.81	1	0	0	0	0	1	4.65	5.86	21	77.34	0.34	0.71	6	0.25	11.49	25	17.64	3.09	0.23	0.15	0.31	0.36	2	0	0	0	36	0	0	4.29	5.07	14.52	4.5	0	0	1	0	0	11	11	10	1	0	10.72
648	28	29	0	0	28.19	1	1	1	0	0	2	4.8	6.57	12	671.5	0.702932	0.33	4.48	0.22	11	23.9	18.1	3.35	0.28	0.16	0.34	1.36	0	0	0	0	23	0	0	5.26	5.72	17.17	1.61	0	0	0	0	0	15	12	12	2	0	11
649	37	47	0	0	23.59	0	0	1	0	0	7	8.73	5.6	26	119.3	1.14	0.71	1.14	0.21	10.6	21.5	17.2	3.55	0.26	0.21	0.38	0.85	1	0	0	0	21	0	0	5.9	5.22	20.37	1.97	0	1	1	0	0	2	2	4	2	0	8
650	28	29	0	0	20.91	1	0	0	0	0	1	1.95	1.16	20	223.8	0.702413	0.32	3.59	0.25	11.8	28.4	17.2	2.89	0.26	0.16	0.32	1.45	0	0	0	0	18	0	0	4.34	4.42	17.67	1.81	0	0	1	0	0	8	8	12	2	0	12
651	34	32	0	0	21.63	1	0	1	0	0	3	6.02	9.74	18	277.1	0.43	0.29	20	0.15	11.6	24.2	17.5	2.54	0.29	0.23	0.33	0.36	1	0	0	0	7	0	0	5.27	5.39	15.14	2.28	1	1	1	0	0	30	25	12	1	0	12
652	38	33	0	0	18.29	0	0	0	0	1	5	14.31	8.56	11	134.9	1.24	0.69	3.48	0.15	10.6	22.6	17.9	2.8	0.26	0.17	0.31	0.38	3	0	0	0	18	0	0	5.3	2.77	16.6	1.4	0	0	1	0	0	6	3	6	1	0	10
653	36	35	0	0	35.85	0	0	0	0	0	2	6.58	5.13	13	169.4	0.61	0.56	4.11	0.15	10.8	27.4	17.1	3.1	0.26	0.14	0.32	0.3	2	0	0	0	24	0	0	4.73	5.27	15.21	1.27	0	0	1	0	0	9	10	4	1	0	13
654	34	38	0	0	29.49	1	0	0	0	0	7	4.34	4.04	18	165.5	0.93	0.74	10.38	0.16	10.6	23.6	18.5	2.14	0.29	0.15	0.36	0.36	2	0	0	0	6	0	0	5.07	4.92	17.24	1.09	0	0	1	0	0	5	8	7	1	0	10
655	34	34	0	0	24.31	0	0	0	1	0	2	4.07	2.24	16	165.5	0.755062	0.15	6.12	0.32	10.8	24.3	18.7	2.39	0.27	0.16	0.33	0.62	2	0	0	0	8	0	0	4.57	3.34	18.77	1.75	0	0	2	0	0	9	10	15	1	0	9
656	30	32	1	0	20.85	1	0	0	0	0	2	5.82	7.04	20	118.4	1.03123	0.74	4.03	0.15	11.2	24	18.1	3.35	0.25	0.19	0.32	0.57	1	0	0	0	28	0	0	4.37	5.73	16.6	1.14	0	0	1	0	0	13	10	15	1	0	11.06
657	33	35	0	0	21.37	0	0	0	1	1	2	8.08	9.09	15	220.2	0.75	0.97	2.29	0.15	11.9	21.6	17.9	2.36	0.28	0.19	0.32	1.26	2	0	0	0	15	0	0	4.77	5	15.92	2.73	0	0	1	0	0	8	9	3	1	0	13
658	38	36	0	0	20.66	1	0	0	1	0	3	7.98	6	20	392	0.32	1.97	0.56	0.23	11.1	26.4	17.4	2.75	0.24	0.19	0.46	0.36	0	0	0	0	12	0	0	4.29	4.58	15.39	2.2	0	0	1	0	0	0	5	4	1	0	10
659	34	34	1	1	27.04	1	0	1	0	0	5	3.84	23.85	15	174.7	1.24501	0.38	0.05	0.17	11.1	29	17.2	2.94	0.35	0.24	0.28	0.37	1	0	0	0	11	0	0	5.11	5.21	14.91	4.54	0	0	1	0	0	12	0	13	2	0	12
660	31	31	0	0	23.78	0	1	1	0	0	3	6.44	7.74	25	55.56	0.71	0.86	0.61	0.27	11.4	22.1	18.5	3.05	0.23	0.29	0.34	1.21	2	0	0	0	22	0	0	5.22	5.72	15.6	3.77	0	0	1	0	0	3	3	13	2	0	10
661	32	30	0	0	27.1	0	0	0	1	1	4	7.97	5.26	54	104.1	1.02	0.37	4.03	0.2	11.1	21.1	18.7	2.62	0.25	0.16	0.32	0.54	0	0	0	0	6	0	0	4.7	3.66	15.87	2.72	0	0	1	0	0	5	6	15	1	0	7
662	30	28	0	0	22.68	0	0	0	1	0	2	5.34	1.97	9	87.63	0.95	0.7	3.41	0.5	11.4	24.6	17.7	2.71	0.26	0.17	0.34	0.97	3	0	0	0	14	0	0	5.26	5.73	13.92	6.36	0	0	2	0	0	2	3	9	1	0	10
663	31	31	0	0	22.29	1	0	1	0	0	1	5.58	2.91	22	695.1	0.95	0.81	2.4	0.15	10.7	25.1	18.1	2.32	0.24	0.16	0.45	0.36	0	0	0	0	3	0	0	4.44	4.93	14.02	1.28	0	0	1	0	0	9	7	13	1	0	9.5
664	39	46	0	0	27.33	1	0	0	1	0	1	5.59	3.29	11	117.8	1.24	0.86	3.36	0.33	10.3	22.6	17.7	2.46	0.26	0.27	0.34	0.3	0	0	0	0	4	0	0	4.6	5.61	16.37	0.88	0	0	1	0	0	3	5	5	2	0	9
665	28	26	0	0	21.87	1	0	0	0	0	3	8.17	5.86	19	213.4	1.04	0.88	2.16	0.16	11.8	26.2	17.8	2.26	0.24	0.16	0.31	0.98	3	0	0	0	12	0	0	5.01	5.45	13.68	1.21	0	0	1	0	0	7	11	13	2	0	9
666	28	26	0	0	21.87	1	0	0	0	0	3	8.17	5.86	19	63.56	1.04	0.88	2.16	0.16	11.8	26.2	17.8	2.26	0.24	0.16	0.31	0.98	3	0	0	0	12	0	0	5.01	5.45	13.68	1.21	0	0	1	0	0	7	11	13	2	0	9
667	39	36	0	0	28.19	0	0	0	0	0	1	6.57	3.84	19	107.63	0.789273	0.98	1.85	0.56	11	24.6	16.9	3.2	0.23	0.16	0.53	0.65	2	0	0	0	19	0	0	5.47	4.99	17.34	1.85	0	0	1	0	0	7	4	7	2	0	10
668	32	31	0	1	20.91	1	0	0	0	0	6	30.07	4.4	25	715.1	0.47	0.78	1.62	0.25	10.5	25.9	17.4	3.15	0.26	0.34	0.49	2.73	2	0	0	0	7	0	0	5.28	4.83	15.22	3.97	0	0	1	0	0	7	7	5	2	0	8
669	40	37	0	0	26.82	1	0	0	0	0	5	20.14	14.09	14	137.8	1.06754	0.18	1.78	0.1	10.8	23.5	17.8	2.41	0.49	0.19	0.31	1.16	0	0	0	0	17	0	0	4.06	4.94	14.5	2.38	0	0	1	0	0	4	4	8	2	0	8
670	35	32	0	0	22.18	1	0	0	0	0	7	5.57	7.37	13	233.4	1.33	0.81	3.38	0.17	11.3	25.1	17.9	1.78	0.29	0.19	0.33	0.4	0	0	0	0	4	0	0	5.2	4.42	15.46	2.91	0	0	1	0	0	12	14	16	1	0	11
671	28	33	0	0	24.18	0	0	0	0	0	1	2.39	0.98	25	83.56	0.44	0.76	4.71	0.94	11.7	25.5	17	2.92	0.25	0.16	0.32	0.63	1	0	0	0	15	0	0	4.91	4.42	19.36	2.64	0	0	1	0	0	9	10	16	1	0	12
672	35	32	0	0	22.35	0	0	0	0	0	2	5.06	3	23	63.56	0.802932	2.73	1.33	0.31	10.8	25.6	18.9	2.4	0.02	0.18	0.3	0.52	0	0	0	0	3	0	0	4.79	4.82	17.79	2.34	0	0	1	0	0	5	5	4	1	0	10
673	36	38	0	0	27.44	1	0	0	0	0	8	4.4	2.82	19	99.63	1.24	0.47	2.05	0.1	9.8	21.5	17.4	3.82	0.29	0.2	0.31	0.36	3	0	0	0	20	0	0	3.48	4.92	16.2	1.3	0	0	1	0	0	3	5	5	2	0	10
674	32	33	0	0	18.51	0	0	0	0	0	1	13.48	0.88	18	707.1	0.802413	1.01	4.92	0.21	12	28.1	17.6	2.59	0.27	0.22	0.42	1.71	0	0	0	0	23	0	0	4.32	4.57	13.51	1.69	0	0	1	0	0	7	9	14	1	0	14
675	27	27	0	0	19.68	1	0	0	0	0	2	6.25	0.97	33	129.8	0.53	0.6	2.97	0.12	11.3	28.4	18.2	1.77	0.25	0.2	0.3	2.12	3	0	0	0	4	0	0	4.6	5.37	14.73	1.99	0	0	1	0	0	2	7	14	2	0	11.5
676	30	30	0	0	25.59	0	0	0	0	0	1	4.86	5.22	31	225.4	1.34	4.88	4.53	5.63	11.1	27.1	18.8	2.76	0.24	7.54	0.31	0.46	1	0	0	0	22	0	0	4.08	5.18	13.64	2.43	0	1	1	0	0	7	9	16	1	0	9
677	27	31	0	1	26.32	0	0	0	0	0	1	6.4	4.59	43	75.56	0.71	1.14	2.51	2.2	10.6	34.5	16.6	2.83	0.23	7.15	0.31	0.96	3	0	0	0	22	0	0	4.95	5.17	18.71	0.68	1	1	1	0	0	1	10	10	2	0	10
678	37	36	1	0	27.84	0	1	0	0	0	5	9.07	5.92	18	233.33	0.684014	0.42	2.15	0.24	11.13	22.7	18.17	2.98	0.24	0.14	0.31	0.4	0	0	0	0	15.65	0	0	5.25	4.78	15.67	2.65	0	0	1	0	0	7	7	5	2	0	9
679	35	31	1	0	26.3	1	0	0	0	0	1	9.92	5.77	37	221.01	0.44109	0.7	1.57	0.16	11.39	25.22	18.36	2.51	0.26	0.1	0.4	1.69	1	0	0	0	14.79	0	0	5.11	5.02	15.83	2.3	0	0	1	0	0	4	4	7	2	0	10
680	40	38	0	0	20.49	1	0	1	1	1	1	14.81	1.1	19	169.4	1.56	0.44	0.66	0.17	10.67	29.2	18.16	2.89	0.19	0.14	0.29	1.51	2	0	0	0	13	0	0	4.9	4.51	13.08	3.02	0	0	1	0	0	3	3	9	2	0	9
681	45	42	1	1	25.11	0	1	0	0	0	2	10.98	4.49	34	233.72	0.370395	0.77	1.24	0.26	11.21	23.69	18.68	2.72	0.27	0.15	0.25	1.59	0	0	0	0	13.96	0	0	5.69	4.97	15.72	2.21	1	0	1	0	0	2	2	6	2	0	12
682	27	23	0	0	27.9	0	0	0	0	0	1	7.4	5.82	29	215.6	0.858823	0.39	3.44	0.19	11.39	25.31	17.91	2.81	0.26	0.01	0.34	0.23	2	1	1	0	17.18	0	0	4.97	4.88	15.13	2.78	0	0	0	0	0	11	10	6	2	0	9
683	37	38	0	0	18.96	1	1	0	1	0	7	8.8	5.76	8	218.19	0.672522	0.4	2.6	0.19	11.14	22.33	18.4	2.78	0.24	0.38	0.21	0.38	3	0	0	0	13.84	0	0	5.24	4.6	15.21	2.72	0	1	1	0	0	8	8	7	1	1	9
684	25	26	0	1	21.28	1	1	1	0	0	5	8.61	6.92	22	183.38	0.517473	0.55	3.65	0.07	11.67	26.56	18.45	2.1	0.24	0.33	0.45	0.87	2	0	0	0	10.73	0	0	4.77	4.75	15.35	2.62	1	1	1	0	0	8	9	10	1	0	11
685	27	30	0	0	23.57	0	1	1	1	0	2	8.67	7.31	15	186.06	0.517913	0.46	3.98	0.06	11.45	24.83	18.3	2.25	0.22	0.38	0.5	0.24	0	0	0	0	11.55	0	0	4.59	4.64	15.71	2.64	0	0	2	1	0	9	9	10	1	0	8
686	29	27	0	0	20.88	0	0	0	0	0	2	8.44	6.33	29	209.33	0.652369	0.49	3.09	0.16	11.37	25.11	18.03	2.63	0.24	0.06	0.3	0.2	0	0	0	0	15.47	0	0	4.84	4.88	15.69	2.58	0	1	1	0	0	8	8	7	2	0	9
687	40	30	0	0	21.67	0	0	0	1	1	1	9.33	5.26	35	259.53	0.662558	0.6	1.5	0.21	11.04	22.81	18.11	3	0.26	0.01	0.3	0.13	1	0	0	1	20.24	0	0	5.24	5.11	15.57	2.29	1	0	0	0	0	6	4	4	2	0	8
688	38	37	0	0	24.73	0	1	1	0	1	2	5.49	1.82	7	369.5	0.506853	0.71	3.17	0.06	11.27	24.7	19.66	2.52	0.27	0.17	0.25	0.38	1	0	0	1	6	0	0	5.43	5.19	14.1	1.27	0	0	0	0	0	5	7	11	2	0	10
689	40	38	0	0	23.62	0	0	0	0	0	3	9.4	4.03	27	208.18	0.526048	0.65	1.12	0.19	11.25	24.06	18.65	2.56	0.27	0.33	0.25	0.12	3	0	0	0	13.96	1	0	5.5	4.77	14.9	2.43	1	1	1	0	0	4	4	7	1	0	11
690	41	37	0	0	23.09	0	0	0	0	0	4.38	10.22	5.36	24	246.6	0.57252	0.66	0.36	0.31	11.39	24.3	18.73	2.8	0.29	0.06	0.28	0.07	2	0	1	0	12.48	1	0	5.93	4.99	15.29	2.45	0	0	1	0	0	2	4	6	2	0	15
691	29	28	0	1	30.06	1	0	0	0	0	3	8.51	5.57	28	187.91	0.565817	0.59	2.82	0.11	11.56	26.26	18.49	2.25	0.26	0.28	0.29	0.1	0	0	1	0	12.31	0	0	5.04	4.78	14.99	2.56	1	0	1	0	0	7	8	9	1	0	11
692	34	28	0	0	24.38	1	0	0	0	0	2	16.53	39.68	22	907.1	0.49133	1.66	2.52	0.18	11.87	27.4	18.26	2.79	0.25	0.22	0.28	0.06	2	0	0	0	13	0	0	5.22	4.59	14.81	2.99	0	0	0	0	0	4	4	10	2	0	11
693	31	35	0	0	23.08	0	1	1	0	0	3	6.16	4.89	18	148.2	0.91	0.76	1.61	0.39	11.77	27.3	19.56	3.35	0.22	0.18	0.38	0.14	2	0	1	0	31	0	0	4.7	4.73	16.86	2.96	0	1	1	0	0	3	4	7	2	0	9
694	37	44	0	0	23.1	0	0	0	0	1	8	6.67	8.29	23	143.4	0.827272	0.68	3.92	0.24	10.57	22.5	18.96	2.11	0.32	0.25	0.32	0.2	3	0	0	1	7	0	0	5.67	5.27	16.3	1.15	0	0	1	0	0	5	9	11	1	0	12
695	33	34	0	0	23.27	0	0	1	1	0	2	2.34	0.46	33	39.77	0.204554	1.28	2.05	0.06	11.57	21.3	19.46	2.49	0.82	0.29	0.26	0.07	0	0	1	0	16	0	0	5.35	4.37	14.29	3.64	0	0	0	0	0	10	7	21	1	0	13
696	31	29	0	1	23.56	0	1	0	0	0	2	7.47	4.26	26	192.99	0.792322	0.48	2.68	0.18	11.4	25.4	18.34	2.6	0.27	0.23	0.28	0.22	2	0	0	0	14.69	0	0	5.31	4.72	14.38	2.74	0	1	3	0	0	9	9	7	1	1	12
697	32	33	0	1	23.72	1	0	0	0	0	4.38	8.2	5.16	20	189.11	0.65474	0.49	2.79	0.16	11.35	24.67	18.38	2.51	0.25	0.3	0.24	0.3	0	0	0	0	13.06	0	0	5.12	4.64	14.96	2.67	1	0	2	0	0	8	8	8	1	0	10
698	31	33	1	0	23.75	0	1	0	0	0	4.57	8.14	5.18	19	183.59	0.658776	0.48	2.8	0.17	11.42	25.13	18.44	2.46	0.26	0.3	0.32	1.01	2	0	1	0	11.98	0	0	5.18	4.62	14.88	2.71	0	1	1	0	0	8	8	8	1	0	12
699	36	28	1	0	23.28	1	1	0	1	1	4.04	8.59	5.47	24	238.41	0.712159	0.56	2.38	0.16	11.22	23.57	18.36	2.7	0.27	0.2	0.27	0.17	2	0	0	1	17.23	0	0	5.24	4.94	14.92	2.45	1	1	1	0	0	7	7	7	1	0	9
700	39	36	1	0	22.22	1	1	1	0	0	3.29	9.58	5.62	27	230.42	0.56658	0.58	1.56	0.23	11.12	23.14	18.25	2.84	0.25	0.06	0.28	0.22	0	0	0	0	15.81	0	0	5.23	4.91	15.83	2.36	0	0	1	0	0	5	4	6	2	0	9
701	36	35	1	0	22.97	0	1	1	1	0	4.38	8.62	4.84	21	203.56	0.637338	0.54	2.18	0.18	11.25	23.92	18.45	2.61	0.26	0.28	0.3	0.05	3	0	0	0	14.03	0	0	5.28	4.71	14.96	2.56	1	0	1	0	0	6	7	7	1	1	11
702	35	32	1	0	25.18	1	1	1	0	0	3	8.61	5.11	21	214.29	0.679689	0.56	2.07	0.2	11.38	24.59	18.57	2.58	0.28	0.23	0.38	0.31	2	0	0	0	13.38	0	0	5.46	4.8	14.74	2.58	0	1	2	0	0	6	7	8	1	0	12
703	36	35	1	0	23.68	1	1	1	0	1	3.84	8.43	4.9	23	199.95	0.627041	0.51	2.61	0.14	11.09	23.15	18.23	2.65	0.24	0.29	0.21	0.91	2	0	0	0	15.97	0	0	4.97	4.68	15.23	2.5	0	1	1	0	0	8	7	7	1	0	7
704	29	29	1	0	22.67	1	1	1	0	0	3.6	8.55	6.56	24	203.49	0.651284	0.5	2.86	0.2	11.47	25.51	18.2	2.59	0.25	0.02	0.22	0.24	1	0	1	1	12.72	0	0	5.05	4.83	15.62	2.6	0	0	1	0	0	8	8	8	2	0	12
705	33	30	1	0	22.06	1	1	1	0	0	4.12	8.2	5.41	22	207.87	0.691788	0.51	2.83	0.15	11.27	24.18	18.31	2.59	0.26	0.23	0.36	0.16	2	0	0	0	15.17	0	0	5.08	4.77	14.99	2.55	0	0	2	1	0	8	8	8	1	1	9
706	30	35	0	1	22.77	1	1	1	0	0	4	5.74	4.26	12	164.8	1.27	0.15	1.51	0.39	10.97	21	17.66	3.74	0.29	0.18	0.3	0.24	1	0	1	0	26	0	0	4.87	4.56	15.85	2.65	0	0	0	0	0	6	8	16	2	0	13
707	36	34	0	0	20.16	1	0	0	1	0	4	9.41	5.84	24	224.16	0.608516	0.6	1.47	0.27	11.39	24.73	18.47	2.72	0.27	0.01	0.33	0.21	1	0	0	0	12.6	0	0	5.51	4.91	15.48	2.48	1	0	0	0	0	4	5	7	2	0	13
708	33	35	0	0	17.69	0	0	0	0	1	3.4	8.91	6.35	26	221.95	0.641416	0.54	2.4	0.21	11.32	24.49	18.19	2.71	0.26	0.01	0.39	0.33	3	0	0	0	14.7	0	0	5.11	4.92	15.7	2.46	0	1	3	0	0	7	7	7	2	0	11
709	27	31	0	0	22.06	0	0	1	0	1	4.02	7.44	5.55	20	162.69	0.675554	0.41	3.88	0.11	11.35	25.11	18.13	2.41	0.23	0.28	0.38	0.2	1	0	0	0	12.85	0	0	4.7	4.53	15.16	2.72	0	0	1	0	0	10	10	9	1	0	8
710	31	28	0	0	25.57	1	0	0	0	0	4.27	7.99	5.64	22	205.24	0.721089	0.51	3.02	0.15	11.37	24.8	18.34	2.54	0.26	0.19	0.24	0.16	0	0	1	0	14.35	0	0	5.11	4.79	14.89	2.59	0	0	2	0	0	8	8	8	1	1	11
711	32	31	0	1	18.87	0	0	1	0	0	2	6.34	8.26	10	196.2	0.19	0.36	2.26	0.32	11.27	27	19.16	2.82	0.36	0.16	0.31	0.34	2	0	0	0	20	0	0	4.76	4.62	14.37	9.75	0	0	1	0	0	3	4	9	1	0	8
712	38	31	0	0	25.18	1	0	0	1	0	7	5.19	4.15	19	131.3	0.658639	0.74	2.02	0.26	11.37	28	17.86	2.23	0.27	0.18	0.3	0.05	3	0	0	0	14	0	0	5.29	3.89	14.98	1.42	0	1	0	0	0	3	6	14	2	0	12
713	32	31	0	0	22.92	0	1	1	0	0	1	6.04	5.65	30	166.29	0.994815	0.74	4.84	0.09	11.45	23.68	17.58	2.61	0.3	0.19	0.27	0.14	3	0	0	0	10	0	0	4.89	5.41	16.85	1.77	0	0	1	0	0	16	15	12	2	0	11
714	40	36	0	1	22.67	0	0	0	1	0	2	7.82	5.2	8	170.8	0.65	0.21	0.3	0.15	12.87	25.1	18.96	2.14	0.24	0.23	0.34	0.13	0	0	1	0	24	0	0	4.34	4.45	17.04	1.33	0	1	0	0	0	2	2	4	1	0	11
715	33	37	0	0	24.58	1	0	0	1	0	2	8.42	10.77	35	129.1	0.633722	0.9	4.78	0.13	11.77	25.6	18.36	2.94	0.28	0.18	0.41	0.08	2	0	0	0	22	0	0	4.45	4.7	19.94	3.67	0	1	0	0	0	8	9	14	2	0	11
716	37	35	0	0	24.8	0	0	0	0	0	3	6.22	5.64	9	111.3	0.86	0.96	4.68	0.29	11.67	21.6	18.36	4.45	0.36	0.27	0.33	0.08	2	0	0	0	35	0	0	5.33	6.04	18.31	2.54	0	0	0	0	0	12	9	18	2	0	12
717	31	34	0	1	28.1	1	0	0	0	0	4.1	8.84	6.53	23	221.61	0.685477	0.57	2.16	0.25	11.56	25.88	18.43	2.62	0.28	0.07	0.26	0.07	2	1	0	0	11.9	0	0	5.44	4.96	15.34	2.54	0	1	0	0	0	6	7	8	2	0	14
718	29	31	1	0	23.28	0	0	1	0	1	4.48	7.76	5.7	20	191.82	0.729696	0.49	3.2	0.16	11.46	25.45	18.36	2.46	0.27	0.18	0.21	0.26	2	0	0	0	12.78	0	0	5.11	4.73	14.83	2.64	0	0	0	0	0	9	9	9	1	0	12
719	42	46	1	0	20.68	1	0	1	1	0	3.67	9.81	4.63	24	195.73	0.47193	0.6	0.9	0.27	11.04	22.95	18.37	2.81	0.25	0.1	0.24	0.22	0	0	0	0	12.71	0	0	5.36	4.67	15.92	2.36	1	1	0	0	0	3	3	6	2	0	11
720	31	31	1	0	22.22	1	1	1	0	0	3	7.35	4.85	23	197.93	0.818256	0.47	3.01	0.18	11.32	24.84	18.25	2.64	0.27	0.14	0.22	0.27	0	0	0	0	15.24	0	0	5.18	4.75	14.59	2.65	0	1	1	0	0	9	9	7	1	0	11
721	41	41	0	0	24.76	0	0	1	1	1	5	9.86	5.52	7	755.4	0.22	1.02	1.92	0.45	10.57	21.2	18.46	2.86	0.25	0.19	0.24	0.09	2	0	0	0	40	0	0	6.07	4.62	18.24	2.71	1	0	1	0	0	7	8	16	2	0	11
722	34	35	0	0	17.68	1	0	1	0	0	4	19.21	0.69	29	390.7	0.45	2.05	1.85	0.06	11.57	30.1	18.26	3.04	0.25	0.22	0.24	0.07	2	0	0	0	12	0	0	5.08	5.15	19.58	2.86	1	1	0	0	0	4	5	12	2	0	12
723	27	27	1	0	22.48	1	0	1	0	0	3.69	7.14	7.4	25	190.22	0.679322	0.56	4.39	0.14	11.5	25.5	18.15	2.48	0.27	0.14	0.3	2.02	1	0	0	0	13.3	0	0	4.71	4.62	15.37	2.57	1	0	2	0	0	11	11	9	2	1	11
724	28	34	0	0	24.69	1	0	1	0	0	4.91	7.19	5.99	19	182.99	0.737505	0.54	3.66	0.15	11.58	25.97	18.49	2.36	0.28	0.11	0.27	0.13	1	0	0	0	11.44	0	0	5.14	4.61	14.54	2.69	0	1	0	0	0	9	11	10	1	0	12
725	33	35	0	0	24.2	1	0	1	1	0	3.5	9.18	4.36	18	186.8	0.664964	0.45	1.37	0.25	11.33	25.15	18.42	2.58	0.24	0.3	0.24	0.12	3	0	0	0	11.07	0	0	5.47	4.83	15.19	2.6	0	1	1	0	0	4	6	7	1	0	13
726	31	34	0	1	21.55	0	1	1	0	1	4	8.67	3.48	24	184.04	0.65	2.7	1.74	0.1	12.27	29	17.46	2.2	0.32	0.17	0.63	0.13	0	0	0	0	8	0	0	4.81	4.71	15.26	0.95	0	0	1	0	0	4	3	22	1	0	12
727	32	34	0	0	22.6	1	0	1	0	0	3.25	8.59	6.32	26	205.3	0.639525	0.53	2.72	0.2	11.26	24.44	18.08	2.69	0.25	0.04	0.3	0.28	1	0	1	0	14.42	1	0	4.94	4.85	15.84	2.43	0	1	1	0	0	7	7	7	2	0	11
728	38	36	0	0	22.84	1	0	1	0	0	5.11	8.84	4.63	19	209.54	0.662951	0.62	1.34	0.25	11.37	24.57	18.74	2.6	0.29	0.17	0.25	0.54	2	0	0	0	11.74	0	0	5.74	4.78	14.64	2.49	0	0	0	0	0	4	6	8	1	1	14
729	43	40	0	0	24.03	0	0	1	1	1	3.16	9.73	5.16	28	228.2	0.540925	0.63	1.11	0.25	10.93	22.16	18.21	2.94	0.25	0.01	0.28	0.28	0	0	0	0	16.53	0	0	5.25	4.89	15.99	2.18	0	0	0	0	0	4	3	5	2	0	8
730	25	26	0	0	26.72	1	0	0	1	1	3.48	7.87	6.98	24	187.02	0.700506	0.47	3.62	0.18	11.51	26.13	18.06	2.51	0.25	0.07	0.29	2.71	2	0	0	0	12.23	0	0	4.82	4.8	15.68	2.6	1	0	2	0	0	9	10	8	2	0	12
731	29	29	0	0	21.85	1	1	1	1	0	4.32	7.6	5.63	20	182.85	0.723978	0.49	3.36	0.15	11.39	25.21	18.28	2.47	0.26	0.15	0.29	0.16	0	0	0	0	12.98	0	0	4.99	4.69	14.95	2.6	0	0	2	0	0	9	9	9	1	0	12
732	30	34	0	0	23.91	1	1	0	0	0	4.47	7.76	5.66	20	195.12	0.740749	0.52	3.07	0.17	11.42	25.26	18.36	2.49	0.27	0.12	0.24	1.09	0	0	0	0	13.12	0	0	5.15	4.76	14.84	2.57	0	1	0	0	0	8	9	9	1	0	12
733	39	35	0	0	23.72	0	1	0	1	0	4.96	8.34	4.99	21	215.55	0.670966	0.67	1.94	0.22	11.29	23.92	18.68	2.62	0.3	0.09	0.25	0.23	1	0	0	0	13.57	0	0	5.57	4.73	14.58	2.41	0	1	1	0	0	6	6	8	1	0	12
734	43	41	0	0	22.58	0	1	1	1	0	3	8.63	10.28	8	140.8	0.83	0.44	0.47	0.6	11.27	22.2	17.06	4.11	0.26	0.15	0.26	1.82	0	0	0	0	34	0	0	8.86	4.54	16.28	1.62	1	0	0	0	0	9	10	6	2	0	12
735	38	34	1	0	21.92	0	1	1	0	1	2	5.59	7.48	33	107	0.63528	0.16	4.96	0.08	11.6	22.76	17.83	2.66	0.37	0.22	0.28	0.21	0	0	0	0	20	0	0	4.72	4.33	14.41	1.62	0	0	1	0	0	15	14	13	2	0	11
736	26	24	1	0	18.87	1	1	0	0	0	4.05	7.17	6.19	21	186.95	0.779173	0.46	4.01	0.12	11.41	25.47	18.13	2.44	0.26	0.1	0.29	0.1	1	0	0	0	14.11	0	0	4.8	4.75	14.98	2.59	0	1	2	0	0	10	10	9	1	0	9
737	33	34	1	0	21.25	0	1	0	0	0	3.59	8.87	5.04	23	215.42	0.738416	0.45	2.03	0.2	11.13	24.03	18.1	2.72	0.24	0.19	0.27	0.55	3	0	0	0	16.12	0	0	5.11	5.04	15.43	2.4	1	0	0	0	0	6	6	6	1	0	11
738	35	36	1	1	20.36	0	1	1	0	0	4.42	8.2	4.81	20	184.03	0.652768	0.54	2.39	0.19	11.22	24.13	18.38	2.57	0.26	0.18	0.23	0.18	2	0	0	0	12.98	0	0	5.19	4.64	15.03	2.49	1	1	0	0	0	7	7	8	1	0	12
739	31	33	1	0	26.63	1	1	0	0	1	4	7.29	5.49	20	171.35	0.685407	0.55	3.47	0.15	11.37	24.94	18.39	2.43	0.27	0.12	0.24	0.13	1	0	0	0	12.12	0	0	5.02	4.52	14.8	2.58	0	1	1	0	0	9	9	9	1	0	12
740	25	29	1	0	22.92	1	1	0	0	1	3.82	7.87	6.7	22	171.22	0.679452	0.48	3.4	0.21	11.56	26.55	18.16	2.45	0.26	0.07	0.26	0.29	0	0	1	0	10.1	0	0	4.94	4.71	15.62	2.63	0	0	0	0	0	8	10	9	2	0	12
741	28	26	1	0	24.39	1	1	0	0	0	2	6.65	6.28	25	100.3	0.748435	0.24	5.86	0.07	11.47	26.6	17.36	2.31	0.27	0.16	0.27	0.18	0	0	0	0	2	0	0	4.66	5.13	15.52	2.54	0	0	0	0	0	5	10	19	2	0	11
742	39	41	0	0	23.4	0	1	0	1	1	3	21.63	3.42	20	110.44	0.34	1.29	1.35	0.27	11.17	25.2	18.06	1.88	0.24	0.16	0.25	0.51	3	0	0	0	6	0	0	4.63	4.86	15.27	2.36	0	0	1	0	0	7	7	15	2	0	8
743	31	25	0	0	22.87	1	1	0	1	1	2	14.22	3.12	27	663.9	0.53	3.11	1.26	0.19	11.47	32.6	18.06	2.36	0.45	0.33	0.29	0.13	2	0	0	0	23	0	0	5.3	4.24	12.14	2.66	0	0	0	0	0	5	5	14	2	0	11
744	37	36	1	0	23.56	0	0	0	1	1	4	5.63	3.05	15	90.54	1.08	0.42	2.16	0.5	11.47	21.1	16.76	2.99	0.25	0.16	0.26	0.81	1	0	0	1	27	0	0	6.22	4.66	12.11	2.85	0	0	1	0	0	5	5	6	1	0	11
745	30	34	0	0	24.39	1	0	1	0	0	6	5.66	3.14	30	134.8	0.34	0.15	2.33	0.31	11.57	29.4	17.36	3.64	0.26	0.14	0.26	0.28	0	0	0	0	18	0	0	5.09	4.85	13.73	4.51	0	1	1	0	0	9	7	15	1	0	11
746	41	50	1	0	19.23	0	0	0	1	0	3.41	9.36	4.36	23	161.08	0.437676	0.56	1.35	0.26	10.92	22.69	18.18	2.77	0.23	0.08	0.27	1.2	2	0	0	0	11.94	0	0	5.05	4.48	16.21	2.33	0	1	1	0	0	4	4	7	2	0	8
747	35	41	1	1	21.61	1	0	1	0	0	8	9.16	6.18	7	178.54	0.518548	0.56	2.23	0.22	11.38	24.31	18.7	2.39	0.26	0.23	0.28	0.6	2	0	0	0	7.5	0	0	5.33	4.54	15.43	2.5	0	1	2	0	0	5	7	10	1	0	13
748	28	27	1	0	24.02	1	0	0	0	0	4.83	7.52	5.8	19	186.07	0.7707	0.53	3.13	0.19	11.55	26.15	18.45	2.41	0.28	0.06	0.22	1.45	0	0	0	0	11.21	0	0	5.25	4.75	14.68	2.6	0	1	0	0	0	8	10	9	1	0	13
749	37	37	1	0	24.17	1	0	0	0	0	4.63	7.87	4.93	21	186.88	0.650099	0.62	2.57	0.19	11.2	23.78	18.47	2.57	0.28	0.09	0.24	0.18	0	0	0	0	13.3	0	0	5.22	4.58	14.85	2.41	1	0	0	0	0	7	7	9	1	0	11
750	36	34	1	0	25.24	0	0	0	0	0	4	8.44	4.88	19	202.13	0.700971	0.62	1.71	0.25	11.39	24.94	18.67	2.57	0.29	0.08	0.25	0.93	1	0	0	0	11.45	0	0	5.65	4.78	14.65	2.46	0	0	1	0	0	5	7	8	1	1	14
751	37	36	1	0	23.74	1	1	1	0	0	4	5.28	5.11	19	211	0.27	0.44	2.78	0.08	11.22	23.67	18.47	2.29	0.23	0.16	0.27	0.71	2	0	0	0	7	0	0	4.68	4.94	15.77	1.99	0	0	0	0	0	6	7	10	2	0	11
752	27	34	0	0	24.5	1	0	0	0	0	3	6.39	7.96	19	127.2	0.14	0.23	4.06	0.2	11.67	27.6	16.96	2.58	0.23	0.17	0.3	1.62	0	0	0	0	11	0	0	5.26	4.66	12.87	2.37	0	0	0	0	0	4	5	11	2	0	11
753	38	36	1	0	22.84	1	0	0	1	0	4.21	8.36	4.72	22	198.78	0.66191	0.58	2.11	0.2	11.08	23.29	18.34	2.68	0.26	0.11	0.3	1.76	1	0	0	0	14.82	0	0	5.21	4.74	15.11	2.33	1	0	1	0	0	6	6	7	1	1	11
754	30	34	0	0	22.91	0	0	0	0	1	4	8.89	6.12	15	101.9	0.64	0.54	2.23	0.19	11.67	28.2	15.86	3.26	0.22	0.17	0.26	0.5	2	0	0	0	10	0	0	4.38	4.79	13.83	1.47	0	0	1	0	0	9	10	8	1	0	11
755	34	32	0	1	23.32	1	0	1	1	0	2	8.06	4.81	14	162.1	0.49	0.82	0.66	0.28	10.87	22.6	16.36	2.19	0.25	0.18	0.58	1.38	1	0	0	0	25	0	0	4.99	4.99	14.31	2.05	0	1	1	0	0	3	2	4	1	0	11
756	38	40	1	0	24.39	1	0	0	0	1	3.4	9.01	5.33	25	191.53	0.56176	0.59	1.78	0.25	11.06	23.4	18.16	2.78	0.25	0.07	0.23	0.47	3	0	1	0	13.55	0	0	5.1	4.74	15.98	2.27	0	0	0	0	0	5	5	7	2	0	11
757	43	42	1	0	24.06	1	0	0	0	0	3.39	9.56	4.98	26	213	0.542761	0.65	1.01	0.27	10.93	22.45	18.25	2.91	0.26	0.08	0.31	0.24	0	0	0	0	14.97	0	0	5.31	4.83	15.98	2.14	1	1	1	0	0	3	3	6	2	0	11
758	37	35	1	0	17.43	1	0	1	1	1	3	7.13	3.77	38	131	0.658156	0.41	0.63	0.35	10.97	25	16.66	3.2	0.27	0.18	0.29	0.94	2	0	1	0	14	0	0	4.4	5.63	15.22	3.13	1	0	0	0	0	3	2	5	2	0	11
759	30	28	1	0	23.62	1	0	0	1	0	4.47	7.54	5.67	20	189.21	0.760838	0.54	3.13	0.18	11.38	25.26	18.32	2.5	0.27	0.03	0.27	1.97	0	0	0	0	12.93	0	0	5.12	4.77	14.87	2.49	0	0	1	0	0	8	9	9	1	0	11
760	35	35	0	0	24.09	1	0	1	1	1	2	6.76	7.71	15	124	0.619959	0.6	2.14	0.06	12.07	20.7	17.76	2.42	0.3	0.23	0.26	0.69	1	0	0	0	12	0	0	4.63	6.21	17.21	1.25	0	1	1	0	0	7	7	15	2	0	12
761	43	39	1	1	19.32	1	0	0	0	0	3.32	9.53	5.24	27	227.32	0.580125	0.67	1.04	0.27	10.94	22.41	18.23	2.94	0.26	0.14	0.31	0.63	1	0	0	0	16.02	0	0	5.33	4.94	15.93	2.09	0	1	1	0	0	4	3	6	2	0	11
762	41	41	1	0	19.91	0	0	0	0	1	3.21	9.24	5.15	26	203.19	0.552743	0.62	1.47	0.25	10.93	22.57	18.13	2.87	0.25	0.09	0.29	0.22	2	0	0	0	15.08	0	0	5.12	4.79	16.07	2.16	0	1	1	0	0	4	4	6	2	0	8
763	33	36	0	0	21.98	1	0	0	0	0	2	7.59	7.33	17	187.4	0.629185	1.31	3.62	0.08	11.77	28.1	17.66	2.25	0.22	0.16	0.28	0.4	0	0	0	0	7	0	0	5.45	4.73	15.02	3.38	1	1	0	0	0	8	9	19	2	0	11
764	33	35	1	0	23.2	1	0	1	0	0	4.6	7.83	4.96	19	171.74	0.686231	0.55	2.61	0.21	11.28	24.77	18.38	2.51	0.27	0.08	0.23	0.13	0	0	0	0	11.65	0	0	5.19	4.62	14.98	2.47	1	0	0	0	0	7	8	9	1	0	11
765	38	37	1	0	24.68	1	0	0	0	1	4.23	8.27	4.64	22	191.09	0.659376	0.59	2.13	0.2	11.06	23.31	18.32	2.67	0.26	0.08	0.31	0.31	0	0	0	0	14.37	0	0	5.19	4.7	15.15	2.3	1	1	0	0	0	6	6	8	1	0	11
766	40	39	0	0	22.84	0	0	0	1	0	3	7.9	9.09	8	175.2	0.303808	0.16	0.97	0.56	11.27	26.8	19.86	1.84	0.19	0.17	0.21	2.26	2	0	0	0	9	0	0	4.93	4.49	15.63	2.24	0	0	1	0	0	1	4	6	2	0	8
767	42	57	0	0	24.22	1	1	1	1	0	1	7	2.28	14	263.6	0.13	0.9	0.87	0.23	10.77	25.7	17.96	2.58	0.21	0.15	0.27	2.11	2	0	0	0	14	0	0	5.27	3.81	12.34	2.27	0	0	1	0	0	3	4	7	2	0	11
768	26	26	0	0	24.01	1	0	1	0	0	1	6.99	1.52	25	130.7	0.713013	0.96	0.51	0.26	11.57	28.5	18.06	2.68	0.24	0.17	0.24	0.6	1	0	0	0	11	0	0	5.04	5.15	14.13	1.27	0	0	1	0	0	3	3	15	2	0	12
769	31	34	1	0	24.66	1	0	0	0	0	4.53	7.57	5.38	20	178.19	0.734528	0.54	2.97	0.2	11.34	25.11	18.33	2.49	0.27	0.03	0.3	0.12	0	0	0	0	12.2	0	0	5.13	4.7	14.93	2.47	0	1	2	0	0	8	9	9	1	0	11
770	31	28	1	0	21.44	1	0	1	0	1	4	5.09	4.04	36	164.7	1.27	1.62	7.02	0.16	11.17	21.2	17.06	2.87	0.27	0.19	0.25	0.96	2	0	0	0	8	0	0	5.29	4.44	16.4	2.86	1	1	1	0	0	14	12	10	2	0	10
771	38	35	1	0	24.75	0	0	0	0	1	5	8.47	4.74	20	204.67	0.704443	0.65	1.51	0.27	11.29	24.44	18.63	2.63	0.3	0.01	0.3	0.13	1	0	0	0	12.13	0	0	5.66	4.81	14.72	2.34	1	1	1	0	0	5	6	8	1	0	14
772	33	37	1	0	23.18	0	0	0	0	0	3.2	8.27	5.79	24	170.36	0.600941	0.53	2.75	0.22	11.11	24.08	17.98	2.67	0.24	0.12	0.27	1.23	1	0	0	0	13.02	0	0	4.79	4.67	16.08	2.32	0	1	0	0	0	7	7	8	2	0	8
773	38	36	1	0	22.86	1	0	0	0	0	4.39	8.26	4.71	21	195.46	0.680719	0.61	2.01	0.22	11.1	23.55	18.38	2.67	0.27	0.03	0.32	0.28	2	0	0	0	14.03	0	0	5.29	4.75	15.05	2.28	0	1	1	0	0	6	6	8	1	0	10
774	40	44	1	0	24.58	1	0	0	1	0	3.2	9	4.94	25	178.47	0.524683	0.59	1.69	0.25	10.9	22.68	18.07	2.82	0.24	0.08	0.29	1.37	2	0	0	0	13.81	0	0	4.99	4.65	16.19	2.18	0	1	1	0	0	5	4	7	2	0	8
775	41	39	0	0	17.63	0	0	1	1	1	1	20.21	3.42	205	115.7	0.47	0.3	1.07	1.23	10.87	24.1	17.46	3.13	0.24	0.19	0.39	0.54	3	0	0	0	8	0	0	4.94	4.31	13.21	3.61	0	0	1	0	0	2	1	4	1	0	10
776	31	35	0	0	23.55	1	1	1	0	0	2	6.56	7.75	7	181.5	1.66	0.53	5.04	0.15	11.47	25	18.16	2.26	0.23	0.28	0.31	1.07	0	0	0	0	8	0	0	4.98	5.39	17.83	1.26	0	0	1	0	0	10	20	21	1	0	13
777	41	44	1	0	20.36	1	0	0	0	0	4.27	8.47	3.93	21	171.56	0.588013	0.6	1.7	0.22	10.93	22.69	18.34	2.69	0.26	0.11	0.37	0.41	0	0	0	0	13.37	0	0	5.2	4.55	15.31	2.26	0	1	0	0	0	5	5	8	1	0	9
778	34	35	0	0	22.99	0	0	1	0	0	4.65	7.31	5.22	20	171.78	0.693409	0.6	3.08	0.19	11.25	24.38	18.39	2.51	0.28	0.01	0.23	0.28	1	0	0	0	12.41	0	0	5.1	4.55	14.86	2.39	1	0	0	0	0	8	8	9	1	0	10
779	32	28	0	0	23.12	1	0	0	1	0	3.64	8.31	6.56	25	211.77	0.722424	0.6	2.5	0.25	11.33	25.05	18.18	2.69	0.28	0.27	0.25	1.08	3	0	0	0	13.52	0	0	5.17	4.98	15.63	2.27	0	1	0	0	0	7	7	8	2	0	12
780	45	43	1	0	24.55	1	0	0	0	1	3.03	9.49	4.86	28	213.51	0.541828	0.67	1.03	0.27	10.75	21.56	18.1	2.99	0.25	0.15	0.37	1.49	0	0	0	0	16.6	0	0	5.16	4.85	16.18	1.98	0	1	1	0	0	4	2	6	2	0	7
781	33	32	0	0	21.44	1	0	0	0	1	6	4.94	5.06	9	193.5	0.42	0.55	2.05	0.12	11.67	28.6	17.76	2.25	0.25	0.16	0.27	0.39	2	0	1	0	6	0	0	4.27	3.68	13.58	0.94	0	0	1	0	0	10	10	21	1	0	7
782	40	38	0	0	21.49	0	0	0	0	0	2.79	8.86	5.49	28	205.54	0.593518	0.61	1.98	0.23	10.83	22.21	17.93	2.91	0.24	0.18	0.3	1.45	0	0	0	0	16.9	0	0	4.88	4.85	16.22	2.05	0	1	0	0	0	6	4	6	2	0	6
783	29	35	0	0	21.36	1	0	1	1	0	4	3.5	4.46	19	206.5	0.58	0.47	1.55	0.24	11.27	25.2	17.16	2.67	0.22	0.21	0.23	1.44	2	0	0	0	8	0	0	4.46	4.87	15.57	1.81	0	0	1	0	0	4	6	14	2	0	11
784	27	27	1	0	23.04	1	0	0	1	0	2	3.94	1.58	26	419.6	0.99	0.16	4.29	0.26	11.57	23.9	17.96	2.64	0.22	0.14	0.26	0.72	3	0	0	0	9	0	0	4.13	5.08	17.62	1.46	0	0	1	0	0	9	8	11	1	0	11
785	31	28	0	1	23.54	0	0	0	0	0	4.46	7.44	5.65	21	189.89	0.78082	0.57	3.03	0.2	11.33	25.07	18.3	2.53	0.28	0.06	0.22	0.16	2	0	0	0	13.18	0	0	5.14	4.8	14.89	2.37	1	1	0	0	0	8	9	9	1	1	11
786	29	32	0	0	21.71	0	1	0	0	0	1	5.23	7.8	54	177.4	0.46	0.83	3.62	0.16	10.77	22.6	17.66	2.12	0.21	0.23	0.24	1.09	1	0	0	0	10	0	0	4.74	5.09	19.61	2.39	0	0	1	0	0	7	4	19	2	0	10
787	40	44	1	0	24.25	0	0	0	0	0	3.83	9.09	4.89	23	179.32	0.548105	0.64	1.22	0.3	11.06	23.58	18.3	2.77	0.26	0.14	0.29	1.25	1	0	0	0	11.44	0	0	5.33	4.68	15.9	2.2	0	1	0	0	0	3	4	7	2	0	11
788	38	35	0	0	23.04	1	0	1	0	0	3	7.87	5.56	30	206.2	0.777037	0.93	1.19	0.14	10.67	26.5	18.26	2.58	0.24	0.21	0.28	2.46	0	0	0	0	7	0	0	4.1	4.67	16.09	1.27	0	0	2	0	0	3	4	9	2	0	10
789	27	29	1	0	31.54	1	1	0	0	0	2	8.72	4.26	29	120.9	0.2	0.86	2.98	0.05	10.97	23.6	17.66	2.65	0.32	0.74	0.25	0.77	1	0	0	0	6	0	0	5.28	5.23	19.31	1.75	1	0	0	0	0	8	8	20	2	0	10
790	29	29	0	0	23.98	1	0	0	1	1	3.9	6.87	7.16	24	179.2	0.71145	0.64	4.06	0.19	11.41	25.4	18.17	2.51	0.29	0.36	0.26	1.23	0	0	0	0	12.32	0	0	4.83	4.64	15.38	2.34	0	1	1	0	0	10	10	10	2	1	10
791	32	35	1	0	23.53	1	0	0	1	0	3.78	8.24	6.38	24	199.54	0.710391	0.61	2.43	0.27	11.33	25.21	18.2	2.66	0.28	0.29	0.27	1.09	1	0	0	0	12.39	0	0	5.19	4.91	15.63	2.27	0	0	1	0	0	6	7	8	2	0	12
792	36	36	0	1	23.62	0	0	0	0	0	3.51	8.56	5.75	25	192.25	0.63705	0.61	2.05	0.26	11.12	23.99	18.14	2.75	0.26	0.23	0.24	1.24	0	0	0	0	13.23	0	0	5.12	4.82	15.88	2.19	0	0	1	0	0	5	6	7	2	0	10
793	30	28	1	0	22.13	0	0	1	0	0	4	5.95	9.65	9	213.3	1.31	1.13	8.76	0.07	11.67	30.9	17.96	2.25	0.23	0.23	0.47	1.38	0	0	0	0	6	0	0	5.26	4.97	15.36	2.15	0	0	2	0	0	10	20	21	1	0	12
794	41	40	1	0	20.49	1	0	0	0	0	3.37	9.04	5.24	26	202.31	0.591943	0.65	1.4	0.28	10.94	22.82	18.16	2.87	0.26	0.22	0.32	1.37	0	0	1	0	14.57	0	0	5.2	4.84	16	2.06	0	1	0	0	0	4	4	7	2	0	11
795	31	29	0	0	22.52	1	0	0	0	1	4.3	7.31	5.58	21	181.58	0.77287	0.56	3.18	0.19	11.26	24.83	18.22	2.53	0.27	0.08	0.24	0.23	2	0	1	0	13.39	0	0	5.02	4.76	15.01	2.34	0	1	1	0	0	8	9	9	1	0	10
796	30	28	0	0	24.25	1	0	1	0	1	5	3.87	2.81	22	140.9	1.33	0.15	6.64	0.2	11.27	20.9	17.46	2.99	0.26	0.18	0.25	1.07	1	0	0	0	14	0	0	5.44	4.74	14.1	2.05	0	1	0	0	0	30	30	7	1	0	10
797	39	37	1	0	22.79	0	0	0	0	0	4.64	7.71	4.87	21	189.3	0.687804	0.68	2.34	0.22	11.1	23.44	18.45	2.64	0.29	0.09	0.33	0.41	3	0	0	0	13.7	0	0	5.29	4.65	14.87	2.2	0	0	0	0	0	6	7	9	1	0	11
798	34	35	1	0	24.19	0	0	0	0	0	3.92	8.43	6.04	24	196.06	0.68445	0.63	2.04	0.29	11.3	24.98	18.27	2.68	0.28	0.29	0.24	1.12	2	0	0	0	11.79	0	0	5.3	4.88	15.63	2.23	1	1	1	0	0	5	6	8	2	0	13
799	33	35	1	0	23.83	1	0	0	0	0	4.6	7.58	5.31	20	184.88	0.760087	0.6	2.65	0.22	11.28	24.85	18.36	2.55	0.28	0.09	0.27	0.21	1	0	0	0	12.53	0	0	5.24	4.77	14.9	2.32	1	1	2	0	0	7	8	9	1	1	12
800	30	35	0	1	24.42	0	0	1	1	0	2	5.88	5.76	25	207.1	1.10464	1.61	5.09	0.07	11.17	23.7	18.56	2.43	0.26	0.23	0.32	0.26	3	0	0	0	4	0	0	5.51	5.02	15.11	1.35	0	0	0	0	0	15	16	10	1	0	11
801	28	31	1	0	32.21	1	0	1	1	0	3.3	7.54	6.49	24	163.66	0.692038	0.52	3.48	0.21	11.26	25.23	17.91	2.58	0.25	0.26	0.23	1.18	0	0	0	0	12.19	0	0	4.69	4.72	15.96	2.33	0	0	1	0	0	8	9	9	2	0	9
802	30	28	1	1	23.22	1	1	0	0	0	7	9.83	5.78	18	119.7	0.457088	0.63	0.67	0.24	11.77	24.7	18.26	2.09	0.25	0.18	0.22	0.05	1	0	0	0	16	0	0	5.25	4.68	17.65	1.51	0	0	0	0	0	6	4	5	1	0	11
803	29	37	1	0	21.66	0	0	0	0	0	3.43	7.63	5.93	22	139.18	0.625388	0.51	3.27	0.23	11.21	25.12	17.94	2.54	0.24	0.2	0.25	1.2	1	0	0	0	10.43	0	0	4.68	4.55	16.07	2.37	1	0	1	0	0	8	8	9	2	0	9
804	36	35	1	0	23.97	0	0	0	1	0	4.89	7.99	5.35	21	215.12	0.796498	0.67	1.94	0.26	11.31	24.75	18.54	2.64	0.31	0.17	0.31	0.18	1	0	0	0	13.21	0	0	5.59	4.96	14.67	2.21	0	1	2	0	0	6	7	9	1	1	14
805	32	35	1	0	23.77	0	0	0	0	0	3.42	8.01	6.42	25	194.36	0.712951	0.59	2.75	0.25	11.21	24.69	18.04	2.69	0.27	0.33	0.26	1.21	0	0	0	0	13.59	0	0	4.98	4.9	15.83	2.19	0	0	1	0	0	7	7	8	2	0	11
806	29	35	0	0	22.08	1	1	0	0	1	4	6.96	4.26	41	84.76	0.719102	0.75	3.53	0.26	10.67	21.1	17.76	2.72	0.24	0.16	0.23	1.7	1	0	0	0	11	0	0	4.88	5.17	17.53	1.97	0	1	0	0	0	5	6	16	2	0	11
807	36	38	1	1	22.6	1	0	0	0	0	4.55	7.78	4.61	19	165.69	0.683783	0.6	2.29	0.24	11.13	24.1	18.34	2.58	0.27	0.04	0.33	0.32	2	0	0	0	11.88	0	0	5.21	4.62	15.1	2.28	1	0	0	0	0	6	7	9	1	0	11
808	37	35	1	1	29.44	1	0	0	0	0	3.66	8.6	5.79	25	201.24	0.664982	0.65	1.8	0.29	11.13	24.04	18.2	2.78	0.28	0.31	0.27	1.26	0	0	0	0	13.26	0	0	5.26	4.9	15.79	2.11	0	0	1	0	0	5	5	7	2	0	11
809	40	43	0	0	20.09	0	0	0	0	0	3.63	8.86	5	24	178.52	0.572008	0.65	1.41	0.3	10.98	23.31	18.2	2.8	0.26	0.23	0.32	1.35	1	0	0	1	12.3	0	0	5.22	4.71	16	2.11	0	1	0	0	0	4	4	7	2	0	11
810	31	28	0	0	24.54	1	0	0	1	0	4	8.72	5.9	23	141.3	0.4	1.81	2.14	0.17	11.57	25.5	18.96	1.7	0.27	0.18	0.43	1.59	2	0	0	0	16	0	0	4.88	5.71	20.56	1.08	0	0	1	0	0	3	4	7	2	0	12
811	38	36	0	0	23	0	0	0	0	0	1	6.41	2.11	13	94.83	1.06846	0.59	1.74	0.09	10.97	21	19.36	2.45	0.24	0.15	0.38	0.53	0	0	0	0	5	0	0	5.34	4.83	13.75	1.86	0	1	1	0	0	9	9	8	2	0	11
812	32	35	0	0	26.17	1	0	1	0	0	4.3	7.28	5.55	21	184.22	0.786155	0.58	3.07	0.2	11.21	24.63	18.21	2.57	0.28	0.15	0.27	0.29	1	0	0	0	13.71	0	0	5.05	4.79	15.02	2.26	1	0	1	0	0	8	8	9	1	0	11
813	34	35	0	0	24.67	0	1	0	1	1	2	5.2	3.26	36	121	0.696418	0.8	0.96	0.18	10.77	22.6	17.76	2.5	0.26	0.17	0.28	1.19	1	0	0	0	4	0	0	5.33	5.03	18.78	3	1	1	1	0	0	4	5	12	2	0	11
814	33	35	0	0	23.69	1	0	0	0	0	4.92	7.54	5.12	19	173.05	0.754215	0.61	2.45	0.25	11.33	25.26	18.45	2.51	0.29	0.12	0.28	0.18	0	0	0	0	10.73	0	0	5.36	4.71	14.83	2.33	0	0	1	0	0	6	8	10	1	0	13
815	37	35	0	0	24.03	0	0	0	0	0	3.57	8.51	5.8	25	199.18	0.668226	0.65	1.89	0.28	11.1	23.92	18.16	2.79	0.27	0.33	0.28	1.3	3	0	0	0	13.54	0	0	5.2	4.9	15.84	2.08	0	1	1	0	0	5	5	7	2	0	11
816	27	25	0	0	22.26	1	0	1	1	0	3.54	7.43	7.02	24	186.53	0.779194	0.57	3.43	0.24	11.38	25.86	18	2.58	0.27	0.4	0.22	1.12	2	0	0	0	12.52	0	0	4.89	4.92	15.71	2.26	1	0	1	0	0	9	9	9	2	0	11
817	31	34	0	0	23.51	1	0	0	0	0	3.38	7.81	6.64	25	195.5	0.744168	0.6	2.94	0.24	11.23	24.86	18	2.69	0.27	0.39	0.25	1.23	2	0	0	0	13.8	0	0	4.94	4.94	15.81	2.16	1	0	0	0	0	8	8	8	2	0	11
818	31	35	0	0	22.6	1	1	0	0	0	2	10.54	12.97	18	229.1	0.486446	0.16	4.95	0.1	12.17	26.1	17.46	2.22	0.28	0.25	0.39	0.66	0	0	0	0	23	0	0	4.78	5.11	16.56	2.35	0	0	1	0	0	10	13	14	2	0	12
819	34	31	0	1	22.96	0	1	0	0	0	4	4.37	1.81	15	53.85	1.05712	0.3	2.1	0.2	11.37	26.4	17.46	2.62	0.25	0.24	0.24	0.34	1	0	1	0	13	0	0	4.73	4.88	15.32	2.13	0	1	0	0	0	12	11	10	1	0	11
820	36	34	0	1	22.77	0	0	0	0	0	1	7.98	4.91	62	234.7	0.91	2.06	2.53	0.28	11.57	24	18.46	2.08	0.25	0.23	0.4	0.13	0	0	0	0	4	0	0	4.72	4.88	16.22	1.27	1	1	0	0	0	6	5	13	2	0	11
821	40	45	0	0	24.79	1	0	0	0	1	3.68	8.76	4.83	23	165.76	0.558011	0.64	1.42	0.31	10.96	23.34	18.19	2.77	0.26	0.24	0.33	1.38	1	0	0	0	11.49	0	0	5.19	4.64	16.05	2.1	0	0	1	0	0	4	4	8	2	0	10
822	31	35	0	0	24.27	1	0	0	0	0	4.15	7.03	5.52	21	169.55	0.777568	0.56	3.37	0.19	11.17	24.59	18.11	2.54	0.27	0.15	0.27	0.34	0	0	0	0	13.49	0	0	4.89	4.72	15.15	2.25	0	0	0	0	0	9	9	9	1	0	9
823	33	32	0	0	25.74	1	0	0	0	0	3	6.36	5.01	22	153.2	0.62	0.48	3.57	0.67	11.87	22	18.06	2.11	0.26	0.27	0.24	0.67	3	0	0	0	5	0	0	5.01	5.01	16.16	1.97	1	1	1	0	0	15	17	15	2	0	10
824	44	42	0	0	23.77	0	0	1	1	0	3.2	9.08	4.98	27	203.64	0.589321	0.7	1.13	0.29	10.78	22	18.09	2.96	0.26	0.31	0.41	1.54	0	0	1	0	15.58	0	0	5.19	4.86	16.14	1.88	0	0	1	0	0	4	3	6	2	0	8
825	31	41	0	0	22.69	1	0	0	1	0	4.67	7.07	4.54	16	114.73	0.659606	0.52	3.05	0.22	11.21	25.12	18.24	2.4	0.26	0.02	0.27	0.28	1	0	0	0	8.52	0	0	4.94	4.35	15.22	2.42	0	1	1	0	0	7	9	10	1	1	11
826	38	37	0	0	24.12	0	0	0	0	0	3.96	7.69	4.69	22	176.16	0.69887	0.61	2.47	0.21	10.91	22.93	18.13	2.7	0.26	0.12	0.39	0.53	2	0	0	0	14.92	0	0	4.98	4.69	15.35	2.09	0	0	1	0	0	7	6	8	1	1	8
827	38	36	0	0	23.51	0	0	0	0	0	4	8.77	6.26	25	198.72	0.595725	0.67	2.13	0.25	10.95	23.07	18.03	2.77	0.26	0.34	0.33	1.68	3	0	0	0	14.49	1	0	4.92	4.9	16.3	1.92	0	0	0	0	0	5	5	8	2	0	8
828	37	35	0	1	23.35	0	0	0	0	0	3.21	8.3	5.84	26	194.22	0.670042	0.64	2.2	0.26	10.98	23.4	17.99	2.82	0.26	0.37	0.3	1.42	0	0	0	0	14.75	0	0	4.99	4.88	16.03	2	0	1	2	0	0	6	5	7	2	0	9
829	32	31	0	0	23.34	0	0	0	0	1	3.08	7.71	6.38	26	181.93	0.711489	0.59	3.07	0.23	11.08	24.2	17.86	2.72	0.26	0.38	0.23	1.36	1	0	0	0	14.36	0	0	4.75	4.85	16.05	2.09	0	0	2	0	0	8	7	8	2	0	8
830	30	30	0	0	22.12	0	0	0	0	1	4.25	6.88	5.55	20	161.96	0.784848	0.56	3.47	0.2	11.21	24.91	18.12	2.5	0.27	0.17	0.26	0.33	0	0	0	0	12.68	0	0	4.89	4.69	15.13	2.27	0	0	0	0	0	9	9	10	1	1	10
831	31	32	1	0	21.88	1	0	0	0	0	3	7.39	6.51	22	173.13	0.720573	0.66	2.94	0.28	11.4	25.75	18.29	2.55	0.3	0.44	0.26	1.19	1	0	0	0	10.08	0	0	5.18	4.73	15.42	2.23	0	0	1	0	0	7	9	10	2	0	13
832	40	36	1	0	23.67	1	0	0	0	0	4.56	8.06	4.64	22	196.34	0.729819	0.69	1.68	0.27	11.03	23.42	18.4	2.72	0.29	0.19	0.42	0.43	0	0	0	0	13.82	0	0	5.43	4.83	15.02	2.06	0	1	0	0	0	5	5	8	1	0	11
833	38	37	1	0	22.66	1	0	0	0	0	4.24	7.71	4.66	21	176.21	0.709971	0.63	2.26	0.23	10.97	23.32	18.23	2.68	0.27	0.15	0.39	0.49	2	0	0	0	13.9	0	0	5.13	4.71	15.23	2.09	0	0	0	0	0	6	6	8	1	1	9
834	46	43	1	0	19.91	0	0	0	0	0	4.11	9.49	4.74	25	214.4	0.606213	0.78	0.58	0.38	10.97	22.91	18.48	2.94	0.3	0.37	0.43	1.39	1	0	0	0	12.76	0	0	5.77	4.94	15.71	1.89	0	0	0	0	0	1	2	7	2	0	13
835	38	38	1	0	23.47	1	0	0	0	0	3	7.21	4.86	21	167.97	0.698086	0.67	2.77	0.21	11	23.27	18.27	2.62	0.28	0.19	0.36	0.56	1	0	0	0	13.62	0	0	5.05	4.57	15.08	2.11	0	0	0	0	0	7	7	9	1	1	9
836	29	28	1	0	29.88	0	0	0	0	0	4.13	6.7	5.77	21	163.89	0.809637	0.55	3.72	0.18	11.2	24.95	18.05	2.5	0.27	0.21	0.26	0.35	3	0	0	0	13.26	0	0	4.8	4.72	15.15	2.24	0	0	1	0	0	9	10	10	1	1	9
837	40	41	1	0	24.68	1	0	0	1	0	3.22	8.52	5.22	26	180.41	0.607909	0.65	1.78	0.28	10.85	22.77	18.01	2.85	0.26	0.34	0.36	1.51	2	0	0	0	14.13	0	0	5.01	4.77	16.17	1.96	0	1	1	0	0	5	4	7	2	0	8
838	32	35	0	1	29.52	1	1	0	0	0	3	5.66	3.87	18	120.2	0.66	0.48	2.72	0.14	12.17	27.9	17.26	4.11	0.3	0.54	0.32	1.23	0	0	0	0	24	0	0	4.76	4.82	15.26	1.35	0	0	1	0	0	15	10	11	2	0	10
839	32	34	1	0	25.04	1	0	1	0	1	4.23	7	5.14	20	151.92	0.745004	0.57	3.22	0.21	11.11	24.45	18.11	2.53	0.27	0.16	0.31	0.4	0	0	0	0	12.36	0	0	4.88	4.61	15.24	2.22	0	1	1	0	0	8	8	9	1	0	9
840	37	32	1	0	23.85	0	0	0	0	0	3.05	8.18	6.11	28	206.27	0.711394	0.66	2.33	0.26	10.95	23.24	17.93	2.86	0.27	0.45	0.32	1.47	0	0	0	0	16.07	0	0	4.95	4.98	16.04	1.92	0	0	0	0	0	6	5	7	2	0	8
841	30	30	1	0	23.79	1	0	0	0	0	4.82	5.89	6.1	20	155.66	0.795103	0.66	4.3	0.17	11.33	25.17	18.3	2.4	0.3	0.31	0.21	0.44	1	0	0	0	11.83	0	0	4.89	4.5	14.66	2.27	0	0	0	0	0	10	11	11	1	0	10
842	37	43	0	1	23.28	0	1	0	0	1	1	8.19	3.81	35	125.6	0.731611	0.92	2.37	0.15	11.07	21.8	17.16	3.22	0.24	0.2	0.27	2.83	2	0	0	0	10	0	0	4.86	5.06	19.72	2.55	0	0	1	0	0	4	8	15	2	0	8
843	31	29	1	0	22.64	0	0	0	0	0	3.28	7.67	5.1	23	172.32	0.796693	0.47	2.83	0.21	10.94	23.93	17.77	2.69	0.23	0.13	0.37	0.39	2	0	0	0	15.46	0	0	4.72	4.93	15.77	2.11	0	1	1	0	0	8	7	7	1	0	7
844	30	29	1	0	23.59	0	0	0	0	0	3.87	6.66	5.68	22	161.85	0.798871	0.55	3.79	0.17	11.09	24.38	17.95	2.55	0.26	0.23	0.29	0.45	2	0	0	0	14.25	0	0	4.68	4.71	15.3	2.18	0	1	2	0	0	10	9	9	1	0	8
845	34	37	0	0	23.4	0	0	0	0	0	1	10.13	4.75	42	115.9	0.544338	0.91	1.48	0.12	11.57	26.8	17.76	2.57	0.27	0.21	0.27	0.96	2	0	0	0	7	0	0	4.04	4.8	17.06	2.56	0	0	0	0	0	2	3	10	1	0	9
846	34	30	1	0	22.28	0	0	0	0	0	4.12	7.17	5.42	22	183.38	0.797335	0.62	2.97	0.21	11.07	24	18.12	2.64	0.28	0.26	0.35	0.46	0	0	0	0	14.62	0	0	5	4.82	15.15	2.08	0	0	0	0	0	8	8	9	1	0	9
847	36	35	0	0	24.79	0	1	1	0	0	13	9.97	4.92	23	102.1	0.554903	0.2	3.63	0.25	11.57	22.1	18.26	2.31	0.22	0.15	0.48	0.64	2	0	0	0	10	0	0	4.71	5.31	19.69	3.01	1	0	0	0	0	8	7	6	2	0	11
848	38	23	0	0	22.03	1	1	1	1	0	3	4.56	4.33	15	106.4	0.59	0.38	4.1	0.16	11.27	21.6	17.66	3.78	0.34	0.38	0.33	3.46	3	0	0	0	48	0	0	5.01	5.01	16.55	1.82	0	1	1	0	0	17	16	16	2	0	10
849	33	28	0	0	22.64	1	1	1	1	0	4	3.94	3.75	25	67.29	0.55	0.15	5.69	0.19	10.47	22.5	17.26	3.28	0.3	0.2	0.27	0.76	0	0	0	0	14	0	0	4.75	4.91	17.94	3.34	0	0	0	0	0	11	11	12	1	1	10
850	41	38	1	0	26.12	1	0	0	0	0	4.23	8.87	5.35	24	205.47	0.676176	0.75	0.82	0.37	11.13	24.08	18.43	2.83	0.3	0.46	0.37	1.31	1	0	0	0	11.65	0	0	5.67	4.96	15.59	1.95	0	1	1	0	0	3	4	8	2	0	14
851	35	32	1	0	23.82	0	0	0	0	0	4.34	7.3	5.2	21	179.58	0.782695	0.64	2.66	0.24	11.09	24.09	18.21	2.63	0.29	0.26	0.36	0.44	3	0	0	0	13.64	0	0	5.12	4.79	15.1	2.08	0	0	1	0	0	7	7	9	1	0	10
852	36	38	1	0	24.74	1	0	0	0	0	3.56	8.07	5.59	24	168.99	0.658768	0.64	2.16	0.29	11.04	24.03	18.06	2.73	0.27	0.41	0.31	1.4	1	0	0	0	12.09	0	0	5.04	4.76	15.99	2.03	0	1	2	0	0	5	6	8	2	0	10
853	32	28	0	0	23.19	1	1	0	1	1	3	6.11	4.14	16	172.7	1.22	1.14	0.71	0.15	11.07	25.5	17.86	2.3	0.47	0.27	0.27	0.53	1	0	0	0	10	0	0	5	5.08	15.52	1.76	0	0	1	0	0	7	2	19	1	0	10
854	33	35	0	0	20.49	1	0	0	0	0	5	5.97	3.85	85	140	1.07542	1.02	1.87	0.81	9.67	21.7	18.26	2.84	0.23	0.21	0.41	0.18	1	0	0	0	16	0	0	5.31	5.03	17.34	4.51	0	1	1	0	0	12	9	16	2	0	11
855	33	32	1	0	24.31	1	0	0	0	0	4.36	7.04	5.27	21	165.97	0.784398	0.61	2.97	0.23	11.13	24.48	18.17	2.57	0.28	0.26	0.34	0.42	0	0	0	0	12.75	0	0	5.03	4.73	15.12	2.13	0	1	0	0	0	8	8	9	1	0	10
856	33	31	1	0	27.01	0	0	0	0	0	4.15	6.98	5.37	21	169.77	0.792676	0.61	3.13	0.21	11.08	24.21	18.09	2.6	0.28	0.27	0.34	0.47	0	0	0	0	13.75	0	0	4.94	4.75	15.19	2.1	0	0	2	0	0	8	8	9	1	0	9
857	35	37	0	0	22.86	1	1	0	0	0	2	4.56	3.63	31	191.4	1.22	3.12	1.93	0.3	13.27	40.8	17.26	1.75	0.26	0.16	0.3	1.55	0	0	0	0	10	0	0	4.64	4.36	16.95	2.34	1	1	0	0	0	5	6	22	1	0	9
858	39	34	1	0	26.35	0	0	0	0	0	4.7	7.8	4.85	21	195.48	0.775381	0.71	1.76	0.29	11.08	23.85	18.42	2.7	0.3	0.3	0.43	0.44	2	0	0	0	13.29	0	0	5.48	4.87	14.93	2	0	0	0	0	0	5	6	9	1	1	12
859	27	30	1	0	25.14	1	0	0	0	0	3.2	6.93	6.65	24	149.14	0.744055	0.54	3.83	0.23	11.18	25.29	17.77	2.57	0.26	0.46	0.25	1.34	2	0	0	0	12.04	0	0	4.56	4.72	16.07	2.15	0	0	1	0	0	9	9	9	2	0	9
860	29	29	1	0	23.06	0	0	0	0	0	3.97	6.44	5.71	21	152.51	0.812103	0.55	3.91	0.18	11.12	24.71	17.95	2.51	0.27	0.27	0.29	0.46	3	0	0	0	13.38	0	0	4.67	4.68	15.29	2.17	0	1	1	0	0	10	10	10	1	0	8
861	30	32	0	0	20.91	0	0	0	0	1	2	5.26	2.31	22	154.7	1.5	0.77	6.76	0.16	11.67	25.6	16.86	3.87	0.25	0.14	0.34	2.46	2	0	0	0	24	0	0	4.84	4.65	17.08	1.29	1	0	1	0	0	17	18	19	2	0	8
862	36	31	1	0	21.03	0	0	0	0	0	4.12	7.27	5.27	23	187.54	0.79905	0.65	2.69	0.23	11	23.63	18.14	2.69	0.29	0.31	0.4	0.53	2	0	0	1	15	0	0	5.07	4.85	15.17	1.98	0	1	1	0	0	7	7	9	1	1	9
863	42	46	1	0	26.53	0	0	1	0	0	3.41	8.56	4.71	24	162.64	0.573179	0.68	1.41	0.31	10.78	22.58	18.05	2.85	0.26	0.38	0.42	1.59	0	0	0	0	12.67	0	0	5.08	4.67	16.23	1.89	1	0	1	0	0	4	3	7	2	0	9
864	33	29	1	1	25.18	0	0	0	0	0	3.93	6.86	5.57	23	177.09	0.817625	0.61	3.31	0.2	11.02	23.93	18.01	2.63	0.28	0.32	0.35	0.53	1	0	0	0	15.07	0	0	4.85	4.81	15.25	2.03	0	1	2	0	0	9	8	9	1	0	8
865	35	29	0	0	25.31	1	0	0	1	0	2	7.77	4.31	9	180.4	1.05	0.95	1.83	0.15	11.07	23.1	18.26	2.87	0.27	1.95	0.29	2.36	0	0	0	0	16	0	0	5.61	4.86	15.92	2.26	0	0	1	0	0	6	8	13	2	0	15
866	35	32	0	0	23	0	0	0	1	1	1.5	6.5	3.53	13	294.6	0.47	0.5	0.66	0.17	10.67	24.8	17.56	2.46	0.25	0.18	0.58	0.32	1	0	0	0	9	0	0	4.99	4.99	14.31	1.33	0	0	1	0	0	3	2	5	1	0	10
867	41	40	1	1	22.96	0	1	0	1	0	3	7.05	3.84	36	184.2	0.45587	0.19	1.37	0.36	10.57	21.4	18.36	3.24	0.54	0.16	0.26	2.57	3	0	0	0	25	0	0	4.66	3.93	16.45	1.62	0	1	1	0	0	4	3	9	2	0	8
868	34	30	1	0	20.29	1	0	0	1	0	2.95	7.59	6.41	27	190.66	0.751278	0.64	2.93	0.25	10.96	23.67	17.8	2.8	0.27	0.54	0.3	1.52	1	0	0	0	15.63	0	0	4.76	4.95	16.11	1.89	0	0	1	0	0	8	7	8	2	0	8
869	40	36	0	0	23.69	0	1	0	1	0	3	7.06	5.44	15	144.6	0.18	0.24	1.02	0.15	10.47	20.7	18.96	2.11	0.26	0.18	0.26	0.9	3	0	0	0	7	0	0	4.43	4.81	13.8	1.27	0	0	1	0	0	2	3	4	2	0	8
870	41	50	1	0	23.98	0	0	0	0	0	4.29	7.67	3.45	18	120.06	0.585684	0.62	1.93	0.26	10.75	22.6	18.17	2.65	0.25	0.12	0.49	0.68	0	0	0	0	11.01	0	0	4.99	4.35	15.59	2.04	0	0	0	0	0	5	5	9	1	0	8
871	34	35	0	0	23.34	0	1	1	0	1	4	3.46	18.47	16	126.1	1.4	0.9	5.18	0.19	10.17	20.1	18.06	2.99	0.32	0.24	0.26	5.76	3	0	0	0	30	0	0	4.76	4.63	17.09	3.29	0	1	0	0	0	12	22	17	1	0	9
872	31	38	0	1	22.26	0	0	0	0	1	1	6.27	6.1	16	94.66	1.21	0.56	4.38	0.17	11.07	20.3	17.86	2.75	0.22	0.14	0.91	1.01	0	0	0	0	25	0	0	4.6	4.96	15.37	1.62	0	0	0	0	0	7	7	11	1	0	4
873	41	35	0	1	17.76	0	0	0	0	0	1	6.56	6.21	17	274.5	0.39	0.47	1.9	0.16	11.67	21.7	16.66	3.41	0.26	0.18	0.21	3.13	1	0	0	0	15	0	0	5.71	4.38	16.1	1.37	0	0	0	0	0	2	4	6	2	0	10
874	44	43	1	0	23.47	1	0	0	0	0	4.01	9.03	3.37	21	180.49	0.679344	0.64	0.35	0.33	10.71	22.36	18.19	2.89	0.26	0.17	0.59	0.55	1	0	0	0	13.82	0	0	5.45	4.91	15.68	1.85	0	0	0	0	0	2	2	7	1	0	10
875	36	35	1	0	22.96	0	0	0	0	0	4.05	8.19	4.52	21	181.09	0.793548	0.58	1.52	0.3	10.97	24.04	18.11	2.74	0.27	0.25	0.47	0.38	2	0	0	0	13.34	0	0	5.28	5	15.48	1.98	0	0	1	0	0	5	5	8	1	0	11
876	36	32	0	0	24.04	1	1	0	0	1	2	5.55	2.23	13	118.1	1.06	0.75	2.6	0.17	10.77	22.7	18.16	2.69	0.29	0.24	0.24	0.92	2	0	0	0	14	0	0	4.7	5	7.7	2.91	0	1	2	0	0	8	6	15	1	0	9
877	33	36	1	0	23.22	1	0	0	0	0	3.1	7.39	5.93	25	151.92	0.688563	0.6	3.04	0.25	10.95	23.95	17.79	2.7	0.25	0.48	0.3	1.53	0	0	0	0	12.97	0	0	4.65	4.71	16.23	1.97	0	1	2	0	0	7	7	8	2	0	8
878	31	29	1	0	26.34	0	0	0	0	0	3.95	6.52	5.65	22	161.3	0.826769	0.59	3.64	0.2	11.05	24.32	17.95	2.57	0.27	0.35	0.34	0.54	3	0	0	0	14.11	0	0	4.75	4.75	15.29	2.05	0	1	1	0	0	9	9	10	1	0	8
879	25	28	1	1	24.17	1	0	0	1	0	8	2.7	15.39	22	75.32	0.788125	1.95	6.64	0.32	12.93	28.07	20.28	2.92	0.72	2	0.28	2.86	0	0	0	0	3.86	0	0	3.98	2.68	9.21	2.55	0	0	1	0	0	27	40	8	2	0	10
880	36	34	1	0	22.27	1	0	0	0	0	3.47	7.85	5.95	25	183.13	0.725451	0.68	2.25	0.3	11.01	23.98	18.01	2.78	0.28	0.56	0.34	1.48	0	0	0	0	13.34	0	0	5.05	4.9	15.95	1.89	0	0	1	0	0	6	6	8	2	0	10
881	31	34	1	0	21.98	1	0	0	0	0	3.4	7.36	4.68	21	138.67	0.767654	0.47	2.86	0.23	10.87	24	17.73	2.64	0.23	0.19	0.41	0.49	2	0	0	0	13.38	0	0	4.64	4.76	15.91	2.06	0	0	1	0	0	7	7	10	1	0	8
882	34	36	1	0	24.32	1	0	1	0	0	4.5	6.41	5.19	20	142.89	0.755399	0.66	3.42	0.22	11.06	24.15	18.17	2.52	0.29	0.35	0.36	0.6	2	0	0	0	11.97	0	0	4.89	4.51	15.09	2.07	0	1	1	0	0	8	9	11	1	0	9
883	27	29	1	0	25.61	1	0	0	0	0	4.6	5.68	6.03	19	134.66	0.835852	0.61	4.41	0.19	11.29	25.68	18.1	2.37	0.29	0.39	0.25	0.45	0	0	0	0	10.84	0	0	4.74	4.53	14.94	2.21	0	0	0	0	0	11	11	22	1	0	10
884	37	31	1	0	24.4	0	0	0	0	0	5.5	2.51	14.74	28	133.28	0.75724	2.09	6.09	0.58	12.54	25.26	20.33	2.49	0.73	2.06	0.25	3.15	2	0	0	0	9.2	0	0	4.28	2.46	9.34	2.16	0	0	1	0	0	35	36	10	2	0	8
885	32	34	1	0	30.65	0	0	0	0	0	4.24	6.63	5.16	20	141.85	0.77923	0.6	3.31	0.23	11.05	24.45	18.04	2.54	0.27	0.32	0.36	0.53	0	0	0	0	12.04	0	0	4.84	4.62	15.29	2.08	0	1	0	0	0	8	8	10	1	0	9
886	29	28	1	0	23.53	0	0	0	0	0	4.31	6.35	5.77	20	154	0.850767	0.6	3.68	0.22	11.19	25.21	18.05	2.5	0.28	0.39	0.31	0.44	2	0	0	0	12.26	0	0	4.86	4.73	15.12	2.11	0	0	2	0	0	9	10	8	1	0	10
887	39	34	1	0	18.93	0	0	0	0	0	3.35	8.1	5.86	27	200.16	0.730605	0.72	1.88	0.31	10.91	23.26	18.01	2.88	0.29	0.6	0.4	1.57	2	0	0	0	14.91	0	0	5.13	4.99	15.98	1.76	0	0	1	0	0	5	5	10	2	0	10
888	31	31	1	0	20.1	1	0	0	0	0	4.18	6.49	5.46	20	150.04	0.815213	0.6	3.5	0.22	11.08	24.61	18.02	2.54	0.28	0.36	0.35	0.52	3	0	0	0	12.67	0	0	4.82	4.69	15.25	2.06	0	0	2	0	0	9	9	12	1	0	11
889	41	31	0	1	28.54	1	1	0	1	0	4	4.81	5.34	10	232	0.78	0.78	2.21	0.28	10.37	20.2	17.36	2.89	0.24	0.2	0.27	0.34	1	0	0	0	5	0	0	4.73	9.35	22.04	0.02	1	1	0	0	0	5	8	6	1	0	11
890	35	34	0	0	24.3	1	1	0	0	0	9	7.11	5.11	15	125.6	1.46	0.96	2.36	0.17	11.27	21.3	17.76	3.6	0.27	0.19	0.39	2.07	1	0	0	0	7	0	0	5.39	5.27	16.32	2.96	0	1	1	0	0	3	6	15	1	0	10
891	28	26	0	0	19.12	1	1	1	0	0	2	5.69	3.03	37	144.3	1.15218	1.56	6.17	0.23	11.57	33.1	19.06	2.43	0.25	0.33	0.27	2.4	0	0	0	0	22	0	0	4.79	4.28	14.54	2.88	0	0	2	0	0	13	15	8	1	0	10
892	34	37	0	0	23.49	0	1	0	0	0	1	7.43	4.86	9	101.3	0.532917	0.71	2.37	0.05	13.17	34.9	20.06	1.78	0.3	0.22	0.36	0.42	2	0	0	0	6	0	0	5.58	4.16	13.2	3.69	1	1	1	0	0	5	5	15	1	1	15
893	33	40	0	1	30.62	0	1	0	1	1	6	5.21	5.37	20	250.7	0.36	0.95	3.46	0.14	11.27	22.7	18.46	2.26	0.26	0.16	0.28	2.8	1	0	0	1	6	0	0	4.58	5.18	17.78	2.16	0	0	1	0	0	1	8	11	2	0	10
894	31	38	1	1	22.01	1	0	1	0	0	3.74	6.13	6.37	23	121.45	0.679084	0.67	4.17	0.23	11.1	24.62	17.93	2.51	0.28	0.59	0.22	1.62	1	0	0	0	10.5	0	0	4.54	4.38	15.83	2.05	0	1	1	0	0	9	10	7	2	0	8
895	41	39	1	0	30.83	1	0	0	0	0	3.17	8.17	5.38	27	184.22	0.674625	0.72	1.76	0.31	10.76	22.56	17.94	2.91	0.27	0.57	0.44	1.68	2	0	0	0	14.88	0	0	5.02	4.87	16.2	1.72	0	1	1	0	0	5	4	8	2	0	8
896	44	44	0	0	25.96	0	0	0	0	0	4.43	7.9	3.85	21	165.66	0.682392	0.73	1.34	0.3	10.76	22.37	18.29	2.78	0.29	0.32	0.56	0.73	0	0	0	0	13.18	0	0	5.33	4.67	15.34	1.82	0	0	1	0	0	4	4	14	1	0	10
897	39	46	0	0	22.29	0	1	1	0	0	1	6.06	1.81	16	162.9	0.8	0.38	0.91	0.19	10.37	22.1	18.36	2.21	0.26	0.16	0.28	0.23	1	0	0	0	4	0	0	4.62	5.13	16.35	1.27	0	0	1	0	0	2	3	12	2	0	10
898	35	28	0	0	23.07	1	1	0	0	0	8	3.31	4.65	21	584.1	1.21966	1.72	3.79	0.25	10.73	25.1	18.56	2.65	0.26	0.21	0.25	0.22	0	0	0	0	4	0	0	5.34	5.07	16.7	2.79	0	0	1	0	0	10	11	10	1	0	11
899	32	31	0	0	32.33	1	0	0	0	0	4.35	6.57	5.41	20	155.05	0.827962	0.63	3.22	0.24	11.1	24.67	18.09	2.56	0.29	0.41	0.37	0.52	0	0	0	0	12.37	0	0	4.96	4.73	15.17	2.01	0	0	1	0	0	8	9	18	1	0	10
900	37	29	0	0	22.44	1	0	0	1	1	2	8.73	6.6	27	141.2	1.11	0.94	2.52	0.15	11.17	21.6	17.26	2.94	0.27	0.79	0.25	3.11	1	0	0	0	12	0	0	4.79	4.71	13.91	1.12	0	0	1	0	0	4	6	14	1	0	11
901	34	31	0	0	22.23	1	1	0	1	1	8	4.17	7.82	42	96.31	0.733444	0.88	6.52	0.23	11.87	23.9	18.16	2.05	0.54	0.22	0.28	0.18	3	0	0	0	7	0	0	4.76	2.49	5.09	2.38	0	1	2	0	0	18	13	4	1	0	10
902	41	38	0	0	19.98	0	0	0	0	1	3	8.06	3.84	51	151.4	0.860195	0.65	1.58	0.56	11.17	21	17.96	3.22	0.36	0.15	0.32	0.36	3	0	0	0	8	0	0	4.71	5.27	17.19	2.12	0	0	2	0	0	5	4	8	2	0	10
903	38	37	0	0	23.63	1	0	0	0	0	3.7	7.94	5.61	24	176.68	0.713378	0.72	1.82	0.34	10.98	23.88	18.09	2.8	0.29	0.62	0.4	1.53	3	0	0	0	12.3	0	0	5.2	4.87	15.93	1.81	0	0	1	0	0	5	5	22	2	0	11
904	31	30	0	0	23.33	1	0	0	1	1	6	7.22	4.55	20	208.7	0.65	1.47	1.92	0.19	11.07	24.9	18.06	2.2	0.29	0.16	0.29	2.56	1	0	0	0	13	0	0	4.47	4.17	14.21	1.92	0	0	1	0	0	6	6	9	1	0	10
905	35	36	0	0	22.72	1	0	0	0	0	3.26	7.45	5.85	25	159.58	0.714598	0.66	2.65	0.29	10.92	23.81	17.85	2.75	0.27	0.6	0.36	1.59	0	0	0	0	12.99	0	0	4.82	4.78	16.16	1.84	0	0	1	0	0	6	6	7	2	0	11
906	28	27	0	1	21.04	1	0	0	1	1	3	7.24	3.86	15	208.57	0.965625	0.57	0.51	0.27	10.37	26.1	18.76	2.62	0.23	0.51	0.3	0.19	3	0	0	0	7	0	0	4.52	5.33	18.19	2.45	0	1	0	0	0	5	5	9	1	0	11
907	28	25	0	0	23.77	0	0	1	0	0	2.99	6.64	7.07	26	169.81	0.835753	0.61	3.9	0.24	11.09	24.91	17.67	2.67	0.27	0.7	0.26	1.51	0	0	0	0	14.27	0	0	4.55	4.93	16.07	1.9	0	1	1	0	0	9	9	16	2	0	8
908	29	28	0	1	20.1	1	1	0	1	0	5	5.94	7.5	16	166.62	0.922244	0.8	5.37	0.1	11.51	25.77	17.81	2.21	0.23	0.16	0.31	2.35	0	0	0	0	9	0	0	4.72	5.08	16.81	1.31	0	0	1	0	0	10	15	10	1	0	11
909	33	30	0	0	23.55	0	1	0	1	0	2	1.08	2.51	20	262	0.99	0.21	2.7	0.78	10.47	22.2	17.96	4.11	0.26	0.21	0.31	0.31	1	0	0	0	30	0	0	5.49	4.92	16.47	1.78	0	0	1	0	0	6	5	11	1	0	10
910	44	48	0	0	24.79	0	1	0	0	0	2	9.07	6.86	26	71.93	0.28	1.11	1.03	0.15	12.27	25.9	17.56	2.58	0.25	0.16	0.37	0.57	0	0	0	0	4	0	0	4.57	4.93	17.16	1.17	0	0	1	0	0	4	2	11	2	0	9
911	25	25	0	0	25.28	1	0	0	0	0	4.2	5.67	6.2	20	137.75	0.899245	0.57	4.44	0.2	11.23	25.83	17.91	2.42	0.28	0.48	0.28	0.46	2	0	0	0	11.78	0	0	4.64	4.7	15.18	2.11	0	0	1	0	0	11	11	9	1	1	10
912	33	32	0	0	20.12	1	0	0	0	0	3.19	7.17	6.27	25	165.59	0.764383	0.66	3.01	0.28	10.97	24.15	17.8	2.74	0.27	0.66	0.34	1.58	3	0	0	0	13.52	0	0	4.76	4.86	16.12	1.83	0	0	1	0	0	7	7	12	2	0	11
913	31	31	0	1	23.11	1	1	1	0	0	5	6.87	13.47	21	166.7	1.31149	0.86	7.49	0.15	12.27	24.1	17.26	3.71	0.32	0.15	0.38	0.53	0	1	0	0	15	0	0	4.95	4.11	14.28	3.36	0	0	1	0	0	19	18	10	2	0	11
914	27	24	1	0	22.6	0	0	0	0	0	3.7	6.69	7.13	24	171.21	0.867501	0.65	3.5	0.29	11.31	26.11	17.93	2.59	0.3	0.75	0.24	1.34	2	0	0	0	11.55	0	0	4.91	4.97	15.72	1.96	0	0	1	0	0	8	9	13	2	0	12
915	31	38	0	1	23.85	0	0	1	0	0	1	6.71	6.41	25	171.8	0.45	0.6	3.19	0.21	10.89	22.91	18	3.01	0.39	0.21	0.36	0.34	1	0	0	0	20	0	0	4.81	4.51	18.24	2.61	1	0	1	0	0	12	6	12	2	0	9
916	38	39	0	0	23.65	1	1	0	0	0	10	14.19	3.39	8	261.3	0.53	0.43	2.38	0.11	11.47	26.5	17.76	2.84	0.21	0.13	0.31	1.56	1	0	0	0	6	0	0	4.26	4.41	15.16	2.41	0	0	1	0	0	3	6	11	1	0	11
917	35	34	1	0	23.8	0	0	0	1	0	4.63	6.3	5.32	20	152.79	0.80893	0.72	3.22	0.25	11.05	24.19	18.2	2.56	0.31	0.5	0.41	0.67	2	0	0	0	12.23	0	0	5.03	4.63	15	1.92	1	0	1	0	0	8	8	9	1	0	10
918	34	33	1	0	22.38	0	0	0	1	0	3.29	7.26	6.14	25	166.1	0.759986	0.67	2.79	0.29	10.96	24.1	17.85	2.75	0.28	0.68	0.36	1.59	1	0	0	0	13.23	0	0	4.84	4.86	16.09	1.8	0	0	1	0	0	7	7	9	2	0	11
919	31	28	1	0	23.62	1	0	0	1	0	3.21	6.93	6.69	26	172.13	0.816132	0.66	3.29	0.27	11.05	24.62	17.78	2.72	0.28	0.72	0.31	1.54	3	0	0	0	13.74	0	0	4.75	4.94	16.03	1.82	0	0	1	0	0	8	8	21	2	0	9
920	27	23	0	1	25.44	1	1	0	0	1	3	6.7	5.39	17	202.2	0.68	0.45	4.57	0.15	11.37	28.2	18.36	2.53	0.31	0.37	0.35	0.44	2	0	0	0	7	0	0	5.19	4.99	13.25	2.92	1	0	1	1	0	8	11	10	2	0	12
921	33	27	1	1	22.98	1	0	0	0	0	2.52	6.6	5.71	21	178.45	0.89671	0.7	2.94	0.27	11.14	24.81	18.17	2.61	0.31	0.56	0.41	0.53	2	0	0	0	13.12	0	0	5.17	4.92	14.98	1.88	0	1	1	0	0	8	8	14	1	0	12
922	37	36	0	0	24.1	0	1	0	1	1	3	5.43	3.8	24	132.7	0.81156	0.64	1.12	0.25	10.37	21	17.06	3.67	0.26	0.22	0.29	6.67	0	0	0	0	21	0	0	5.2	5.05	18.31	2.21	0	0	1	0	0	3	9	11	2	0	10
923	35	35	1	0	22.58	1	0	0	0	0	3	6.19	5.25	21	145.35	0.798003	0.71	3.36	0.24	10.99	23.95	18.12	2.57	0.3	0.51	0.42	0.73	2	0	0	0	12.48	0	0	4.91	4.59	15.11	1.9	0	0	1	0	0	8	8	13	1	0	11
924	36	32	0	0	19.21	0	1	1	0	0	2	5.5	2.67	41	183	0.84	1.63	1.53	0.16	11.87	28.1	18.16	2.99	0.33	0.15	0.29	2.64	2	0	0	0	14	0	0	5.71	4.84	14.68	1.58	0	0	1	0	0	3	7	10	1	0	13
925	39	45	1	0	21.23	0	0	0	0	0	4.78	7.18	3.93	17	124.02	0.695217	0.69	1.93	0.31	10.91	23.75	18.28	2.6	0.28	0.37	0.51	0.66	2	0	0	0	9.49	0	0	5.22	4.49	15.3	1.92	0	1	1	0	0	5	6	13	1	0	11
926	36	30	0	0	22.71	0	0	0	1	0	3	7	7.39	31	196.7	0.901333	0.77	3.16	0.58	12.47	32.8	16.26	3.17	0.3	0.14	0.36	3.32	1	0	0	0	25	0	0	5.28	4.46	15.12	1.19	0	0	1	0	0	4	7	9	2	0	15
927	32	30	1	0	23.19	1	0	0	0	0	3.43	7.03	6.46	25	167.66	0.803725	0.68	2.99	0.3	11.06	24.71	17.86	2.71	0.29	0.74	0.33	1.54	1	0	0	0	12.74	0	0	4.87	4.91	15.98	1.81	0	0	1	0	0	7	8	9	2	0	10
928	30	32	1	0	23.04	1	0	0	0	0	3.1	6.67	6.4	24	142.26	0.771628	0.62	3.6	0.26	10.98	24.56	17.68	2.66	0.26	0.69	0.31	1.6	0	0	0	0	12.58	0	0	4.54	4.75	16.23	1.86	0	0	1	0	0	8	8	10	2	0	8
929	31	31	0	0	24	1	0	0	1	0	2	5.55	4.25	29	103.9	0.82	1.01	1.9	0.2	11.04	26.28	18.13	2.41	0.24	0.18	0.29	0.99	1	0	0	0	6	0	0	4.81	4.66	15.91	2.69	0	0	1	0	0	5	4	9	1	0	10
930	35	33	1	0	23.61	0	0	0	0	0	3.47	7.33	6.1	25	170.9	0.773479	0.71	2.52	0.32	10.98	24.16	17.92	2.77	0.29	0.73	0.38	1.59	0	0	0	0	12.92	0	0	4.97	4.9	16.01	1.75	0	1	1	0	0	6	6	10	2	0	10
931	34	29	1	0	19.58	1	0	0	0	0	4.29	6.54	5.52	22	170.91	0.875969	0.69	3	0.26	11.02	24.25	18.07	2.64	0.3	0.56	0.44	0.64	1	0	0	0	13.73	0	0	5.04	4.87	15.15	1.82	0	0	1	0	0	8	8	11	1	0	10
932	26	26	1	0	23.32	1	0	0	0	0	4.03	5.56	6.1	20	133.4	0.900116	0.58	4.46	0.2	11.13	25.39	17.82	2.45	0.28	0.54	0.33	0.58	0	0	0	0	12.35	0	0	4.55	4.7	15.3	2.01	0	0	1	0	0	11	11	9	1	0	9
933	35	32	1	0	24.84	1	0	1	1	0	3.8	6.47	5.28	23	158.46	0.831922	0.66	3.26	0.23	10.83	23.33	17.88	2.69	0.28	0.52	0.47	0.79	1	0	0	0	15.01	0	0	4.75	4.77	15.46	1.77	0	0	1	0	0	8	7	9	1	0	8
934	38	35	0	0	25.33	0	1	0	0	0	2	6.29	4.6	8	181	1.27	1.11	7.89	0.23	11.07	24.4	18.06	2.2	0.26	0.3	0.29	0.33	2	0	0	0	17	0	0	4.83	5.12	16.66	1.05	0	0	1	0	0	12	12	12	1	1	11
935	32	30	1	0	23.32	0	0	0	0	0	3.25	6.91	6.49	25	164.86	0.805749	0.67	3.15	0.29	11	24.45	17.78	2.73	0.28	0.76	0.35	1.6	1	0	0	0	13.33	0	0	4.76	4.9	16.07	1.77	0	0	1	0	0	8	8	10	2	0	11
936	34	40	1	0	23.08	1	0	0	0	0	5.14	6.13	4.8	17	113.98	0.761512	0.71	3.06	0.29	11.13	24.98	18.32	2.44	0.31	0.49	0.41	0.61	0	0	0	0	8.2	0	0	5.11	4.41	14.96	2.01	0	1	1	0	0	7	9	13	1	0	12
937	29	30	1	0	21.71	1	0	0	0	0	3.28	6.55	6.59	24	145.33	0.805327	0.63	3.61	0.28	11.06	25.04	17.73	2.63	0.27	0.74	0.3	1.56	0	0	0	0	12.03	0	0	4.63	4.8	16.1	1.86	0	0	1	0	0	8	9	14	2	0	11
938	30	36	0	0	19.72	1	0	0	1	1	4	6.18	6.28	20	243.5	0.53	0.47	6.84	0.19	11.67	24.7	18.76	2.96	0.27	0.24	0.26	0.39	1	0	0	0	6	0	0	4.64	5.11	15.21	1.16	1	1	1	0	0	8	10	11	1	0	11
939	32	28	0	0	24.92	0	0	0	0	1	4	6.89	4.85	13	105.4	0.95	0.45	2.51	0.34	10.87	22.9	17.46	3	0.26	0.38	0.32	1.26	1	0	0	0	12	0	0	5.02	5.73	19.07	1.55	1	0	1	0	0	3	2	9	2	0	9
940	30	30	1	0	25.31	1	0	0	0	0	4.41	5.5	5.88	20	135.15	0.864782	0.67	4.2	0.22	11.09	24.86	18	2.47	0.3	0.59	0.36	0.69	0	0	0	0	12.02	0	0	4.72	4.6	15.09	1.93	0	0	1	0	0	10	10	14	1	0	9
941	32	31	1	0	24.28	1	0	0	0	0	3.45	6.91	6.38	24	159.53	0.802679	0.68	3.01	0.31	11.04	24.72	17.85	2.7	0.29	0.77	0.35	1.57	1	0	0	0	12.28	0	0	4.85	4.88	16.01	1.78	0	0	1	0	0	7	8	10	2	0	10
942	34	32	0	0	20.2	0	1	0	0	0	5	6.93	10.71	16	93.79	1.03	1.53	1.94	0.18	12.07	27.4	17.16	1.85	0.3	1.13	0.57	3.8	0	0	0	0	6	0	0	4.99	5.11	17.2	1.09	1	0	1	0	0	5	10	9	2	0	10
943	31	27	1	0	25.37	1	0	0	0	0	3.55	6.84	6.75	25	174.06	0.853309	0.7	3.06	0.31	11.12	25.12	17.89	2.7	0.3	0.83	0.33	1.52	2	0	0	0	12.63	0	0	4.94	4.99	15.86	1.77	0	0	1	0	0	7	8	10	2	0	11
944	38	27	1	0	23.25	1	0	1	0	0	3.84	6.78	5.59	26	201.54	0.903256	0.75	2.73	0.26	10.81	22.94	17.97	2.82	0.3	0.66	0.53	0.83	2	0	0	0	17.39	0	0	5.02	5.06	15.27	1.59	0	0	1	0	0	8	7	13	1	0	8
945	34	27	1	0	24.14	0	0	0	0	0	4.06	6.38	5.72	23	176.92	0.905383	0.7	3.2	0.25	10.95	23.97	17.97	2.68	0.3	0.63	0.46	0.72	1	0	0	0	15.01	0	0	4.94	4.93	15.22	1.73	1	0	1	0	0	8	8	10	1	0	9
946	36	36	0	0	24.85	1	1	0	0	0	7	6.88	3.5	25	102.4	0.43	1.35	3.59	0.17	10.67	20.5	18.16	2.66	0.24	0.14	0.28	1.24	1	0	0	0	9	0	0	4.74	4.96	16.36	0.95	1	1	1	0	0	8	5	8	2	0	10
947	28	27	0	0	21.72	1	1	0	0	0	5	7.02	9.86	33	108.5	0.8	1.66	5.61	0.16	10.87	21.5	18.86	2.51	0.29	0.24	0.3	1.81	2	0	0	0	10	0	0	4.24	4.75	17.63	2.57	0	0	1	0	0	3	4	9	2	0	8
948	41	41	1	0	21.81	1	0	0	0	0	3.59	7.85	5.19	25	164.6	0.698991	0.76	1.56	0.36	10.79	23.1	18.01	2.87	0.29	0.73	0.5	1.74	0	0	0	0	12.48	0	0	5.15	4.83	16.12	1.62	0	0	0	0	0	4	4	11	2	0	10
949	42	39	1	0	24.66	0	0	0	0	0	4.08	8.12	5.28	24	184.05	0.735082	0.82	1	0.4	10.93	23.65	18.24	2.87	0.31	0.79	0.5	1.63	2	0	0	0	11.68	0	0	5.52	4.95	15.81	1.61	0	0	1	0	0	3	4	11	2	0	13
950	35	35	0	1	22.23	1	0	0	0	0	4.11	5.86	5.3	22	137.33	0.810236	0.7	3.7	0.22	10.85	23.44	17.94	2.6	0.29	0.59	0.46	0.89	1	0	0	0	13.59	0	0	4.68	4.57	15.32	1.78	0	0	1	0	0	9	8	12	1	0	7
951	30	27	0	0	22.61	1	0	0	0	0	4.1	5.88	5.87	21	150.16	0.907301	0.65	3.82	0.24	11.04	24.75	17.9	2.56	0.29	0.62	0.41	0.67	0	0	0	0	13.25	0	0	4.76	4.8	15.26	1.84	0	0	0	0	0	9	9	20	1	0	9
952	41	38	0	0	19.12	0	0	0	1	0	2	9.1	7.23	4	245.3	1	0.61	0.95	0.16	10.87	21.5	18.16	2.97	0.23	0.14	4.09	1.09	1	0	0	0	12	0	0	4.71	5.39	17.43	2.08	0	0	1	0	0	5	5	16	1	0	9
953	34	33	0	0	22.84	0	1	1	0	0	2	6.11	9.54	11	165.6	0.85	0.24	5.38	0.15	10.87	24.5	17.96	3.26	0.23	0.14	0.36	2.34	2	0	0	0	30	0	0	4.43	5.39	21.1	0.22	1	1	1	0	0	10	12	8	1	0	8
954	29	27	0	0	23.84	1	0	0	0	0	1	5.53	4.14	14	167.9	0.97	0.95	1.43	0.16	10.77	21.4	18.36	2.12	0.23	0.16	0.26	0.42	3	0	0	0	18	0	0	4.82	5.31	18.65	1.64	0	0	1	0	0	6	6	8	1	0	10
955	42	41	0	0	23.86	0	0	0	0	0	3.49	7.88	5.16	25	168.9	0.702872	0.78	1.5	0.36	10.73	22.78	17.98	2.9	0.29	0.76	0.52	1.79	0	0	0	0	13.19	0	0	5.14	4.86	16.16	1.55	0	0	0	0	0	4	4	8	2	0	10
956	44	42	0	0	22.17	0	0	0	0	0	3.58	8.12	5	25	176.87	0.695391	0.81	1.12	0.38	10.71	22.53	18.05	2.95	0.3	0.77	0.55	1.81	2	0	0	0	13.36	0	0	5.27	4.89	16.12	1.51	0	0	1	0	0	3	3	11	2	0	10
957	39	37	0	0	23.63	1	0	0	0	0	3.34	7.5	5.63	26	169.12	0.746336	0.75	2.07	0.34	10.79	23.18	17.88	2.86	0.29	0.8	0.48	1.77	1	0	0	0	13.66	0	0	4.99	4.89	16.16	1.58	0	0	1	0	0	5	5	3	2	0	9
958	31	30	0	0	23.44	1	0	0	0	1	5	6.21	5.85	17	142.7	0.58	0.56	2.04	0.16	11.07	26.3	18.66	2.29	0.24	0.14	0.28	0.94	0	0	0	0	9	0	0	4.5	4.56	17.51	1.79	0	0	1	0	0	5	3	10	2	0	11
959	35	30	0	0	25.59	0	0	0	0	1	4	6.83	2.92	16	86.31	1.01	0.36	1.59	0.19	10.17	23.4	18.16	2.47	0.23	0.14	0.28	1.17	0	0	0	0	20	0	0	4.98	4.45	15.67	2.16	0	0	1	0	0	6	5	20	1	0	10
960	31	31	0	0	23.28	0	0	0	0	0	3.65	6.7	6.41	23	150.07	0.820107	0.69	3.06	0.32	11.09	25.17	17.88	2.66	0.29	0.83	0.35	1.57	0	0	0	0	11.07	0	0	4.89	4.85	15.96	1.77	0	0	0	0	0	7	8	20	2	0	11
961	30	31	0	0	23.49	1	0	0	1	0	5	7.27	9.29	15	238.9	0.731407	0.98	5.34	0.16	11.27	26.2	17.86	2.29	0.28	0.14	0.32	0.64	0	0	0	0	15	0	0	4.51	4.76	16.38	1.25	1	0	1	0	0	9	10	8	1	0	10
962	35	30	0	0	23.85	1	1	0	0	0	3	5.4	3.75	21	130.8	0.84	0.99	3.09	0.17	10.97	23.4	17.76	2.43	0.25	0.19	0.44	0.72	0	0	0	0	10	0	0	5.1	5.07	15.38	1.12	0	0	1	0	0	7	8	16	1	1	9
963	43	37	1	0	23.69	1	0	0	0	0	3.86	7.18	5.16	27	214	0.886189	0.82	1.98	0.29	10.67	22	18.03	2.94	0.31	0.72	0.63	0.96	0	0	0	0	18.32	0	0	5.2	5.12	15.3	1.42	0	0	0	0	0	6	5	10	1	0	8
964	30	30	0	0	22.99	1	0	0	1	1	4	6.49	3.6	20	172.1	0.21	0.65	1.35	0.16	11.17	24.2	18.56	3.34	0.28	0.24	0.38	5.33	1	0	0	0	16	0	0	5.47	5.55	15.31	3.2	0	0	1	0	0	2	10	19	2	0	14
965	34	32	0	0	23.86	0	1	0	0	1	2	9.12	3.19	19	184.4	0.590004	1.08	1.83	0.15	10.57	24.9	17.66	2.3	0.23	0.19	0.34	2.36	1	0	0	0	20	0	0	4.57	5.06	14.95	1.43	0	0	1	0	0	4	5	9	2	0	10
966	24	28	0	0	28.78	1	1	1	0	0	2	4.42	6.19	12	163.1	1.98	0.57	12.02	0.25	14.07	30.6	10.86	2.6	0.23	0.15	0.29	0.86	2	0	0	0	22	0	0	4.3	4.43	13.79	1.81	0	1	2	0	0	35	40	14	2	0	9
967	39	42	1	0	24.2	1	0	0	0	0	3.63	7.47	5.18	23	142.65	0.700393	0.74	1.9	0.36	10.81	23.51	17.95	2.8	0.28	0.77	0.49	1.76	0	0	0	0	11.13	0	0	5.04	4.73	16.18	1.63	0	0	0	0	0	4	5	10	2	0	10
968	30	30	0	0	23.25	1	1	0	1	1	4	9.93	5.09	12	225.9	0.46	0.61	1.24	0.14	11.07	23.2	18.86	2.29	0.26	0.2	0.23	0.67	0	0	0	0	19	0	0	4.84	4.9	16.98	0.78	0	0	1	0	0	5	6	15	1	0	10
969	30	29	1	0	23.6	1	0	0	0	0	3.07	6.35	6.67	25	148.7	0.837307	0.66	3.68	0.28	10.95	24.57	17.62	2.7	0.28	0.87	0.36	1.7	0	0	0	0	13.25	0	0	4.55	4.86	16.2	1.7	0	0	1	0	0	9	8	10	2	0	8
970	32	30	0	0	26.18	1	0	1	1	0	6	8.23	5.47	18	177.5	0.4	0.92	2.99	0.15	11.17	25.1	18.56	2.44	0.23	0.15	0.27	2.38	2	0	0	0	9	0	0	3.94	4.73	16.16	1.75	0	0	1	0	0	6	7	10	2	0	13
971	30	26	0	0	22.53	1	1	0	1	1	2	3.03	0.21	14	50.32	0.35	0.32	1.71	0.1	12.87	31.4	17.86	1.46	0.25	1.15	0.28	1.82	1	0	0	0	5	0	0	4.81	4.55	13.31	2.43	0	0	1	0	0	3	6	10	2	0	9
972	34	31	1	0	21	1	0	0	0	0	4.15	6.15	5.38	22	150.75	0.879622	0.7	3.21	0.27	10.91	24.03	17.95	2.64	0.3	0.67	0.49	0.79	2	0	0	0	13.37	0	0	4.88	4.79	15.33	1.71	0	0	0	0	0	8	8	4	1	0	9
973	34	33	1	0	24.79	1	0	0	0	0	4.11	6.11	5.22	21	139.86	0.855477	0.69	3.27	0.27	10.87	23.93	17.91	2.63	0.29	0.64	0.5	0.82	0	0	0	0	12.97	0	0	4.81	4.72	15.41	1.72	0	0	1	0	0	8	8	10	1	0	9
974	30	29	0	0	23.45	1	0	0	0	0	4	8.89	2.89	16	113.4	0.9	0.86	1.52	0.14	10.77	26.2	19.66	2.07	0.28	0.19	0.3	1.78	2	0	0	0	6	0	0	4.3	5.51	14.74	1.81	0	1	1	0	0	4	6	10	2	0	10
975	33	29	1	0	23.43	1	0	0	0	0	4.12	6.02	5.59	22	153.86	0.904142	0.7	3.39	0.26	10.93	24.2	17.92	2.63	0.3	0.7	0.48	0.78	2	0	0	0	13.65	0	0	4.85	4.83	15.3	1.7	0	0	1	0	0	8	8	9	1	1	9
976	32	31	1	0	23.77	0	0	0	0	0	4	5.84	5.47	21	136.09	0.877397	0.66	3.67	0.25	10.9	24.16	17.83	2.6	0.29	0.66	0.47	0.81	0	0	0	0	13.14	0	0	4.68	4.72	15.44	1.74	0	0	0	0	0	9	9	16	1	0	8
977	35	36	1	0	23.35	0	0	0	0	0	4.32	7.31	4.31	18	138.26	0.838345	0.63	1.71	0.36	10.91	24.54	18.03	2.67	0.28	0.55	0.57	0.59	2	0	0	0	10.46	0	0	5.22	4.88	15.58	1.76	0	0	1	0	0	4	6	12	1	0	12
978	32	32	0	0	24.36	0	0	0	1	1	2	3.89	5.78	17	120.9	0.54	0.93	5.28	0.24	10.67	22.7	18.26	3.45	0.26	0.15	0.4	1.17	3	0	0	0	40	0	0	5.17	4.21	16.77	1.29	1	1	1	0	0	13	8	11	1	0	7
979	31	29	1	1	23.54	1	0	0	0	0	5.11	5.52	5.87	19	142.28	0.921612	0.76	3.57	0.29	11.23	25.68	18.25	2.46	0.33	0.76	0.41	0.64	1	0	0	0	9.94	0	0	5.14	4.7	14.76	1.84	0	0	1	0	0	8	10	11	1	0	13
980	32	30	1	0	26.32	1	0	0	0	0	2.52	5.97	5.51	20	143.45	0.90362	0.7	3.25	0.29	11.05	24.92	18.04	2.56	0.31	0.71	0.47	0.69	2	0	0	0	11.52	0	0	4.99	4.78	15.16	1.77	1	0	1	0	0	8	9	12	1	0	11
981	35	33	1	0	21.43	0	0	0	0	0	2.52	5.75	5.44	21	143.33	0.866047	0.76	3.43	0.27	10.94	24.06	18.07	2.59	0.31	0.73	0.49	0.86	2	0	0	0	12.47	0	0	4.93	4.66	15.1	1.7	0	0	0	0	0	8	9	4	1	0	10
982	31	31	1	0	23.84	0	0	0	0	0	4.43	5.27	5.77	20	127.26	0.885206	0.71	4.13	0.24	11.01	24.68	17.96	2.5	0.31	0.73	0.43	0.82	0	0	0	0	11.79	0	0	4.71	4.6	15.15	1.78	0	0	1	0	0	10	10	11	1	0	9
983	37	32	0	0	25.89	0	0	0	0	0	1	16.2	0.7	4	344.9	0.83	1.07	0.99	0.31	10.97	25.7	18.36	2.75	0.27	0.26	0.34	0.27	2	0	0	0	12	0	0	8.78	4.22	15.57	2.19	1	0	1	0	0	1	2	10	1	0	11
984	34	36	0	0	24.92	1	1	0	1	1	4	7.49	6.37	17	103.6	1.55	1.23	2.15	0.97	11.97	24	16.56	3.2	0.24	0.15	0.31	0.35	0	0	0	0	8	0	0	4.98	4.7	16.67	0.62	0	0	1	0	0	4	5	11	1	0	12
985	35	32	1	0	24.79	1	0	0	0	0	4.35	6.21	5.25	21	150.25	0.882397	0.73	2.93	0.29	10.91	24.11	18.02	2.65	0.3	0.71	0.52	0.8	2	0	0	0	12.7	0	0	5	4.8	15.26	1.67	0	0	0	0	0	7	8	10	1	0	10
986	31	29	1	0	22.66	1	0	0	0	0	3.96	5.65	5.69	22	137.67	0.907125	0.67	3.86	0.25	10.91	24.33	17.8	2.59	0.29	0.72	0.47	0.82	0	0	0	0	13.36	0	0	4.65	4.76	15.42	1.71	0	0	1	0	0	9	9	7	1	0	8
987	33	31	1	0	24.85	0	0	0	0	0	3.99	5.86	5.44	22	140.04	0.886218	0.69	3.54	0.26	10.86	23.97	17.84	2.63	0.29	0.71	0.5	0.86	2	0	0	0	13.49	0	0	4.72	4.75	15.44	1.67	0	0	1	0	0	9	8	11	1	0	8
988	44	45	1	1	19.32	0	0	0	0	0	3.16	7.82	3.32	23	140.13	0.721598	0.65	1.28	0.32	10.3	21.11	17.67	2.95	0.24	0.5	0.75	1.07	2	0	0	0	15.54	0	0	4.82	4.8	16.3	1.44	0	0	0	0	0	4	2	13	1	0	5
989	34	32	1	0	25.29	1	0	0	0	0	3.76	5.76	6.81	25	151.22	0.824381	0.82	3.82	0.29	10.98	24.22	17.9	2.67	0.32	1.02	0.38	1.88	1	0	0	0	12.64	0	0	4.74	4.7	15.72	1.59	0	0	1	0	0	9	9	9	2	1	9
990	33	29	0	0	27.13	1	1	0	0	0	1	6.05	3.82	213	269.4	1.78	1.15	2.49	2.04	10.67	25.7	16.66	3.31	0.27	0.42	0.28	0.91	2	0	0	0	16	0	0	5.09	4.77	19.6	0.23	0	0	1	0	0	5	4	11	2	0	10
991	30	32	0	0	24.69	0	1	0	0	1	1	5.58	3.98	21	99.32	1.18	0.5	8.16	0.24	10.47	24.2	17.46	2.76	0.26	0.19	0.3	1.26	2	0	0	0	11	0	0	4.75	4.74	12.02	1.94	0	0	1	0	0	13	16	12	2	0	10
992	31	30	0	1	25.75	1	0	0	0	0	4.17	5.65	5.58	21	132.35	0.904056	0.68	3.72	0.26	10.95	24.6	17.86	2.56	0.29	0.73	0.47	0.8	1	0	0	0	12.31	0	0	4.74	4.73	15.36	1.73	0	0	0	0	0	9	9	10	1	0	9
993	29	29	0	0	30.25	0	0	0	0	0	4.53	5.53	5.71	19	126.58	0.922846	0.67	3.75	0.28	11.1	25.49	17.97	2.48	0.3	0.74	0.44	0.68	0	0	0	0	10.5	0	0	4.86	4.72	15.18	1.81	0	0	1	0	0	9	10	10	1	0	11
994	35	39	0	0	25	1	0	0	0	0	3.25	6.69	5.63	24	124.37	0.744466	0.7	2.87	0.32	10.77	23.74	17.7	2.74	0.27	0.86	0.47	1.85	0	0	0	0	11.6	0	0	4.66	4.68	16.37	1.6	0	0	1	0	0	6	6	11	2	0	8
995	32	28	0	1	22.45	1	0	0	0	0	3.57	6.53	6.65	25	163.98	0.881173	0.74	3.01	0.34	11.03	24.94	17.83	2.73	0.31	1	0.41	1.68	1	0	0	0	12.34	0	0	4.93	4.99	15.93	1.59	0	0	1	0	0	7	8	11	2	0	11
996	35	35	0	0	19.83	1	0	0	0	0	4.42	6.12	4.99	20	132.64	0.856194	0.72	2.93	0.3	10.89	24.15	18.01	2.61	0.3	0.71	0.54	0.83	2	0	0	0	11.54	0	0	4.97	4.7	15.33	1.67	0	0	1	0	0	7	8	5	1	1	10
997	34	30	0	0	18.89	1	0	0	0	0	4.56	5.54	5.74	21	149.19	0.913667	0.78	3.57	0.27	10.98	24.34	18.06	2.59	0.32	0.82	0.49	0.87	1	0	0	0	12.69	0	0	4.95	4.74	15.03	1.65	0	0	1	0	0	9	9	20	1	0	10
998	27	25	0	0	25.89	1	0	0	1	1	4	4.6	2.03	7	175.5	1.01	0.24	1.27	0.1	10.47	23.2	17.76	2.46	0.25	0.16	0.33	0.38	1	0	0	0	4	0	0	4.99	5.36	17.27	1.28	0	1	1	0	0	8	12	11	1	0	12
999	31	28	0	1	22.45	1	1	1	0	0	4	6.83	51.54	13	102	0.87	1.37	4.13	0.21	10.77	24.4	17.26	2.83	0.7	4	1.91	0.34	0	0	0	0	9	0	0	4.9	4.8	16.8	1.6	0	0	1	0	0	6	6	13	2	0	10
1000	34	30	0	0	24.44	1	0	0	0	0	3	4.82	4.93	16	69.84	1.06005	1.15	4.39	0.31	11.27	28.2	17.16	3.51	0.26	0.29	0.31	3.9	1	0	0	0	20	0	0	4.74	4.62	13.78	1.91	0	0	1	0	0	6	5	13	2	0	10
1001	41	41	0	1	26.49	0	0	0	0	0	1	2.02	4.16	12	270.9	1.38	1.51	2.46	0.3	10.17	26	16.76	3.51	0.26	0.18	0.24	0.46	2	0	0	0	9	0	0	4.54	5.2	16.46	1.58	0	0	1	0	0	9	5	12	2	0	9
1002	31	33	0	0	25.52	0	0	0	0	0	5.87	6.07	5.17	14	124.46	0.912463	0.76	2.42	0.39	11.39	26.95	18.51	2.4	0.34	0.77	0.45	0.43	2	0	0	0	5.3	0	0	5.61	4.7	14.63	1.89	0	0	1	0	0	5	9	10	1	0	18
1003	31	26	0	0	25.39	0	1	1	0	0	1.5	5.88	5.79	55	118.1	1.96	0.69	5.55	0.1	10.87	22.4	18.76	1.71	0.27	0.17	0.27	0.65	1	0	0	0	3	0	0	4.79	4.22	15.28	1.57	0	0	1	0	0	11	12	9	2	0	10
1004	30	28	1	0	23.26	1	0	0	0	0	3.05	6.07	6.77	26	146.11	0.874811	0.69	3.76	0.29	10.91	24.57	17.57	2.71	0.29	1	0.4	1.8	0	0	0	0	13.36	0	0	4.53	4.9	16.23	1.57	0	0	1	0	0	9	9	15	2	0	8
1005	34	32	1	1	25.45	0	0	0	0	0	3.61	6.78	4.76	21	142.34	0.890642	0.62	2.46	0.31	10.73	23.79	17.71	2.74	0.27	0.67	0.6	0.8	1	0	0	1	13.55	0	0	4.83	4.96	15.86	1.58	0	0	1	0	0	6	6	8	1	0	9
1006	32	30	0	1	19.92	0	1	0	1	0	3	5.28	6.37	12	197.7	0.82	0.76	1.82	0.17	12.07	31.7	18.86	1.93	0.27	0.27	0.28	3.91	2	0	0	0	6	0	0	4.51	4.4	17.33	1	0	0	1	0	0	6	12	15	2	0	10
1007	44	42	1	0	25.89	0	0	0	0	0	3.4	7.65	5.03	26	164.66	0.729409	0.83	1.36	0.39	10.59	22.28	17.91	2.97	0.3	0.94	0.62	1.99	0	0	0	0	13.65	0	0	5.12	4.89	16.27	1.33	0	0	1	0	0	3	3	8	2	0	9
1008	39	38	0	0	27.73	0	0	0	0	0	5	6.36	2.04	15	95.78	0.29	0.17	2.73	0.13	10.57	21.6	17.06	2.76	0.27	0.15	0.31	0.49	1	0	0	0	17	0	0	5.79	4.42	12.93	2.65	0	0	1	0	0	6	6	19	1	0	11
1009	42	41	1	0	25.29	1	0	0	0	0	3.04	7.3	5.23	27	154.45	0.73323	0.79	1.97	0.35	10.54	22.14	17.72	2.95	0.28	0.93	0.6	2.05	0	0	0	0	14.44	0	0	4.84	4.84	16.45	1.34	0	0	1	0	0	5	4	14	2	0	7
1010	41	38	0	0	26.35	0	1	0	1	0	2	5.86	4.7	19	71.77	0.38	2.24	2.27	0.1	9.57	21	17.86	2.36	0.7	7.53	1.91	0.43	1	0	0	0	8	0	0	5.22	4.64	15.8	2.4	1	1	1	0	0	4	7	8	1	0	11
1011	23	25	0	0	30.85	0	0	0	0	0	2	5.58	11.32	8	187.2	1.27	0.15	1.72	0.1	10.37	30	17.36	2.3	0.25	0.19	0.9	0.3	2	0	0	0	7	0	0	4.53	4.36	13.91	1.82	0	0	1	0	0	12	12	11	1	0	13
1012	43	38	1	0	25.6	1	0	0	0	0	3.32	7.5	5.42	27	177.47	0.778342	0.84	1.56	0.38	10.62	22.42	17.87	2.98	0.3	1	0.61	1.99	0	0	0	0	14.63	0	0	5.11	4.99	16.21	1.29	0	0	1	0	0	4	4	10	2	0	9
1013	29	29	0	1	23.05	1	1	0	0	0	4	6.67	5.38	28	114.9	0.192962	1.22	1.52	0.81	11.17	28.6	17.76	3.14	0.7	7.59	1.91	0.3	0	0	0	0	24	0	0	4.91	5.2	13.63	1.1	0	0	1	0	0	4	5	19	2	0	10
1014	30	27	0	0	20.43	0	0	0	1	0	3	8.19	2.49	26	106.9	0.83	0.58	1.88	0.1	11.17	25.9	18.96	1.73	0.33	0.74	0.28	0.38	2	0	0	0	4	0	0	4.04	5.42	16.89	2.69	0	0	1	0	0	6	5	13	2	0	13
1015	34	32	0	0	19.49	0	1	0	0	0	1	6.71	3.65	14	153.5	0.09	0.55	1.92	0.11	11.47	24.6	17.26	3.18	0.25	0.17	0.37	0.47	1	0	0	0	30	0	0	4.55	5.32	15.94	2.49	0	0	1	0	0	6	4	11	1	0	9
1016	41	41	0	1	26.49	0	0	0	0	0	1	2.02	4.16	12	270.9	1.38	1.51	2.46	0.3	10.17	26	16.76	3.51	0.26	0.18	0.24	0.46	2	0	0	0	9	0	0	4.54	5.2	16.46	1.58	0	0	1	0	0	9	5	12	2	0	9
1017	29	29	0	1	23.05	1	1	0	0	0	4	6.67	5.38	16	114.9	0.166805	1.22	1.52	0.81	11.17	28.6	17.76	3.14	0.7	7.59	0.78	0.3	0	0	0	0	24	0	0	4.91	5.2	13.63	1.1	0	0	1	0	0	4	5	10	2	0	10
[truncated: 3 more columns]
